# Supplementary material for: Hierarchy of human IgG recognition within the Staphylococcus aureus immunome
Source: PubMed Central journal article supplement (PMC6125462; doi:10.1038/s41598-018-31424-3), 2018-09-05
Supplement: 41598_2018_31424_MOESM1_ESM.pdf [file 41598_2018_31424_MOESM1_ESM.pdf]

**Supplementary Information:**

**Hierarchy of human IgG recognition within the *Staphylococcus aureus* immunome**

Emily E. Radke,<sup>1</sup> Stuart M. Brown,<sup>1</sup> Adam J. Pelzek,<sup>1</sup> Yi Fulmer,<sup>1</sup> David N. Hernandez,<sup>1</sup> Victor J.

Torres,<sup>2</sup> Isaac P. Thomsen,<sup>3</sup> William K. Chiang,<sup>1</sup> Andy O. Miller,<sup>4</sup> Bo Shopsis,<sup>1</sup> Gregg J.

Silverman<sup>1\*</sup>

1 New York University School of Medicine, Department of Medicine, New York, 10016, USA.

2 New York University School of Medicine, Department of Microbiology, New York, 10016, USA.

3 Vanderbilt University Medical Center, Department of Pediatrics, Division of Infectious Diseases, Nashville, 27232, USA.

4 Hospital for Special Surgery, New York, 10021, USA.

\* Address correspondence to [Gregg.Silverman@nyumc.org](mailto:Gregg.Silverman@nyumc.org)

**Supplementary Figures:**

**Supplementary Figure S1. IgG fold-change between acute and convalescent visits in *S. aureus* by bead-based multiplex assay.** A custom bead-based multiplex assay was used to analyze serially-diluted patient serum samples (acute, short-term follow-up, long-term follow-up), and fold-changes in IgG titer were determined by custom software analysis.

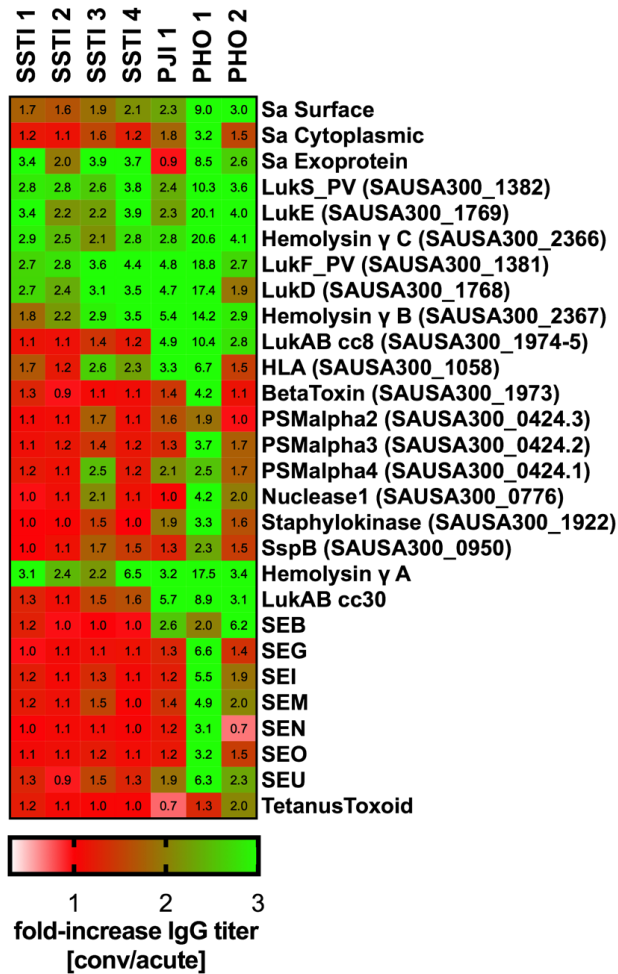

**Supplementary Figure S2. Global serologic antibody responses of *S. aureus* infected patients against MRSA ORFs.** Recombinant proteins from all ORFs (2652) from *S. aureus* strain USA300-FPR3757 were probed for binding of serum IgG from seven infected patients obtained at three different time points. Values were normalized for fluorescence intensity of control spots on each chip. Values above 1.0 were considered positively reactive as they are at least two-fold above background intensity for IgG-reactivity.

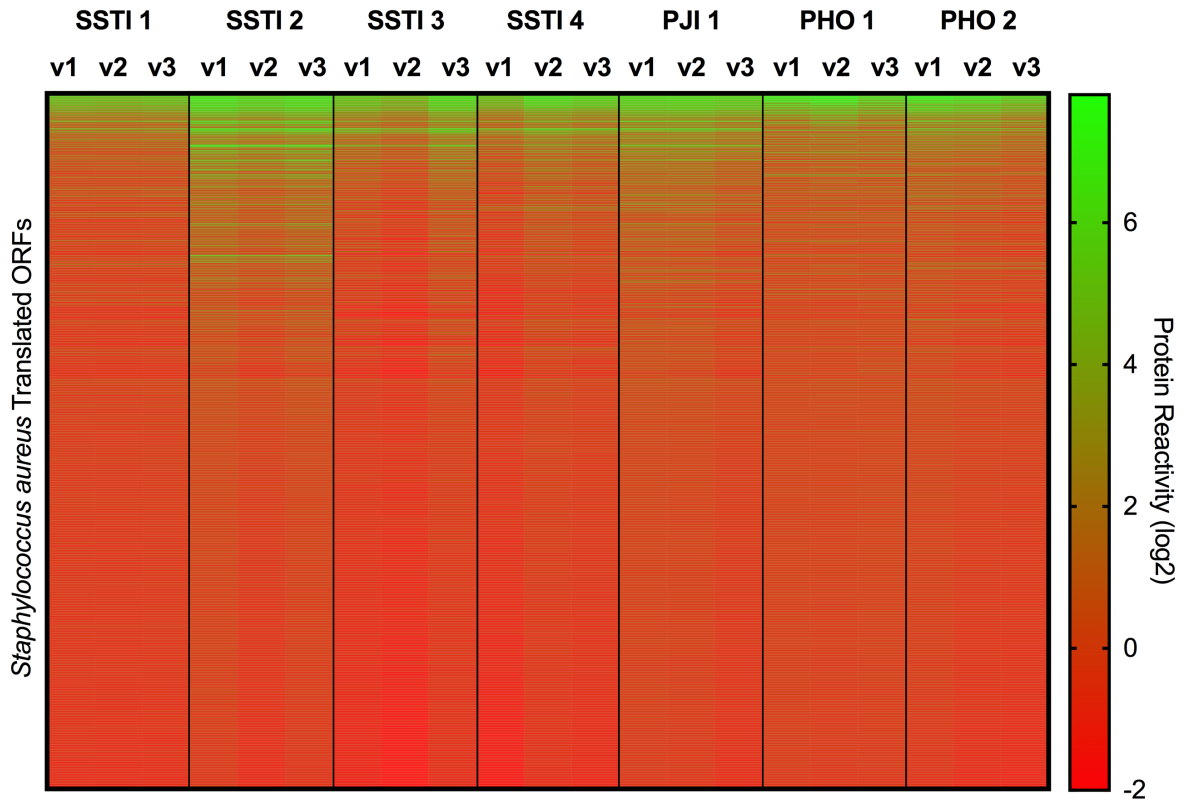

**Supplementary Figure S3. Phylogenetic relationship between *S. aureus* infecting isolates and reference genome.** The relationship between the seven patients infecting *S. aureus* isolates and the reference genome used in the protein array (USA300 FPR-3757). The assembled draft genome contigs were used as genome data for each isolate and the GenBank draft genome assembly for strain USA300 FPR-3757 (GCA\_000013465) was used as a reference.

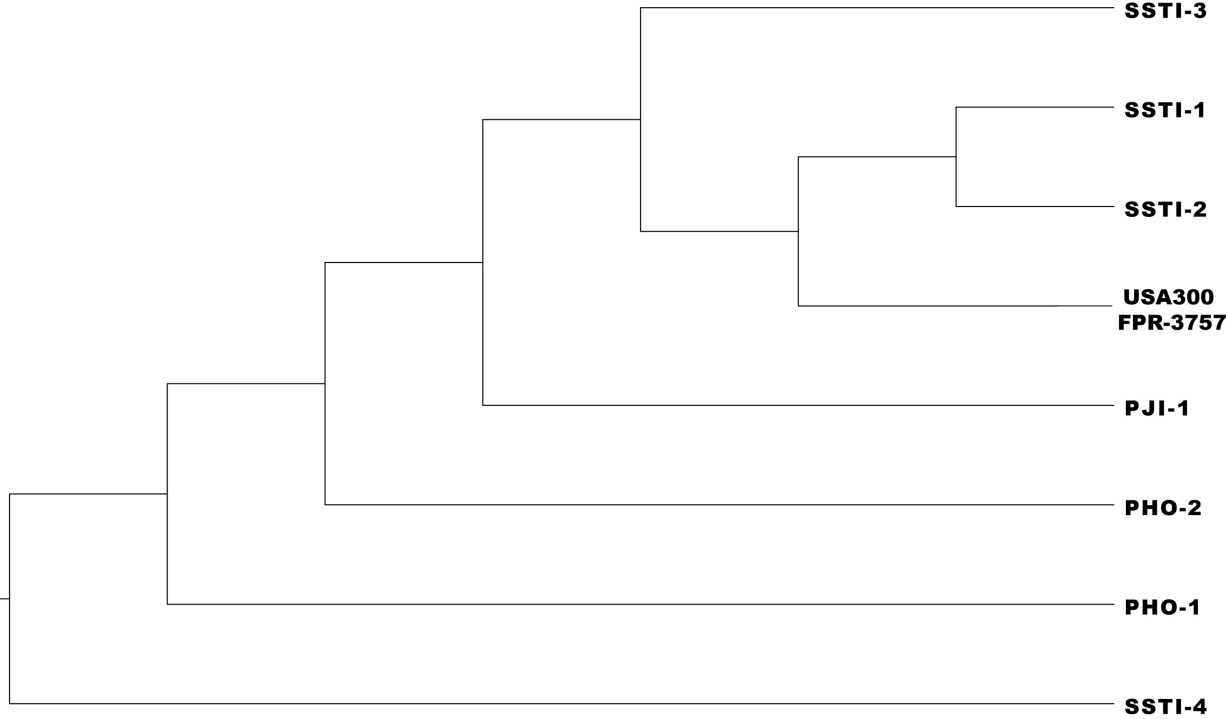





**Supplementary Figure S6. IgG reactivity for *S. aureus* antigens by protein array correlates with the level of increased gene expression at the site of disease.** We performed a Spearman correlation in GraphPad PRISM between IgG reactivity determined by protein array for each antigen with and fold-change in RNA expression for each ORF from abscess infection, as reported by Date et al. <sup>32</sup>. The vertical dotted line is the cut-off for antigens of two-fold above background for IgG reactivity. Similarly, the horizontal dotted line represents the cutoff for gene expression of two-fold above background expression after in vitro culture. The number of antigens in each group are shown by the boxed number in each quadrant. The top 10 reactive proteins from the protein array are highlighted in red and labeled.

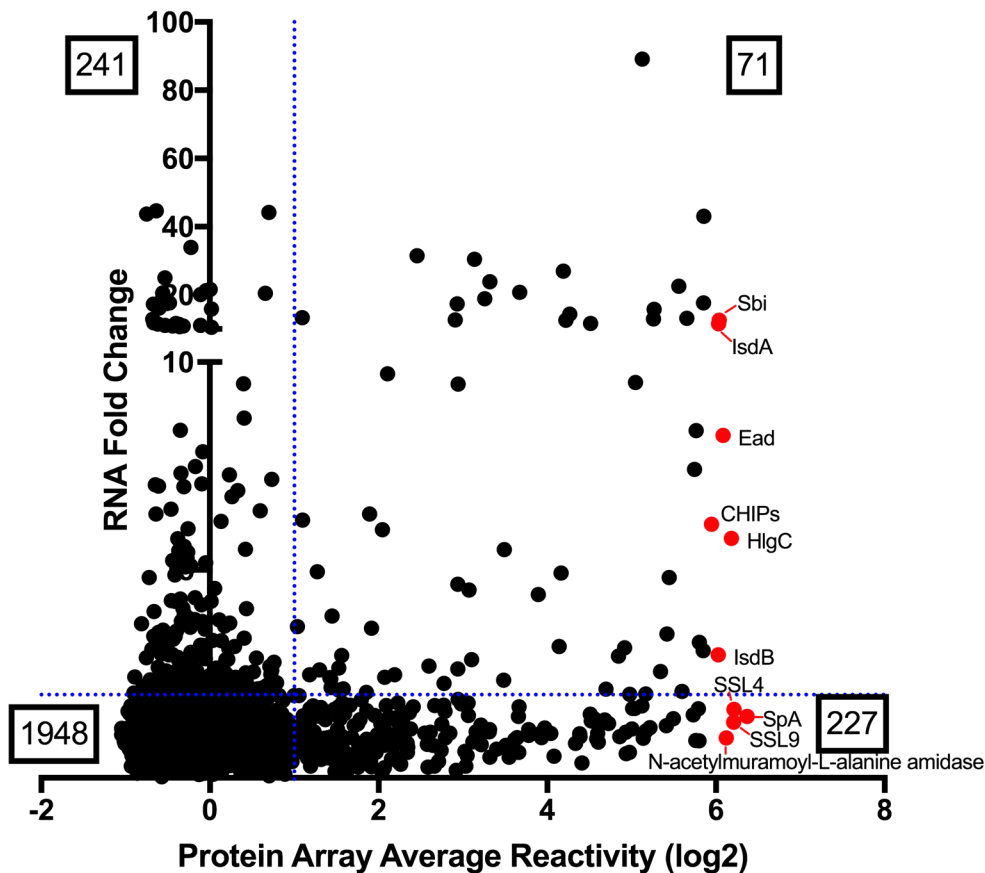

## Supplementary Tables:

**Supplementary Table S1. Antigens included in the multiplex bead-based assay.** Ligands are assigned to categories; *S. aureus* antigens, or positive or negative controls. The full name and abbreviation of each antigen is indicated, as well as the source each antigen. The rank of IgG-reactivity for tested antigen in the chip-based protein array is also shown. N/A: Protein is not present in the array.



|                                    | Antigen                                            | Abbreviation                                   | Rank in Protein Array         | Protein Array ID               |     |
|------------------------------------|----------------------------------------------------|------------------------------------------------|-------------------------------|--------------------------------|-----|
| <b>Positive Controls</b>           | Tetanus Toxoid                                     | Tetanus Tox                                    | N/A                           | N/A                            |     |
|                                    | Phosphorylcholine-16-BSA                           | PC16-BSA                                       | N/A                           | N/A                            |     |
|                                    | Phosphorylcholine-12-BSA                           | PC12-BSA                                       | N/A                           | N/A                            |     |
|                                    | Phosphorylcholine-4-BSA                            | PC4-BSA                                        | N/A                           | N/A                            |     |
| <b>Ig-Binding</b>                  | anti-human IgG Fc-gamma Specific                   | anti-hlgG                                      | N/A                           | N/A                            |     |
|                                    | SpA domain D- WT (5x)                              | SpAD-WT5x                                      | 1                             | SAUSA300_0113                  |     |
|                                    | SpA domain D- FcNull (5x)                          | SpAD-FcNull5x                                  | N/A                           | N/A                            |     |
| <b>Negative Controls</b>           | Bovine Serum Albumin                               | BSA                                            | N/A                           | N/A                            |     |
|                                    | Human Serum Albumin                                | HSA                                            | N/A                           | N/A                            |     |
|                                    | Azobenzene arsonate                                | ABA                                            | N/A                           | N/A                            |     |
| <b>S. aureus protein fractions</b> | surface extract                                    | surface extract                                | N/A                           | N/A                            |     |
|                                    | cytoplasmic extract                                | cytoplasmic extract                            | N/A                           | N/A                            |     |
|                                    | exoproteins                                        | exoproteins                                    | N/A                           | N/A                            |     |
| <b>S. aureus Exotoxins</b>         | Leukocidin S                                       | LukS-PV                                        | 11                            | SAUSA300_1382                  |     |
|                                    | Leukocidin F                                       | LukF-PV                                        | 38                            | SAUSA300_1381                  |     |
|                                    | Leukocidin E                                       | LukE                                           | 284                           | SAUSA300_1769                  |     |
|                                    | Leukocidin D                                       | LukD                                           | 13                            | SAUSA300_1768                  |     |
|                                    | Leukocidin AB cc8                                  | LukABcc8                                       | LukAcc8 - 65<br>LukBcc8 - 163 | SAUSA300_1975<br>SAUSA300_1974 |     |
|                                    | Leukocidin AB cc30                                 | LukABcc30                                      | N/A                           | N/A                            |     |
|                                    | Hemolysin-gamma A                                  | HlgA                                           | N/A                           | N/A                            |     |
|                                    | Hemolysin-gamma B                                  | HlgB                                           | 12                            | SAUSA300_2367                  |     |
|                                    | Hemolysin-gamma C                                  | HlgC                                           | 4                             | SAUSA300_2366                  |     |
|                                    | Alpha Hemolysin                                    | HLA                                            | 23                            | SAUSA300_1058                  |     |
|                                    | β-Toxin                                            | β-Toxin                                        | 176                           | SAUSA300_1973                  |     |
|                                    | <b>Superantigens or Superantigen-like proteins</b> | Staphylococcal Entertoxin B                    | SEB ( <i>S. aureus</i> )      | N/A                            | N/A |
|                                    |                                                    | Staphylococcal Entertoxin B ( <i>E. coli</i> ) | SEB ( <i>E. coli</i> )        | N/A                            | N/A |
| Staphylococcal Entertoxin G        |                                                    | SEG                                            | N/A                           | N/A                            |     |
| Staphylococcal Entertoxin I        |                                                    | SEI                                            | N/A                           | N/A                            |     |
| Staphylococcal Entertoxin M        |                                                    | SEM                                            | N/A                           | N/A                            |     |
| Staphylococcal Entertoxin N        |                                                    | SEN                                            | N/A                           | N/A                            |     |
| Staphylococcal Entertoxin O        |                                                    | SEO                                            | N/A                           | N/A                            |     |
| Staphylococcal Entertoxin U        |                                                    | SEU                                            | N/A                           | N/A                            |     |
| <b>Phenol Soluble Modulins</b>     | Phenol Soluble Modulin 1                           | PSM1                                           | 740                           | SAUSA300_0424.4                |     |
|                                    | Phenol Soluble Modulin 2                           | PSM2                                           | 874                           | SAUSA300_0424.3                |     |
|                                    | Phenol Soluble Modulin 3                           | PSM3                                           | 256                           | SAUSA300_0424.2                |     |
|                                    | Phenol Soluble Modulin 4                           | PSM4                                           | 679                           | SAUSA300_0424.1                |     |
| <b>Other S. aureus proteins</b>    | Nuclease 1                                         | Nuc1                                           | 25                            | SAUSA300_0776                  |     |
|                                    | Staphylokinase                                     | Sak                                            | 31                            | SAUSA300_1922                  |     |
|                                    | Cysteine Protease SspB                             | SspB                                           | 37                            | SAUSA300_0950                  |     |
| <b>Other microbial antigens</b>    | SP superantigen                                    | SP superantigen                                | N/A                           | N/A                            |     |
|                                    | Pneumococcal polysaccharide 12                     | Pneumo ps12                                    | N/A                           | N/A                            |     |
|                                    | Pneumococcal polysaccharide 23                     | Pneumo ps23                                    | N/A                           | N/A                            |     |
|                                    | Poly N-acetyl Glucosamine                          | PNAG                                           | N/A                           | N/A                            |     |
|                                    | Pneumococcal Cell Wall Polysaccharide              | Pneumo CWPS                                    | N/A                           | N/A                            |     |
|                                    | <i>S. pneumoniae</i> pneumolysin                   | PLY                                            | N/A                           | N/A                            |     |
|                                    | <i>S. pyogenes</i> ArcA                            | ArcA                                           | N/A                           | N/A                            |     |

**Supplementary Table S2. Antigens without significant IgG reactivity by protein array.** Antigens that fell below the cutoff of two-fold above background are listed with their ranking number, locus tag and protein name/description.

| <b>Locus Tag</b> | <b>Protein Name/Description</b>                  | <b>Rank</b> |
|------------------|--------------------------------------------------|-------------|
| SAUSA300_1965    | conserved hypothetical phage protein             | 1087        |
|                  | tRNA (guanine-N(7)-)-methyltransferase (trmB)    |             |
| SAUSA300_1694    | [2.1.1.33]                                       | 1088        |
| SAUSA300_1333-s1 | conserved hypothetical protein                   | 1089        |
| SAUSA300_0781    | conserved hypothetical protein                   | 1090        |
| SAUSA300_1979    | cation transport family protein                  | 1091        |
| SAUSA300_0017    | adenylosuccinate synthetase (purA) [6.3.4.4]     | 1092        |
| SAUSA300_0631    | putative nucleoside transporter                  | 1093        |
| SAUSA300_0508    | conserved hypothetical protein                   | 1094        |
| SAUSA300_1750-s1 | conserved hypothetical protein                   | 1095        |
| SAUSA300_1802    | conserved hypothetical protein                   | 1096        |
| SAUSA300_0260    | 6-phospho-beta-glucosidase (bgIA) [3.2.1.86]     | 1097        |
| SAUSA300_0608    | conserved hypothetical protein                   | 1098        |
| SAUSA300_2063    | ATP synthase F0, C subunit (atpE) [3.6.3.14]     | 1099        |
| SAUSA300_1848    | conserved hypothetical protein                   | 1100        |
| SAUSA300_0805    | pathogenicity island protein                     | 1101        |
| SAUSA300_1899    | conserved hypothetical protein                   | 1102        |
| SAUSA300_1295    | cold shock protein, CSD family                   | 1103        |
| SAUSA300_1609    | type III leader peptidase family protein         | 1104        |
| SAUSA300_1710    | putative lysophospholipase                       | 1105        |
| SAUSA300_1041    | conserved hypothetical protein                   | 1106        |
| SAUSA300_2134    | iron compound ABC transporter, permease protein  | 1107        |
| SAUSA300_1163    | ribosome-binding factor A (rbfA)                 | 1108        |
| SAUSA300_2142    | alkaline shock protein 23 (asp23)                | 1109        |
|                  | thiamine-phosphate pyrophosphorylase (thiE)      |             |
| SAUSA300_2047    | [2.5.1.3]                                        | 1110        |
| SAUSA300_0347    | Sec-independent protein translocase TatC (tatC)  | 1111        |
| SAUSA300_2095    | conserved hypothetical protein                   | 1112        |
| SAUSA300_2156    | lactose phosphotransferase system repressor      | 1113        |
| SAUSA300_0932    | putative membrane protein                        | 1114        |
| SAUSA300_0812    | conserved hypothetical protein                   | 1115        |
|                  | phiSLT ORF92-like protein, uncharacterized phage |             |
| SAUSA300_1400    | protein (possible DNA packaging)                 | 1116        |
| SAUSA300_1662    | aminotransferase, class V                        | 1117        |
|                  | Mannitol-1-phosphate 5-dehydrogenase (mtID)      |             |
| SAUSA300_2108    | [1.1.1.17]                                       | 1118        |
| pUSA01_0005      | putative membrane protein                        | 1119        |
| SAUSA300_0811    | conserved hypothetical protein                   | 1120        |
|                  | phiSLT ORF 101-like protein, terminase, small    |             |
| SAUSA300_1405    | subunit                                          | 1121        |
| SAUSA300_0621    | iron-dependent repressor                         | 1122        |
| SAUSA300_0361    | ParB-like partition protein                      | 1123        |
| SAUSA300_0496    | lysyl-tRNA synthetase (lysS) [6.1.1.6]           | 1124        |
| SAUSA300_0850    | Na(+)/H(+) antiporter subunit F (mnhF) [2.3.1.-] | 1125        |
|                  | 1-acyl-sn-glycerol-3-phosphate acyltransferases  |             |
| SAUSA300_1673    | [2.3.1.51]                                       | 1126        |
| SAUSA300_1275    | peptide ABC transporter, permease protein        | 1127        |
| SAUSA300_2591    | conserved hypothetical protein                   | 1128        |
| SAUSA300_0762    | preprotein translocase, SecG subunit (secG)      | 1129        |
| SAUSA300_0657    | conserved hypothetical protein                   | 1130        |
| SAUSA300_1144    | glucose inhibited division protein (gid)         | 1131        |
| SAUSA300_1203    | conserved hypothetical protein                   | 1132        |
| SAUSA300_0808    | conserved hypothetical protein                   | 1133        |
| SAUSA300_0421    | conserved hypothetical protein                   | 1134        |
| SAUSA300_0632    | conserved hypothetical protein                   | 1135        |
| SAUSA300_1541    | co-chaperone GrpE (grpE)                         | 1136        |
| SAUSA300_1362    | DNA-binding protein HU (hup)                     | 1137        |
| SAUSA300_2349    | formate/nitrite transporter family protein       | 1138        |
| SAUSA300_1248    | conserved hypothetical protein                   | 1139        |

|                  |                                                                                                                  |      |
|------------------|------------------------------------------------------------------------------------------------------------------|------|
| SAUSA300_1210    | conserved hypothetical protein                                                                                   | 1140 |
| SAUSA300_0345    | Tat-translocated enzyme                                                                                          | 1141 |
| SAUSA300_0068    | cadmium-exporting ATPase, truncation                                                                             | 1142 |
| SAUSA300_0241    | PTS system, sorbitol-specific IIC component (gatC)                                                               | 1143 |
| pUSA03_0004      | conserved hypothetical protein                                                                                   | 1144 |
| SAUSA300_2256    | putative N-acetylmuramoyl-L-alanine amidase                                                                      | 1145 |
| SAUSA300_1687-s1 | FtsK/SpoIIIE family protein                                                                                      | 1146 |
| SAUSA300_1196    | RNA chaperone, host factor-1 protein (hfq)                                                                       | 1147 |
| SAUSA300_0529    | conserved hypothetical protein                                                                                   | 1148 |
| SAUSA300_0835    | D-alanine-activating enzyme/D-alanine-D-alanyl,<br>dltA protein (dltA)                                           | 1149 |
| SAUSA300_1167    | polyribopolyribonucleotide nucleotidyltransferase<br>(pnpA) [2.7.7.8]                                            | 1150 |
| SAUSA300_0519    | conserved hypothetical protein                                                                                   | 1151 |
| SAUSA300_0300    | conserved hypothetical protein                                                                                   | 1152 |
| SAUSA300_1583    | conserved hypothetical protein                                                                                   | 1153 |
| SAUSA300_1445    | segregation and condensation protein A (scpA)                                                                    | 1154 |
| SAUSA300_1638    | sensory box histidine kinase PhoR (phoR) [2.7.3.-]<br>phi77 ORF014-like protein, phage anti-repressor<br>protein | 1155 |
| SAUSA300_1966    | acetolactate synthase, small subunit (ilvN) [4.1.3.18]                                                           | 1156 |
| SAUSA300_2008    | phiSLT ORF78-like protein                                                                                        | 1157 |
| SAUSA300_1432    | transfer complex protein Tral (DNA topoisomerase<br>III) (tral) [5.99.1.2]                                       | 1158 |
| pUSA03_0018      | phiSLT ORF 81b-like protein                                                                                      | 1159 |
| SAUSA300_1416    | phi77 ORF071-like protein                                                                                        | 1160 |
| SAUSA300_1945    | conserved hypothetical protein                                                                                   | 1161 |
| SAUSA300_2348    | conserved hypothetical protein                                                                                   | 1162 |
| SAUSA300_2519    | putative cobalamin synthesis protein                                                                             | 1163 |
| SAUSA300_2642    | conserved hypothetical protein                                                                                   | 1164 |
| SAUSA300_0533    | translation elongation factor Tu (tuf)                                                                           | 1165 |
| SAUSA300_0849    | Na(+)/H(+) antiporter subunit G (mnhG)                                                                           | 1166 |
| SAUSA300_0080    | conserved hypothetical protein                                                                                   | 1167 |
| SAUSA300_1997    | conserved hypothetical protein                                                                                   | 1168 |
| SAUSA300_2191    | 30S ribosomal protein S14 (rpsN)                                                                                 | 1169 |
| SAUSA300_1527    | GTP-binding protein Era (era)                                                                                    | 1170 |
| SAUSA300_2132    | conserved hypothetical protein                                                                                   | 1171 |
| SAUSA300_0013    | putative membrane protein                                                                                        | 1172 |
| SAUSA300_0325    | glycine cleavage H-protein                                                                                       | 1173 |
| SAUSA300_0839    | conserved hypothetical protein                                                                                   | 1174 |
| SAUSA300_2308    | response regulator protein                                                                                       | 1175 |
| pUSA03_0026      | conserved hypothetical protein                                                                                   | 1176 |
| pUSA03_0017      | transfer complex protein TraH (traH)                                                                             | 1177 |
| SAUSA300_0612    | putative Na <sup>+</sup> /H <sup>+</sup> antiporter, MnhC component                                              | 1178 |
| SAUSA300_0882    | conserved hypothetical protein                                                                                   | 1179 |
| SAUSA300_1259    | ImpB/MucB/SamB family protein                                                                                    | 1180 |
| SAUSA300_0554    | glucosamine-6-phosphate isomerase [3.5.99.6]                                                                     | 1181 |
| SAUSA300_0792    | conserved hypothetical protein                                                                                   | 1182 |
| SAUSA300_0675    | conserved hypothetical protein                                                                                   | 1183 |
| SAUSA300_2205    | 30S ribosomal protein S10 (rpsJ)                                                                                 | 1184 |
| SAUSA300_1325    | conserved hypothetical protein                                                                                   | 1185 |
| SAUSA300_1394    | conserved hypothetical phage protein                                                                             | 1186 |
| SAUSA300_0077    | ABC transporter, ATP-binding protein                                                                             | 1187 |
| SAUSA300_2102    | haloacid dehalogenase-like hydrolase                                                                             | 1188 |
| SAUSA300_0806    | conserved hypothetical protein                                                                                   | 1189 |
| SAUSA300_0699    | chorismate binding enzyme domain protein                                                                         | 1190 |
| SAUSA300_2046    | membrane protein oxaA precursor (oxaA)                                                                           | 1191 |
| SAUSA300_0592    | conserved hypothetical protein                                                                                   | 1192 |
| SAUSA300_1915    | conserved hypothetical protein                                                                                   | 1193 |
| SAUSA300_1202    | conserved hypothetical protein                                                                                   | 1194 |
| SAUSA300_0777    | cold shock protein                                                                                               | 1195 |
| SAUSA300_1663    | conserved hypothetical protein                                                                                   | 1196 |

|                  |                                                                                |      |
|------------------|--------------------------------------------------------------------------------|------|
| SAUSA300_2217    | putative drug transporter                                                      | 1197 |
| SAUSA300_0915    | conserved hypothetical protein                                                 | 1198 |
| SAUSA300_2580    | isochorismatase family protein                                                 | 1199 |
| SAUSA300_1448    | transcriptional regulator, Fur family                                          | 1200 |
| SAUSA300_0624    | teichoic acid translocation ATP-binding protein (tagH) [3.6.3.40]              | 1201 |
| SAUSA300_0316    | ROK family protein                                                             | 1202 |
| SAUSA300_0098    | conserved hypothetical protein                                                 | 1203 |
| SAUSA300_1360    | menaquinone biosynthesis methyltransferase ubiE (ubiE) [2.1.1.-]               | 1204 |
| SAUSA300_1004    | conserved hypothetical protein                                                 | 1205 |
| SAUSA300_1534    | conserved hypothetical protein                                                 | 1206 |
| SAUSA300_2267    | hydrolase, haloacid dehalogenase-like family                                   | 1207 |
| SAUSA300_0715    | nrdI protein (nrdI)                                                            | 1208 |
| SAUSA300_1930-s2 | phi77 ORF001-like protein, phage tail tape measure protein                     | 1209 |
| SAUSA300_1749    | conserved hypothetical protein                                                 | 1210 |
| SAUSA300_0104    | transcriptional regulator, AraC family                                         | 1211 |
| SAUSA300_1157-s2 | DNA polymerase III, alpha subunit (poIC) [2.7.7.7]                             | 1212 |
| SAUSA300_2466    | putative membrane protein                                                      | 1213 |
| SAUSA300_0967    | phosphoribosylaminoimidazole carboxylase, ATPase subunit (purK) [4.1.1.21]     | 1214 |
| SAUSA300_1107    | conserved hypothetical protein                                                 | 1215 |
| SAUSA300_2050    | TENA/THI-4 family protein                                                      | 1216 |
| SAUSA300_0655    | conserved hypothetical protein                                                 | 1217 |
| SAUSA300_1623    | conserved hypothetical protein                                                 | 1218 |
| SAUSA300_0183    | conserved hypothetical protein                                                 | 1219 |
| SAUSA300_2390    | glycine betaine/carnitine/choline transport system permease (opuCd) [3.6.3.32] | 1220 |
| SAUSA300_0053    | Spermidine N(1)-acetyltransferase (speG) [2.3.1.57]                            | 1221 |
| SAUSA300_2157    | NAD-dependent deacetylase                                                      | 1222 |
| SAUSA300_0942    | conserved hypothetical protein                                                 | 1223 |
| SAUSA300_0515    | cysteinyI-tRNA synthetase (cysS) [6.1.1.16]                                    | 1224 |
| pUSA01_0002      | hypothetical protein                                                           | 1225 |
| SAUSA300_0816    | CsbD-like superfamily                                                          | 1226 |
| SAUSA300_0581    | conserved hypothetical protein                                                 | 1227 |
| SAUSA300_1461    | conserved hypothetical protein                                                 | 1228 |
| SAUSA300_0896    | oligopeptide ABC transporter, permease protein (oppC)                          | 1229 |
| SAUSA300_2098    | transcriptional repressor, ArsR family (arsR)                                  | 1230 |
| SAUSA300_0048    | hypothetical protein                                                           | 1231 |
| SAUSA300_1343    | endonuclease III (nth) [4.2.99.18]                                             | 1232 |
| SAUSA300_1508    | conserved hypothetical protein                                                 | 1233 |
| SAUSA300_2034    | K <sup>+</sup> -transporting ATPase, A subunit (kdpA) [3.6.3.12]               | 1234 |
| SAUSA300_1492    | putative lipoprotein                                                           | 1235 |
| SAUSA300_0050    | conserved hypothetical protein                                                 | 1236 |
| SAUSA300_1255    | oxacillin resistance-related FmtC protein (fmtC)                               | 1237 |
| SAUSA300_2250    | Na <sup>+</sup> /H <sup>+</sup> antiporter NhaC (nhaC)                         | 1238 |
| SAUSA300_0960    | quinol oxidase, subunit IV (qoxD) [1.9.3.-]                                    | 1239 |
| SAUSA300_0015    | 50S ribosomal protein L9 (rplI)                                                | 1240 |
| SAUSA300_2512    | glyoxalase family protein                                                      | 1241 |
| SAUSA300_0120    | siderophore biosynthesis protein, lucC family (sbnC)                           | 1242 |
| SAUSA300_0460    | conserved hypothetical protein                                                 | 1243 |
| SAUSA300_2434    | transporter protein                                                            | 1244 |
| SAUSA300_1209    | conserved hypothetical protein                                                 | 1245 |
| SAUSA300_1489    | conserved hypothetical protein                                                 | 1246 |
| SAUSA300_1205    | conserved hypothetical protein                                                 | 1247 |
| SAUSA300_0906    | conserved hypothetical protein                                                 | 1248 |
| SAUSA300_2527    | conserved hypothetical protein                                                 | 1249 |
| SAUSA300_2074    | 50S ribosomal protein L31 type B (rpmE)                                        | 1250 |
| SAUSA300_2499    | squalene desaturase (crtM) [2.5.1.-]                                           | 1251 |

|                  |                                                                      |      |
|------------------|----------------------------------------------------------------------|------|
| SAUSA300_1502    | putative competence protein ComGC                                    | 1252 |
| SAUSA300_0662    | acetyltransferase, GNAT family                                       | 1253 |
| SAUSA300_2625    | transcriptional regulator, PadR family                               | 1254 |
| SAUSA300_1937    | phi77 ORF045-like protein                                            | 1255 |
| SAUSA300_2353    | conserved hypothetical protein                                       | 1256 |
| SAUSA300_2127    | conserved hypothetical protein                                       | 1257 |
| SAUSA300_1742    | conserved hypothetical protein                                       | 1258 |
| SAUSA300_2067    | serine hydroxymethyltransferase (glyA) [2.1.2.1]                     | 1259 |
| SAUSA300_1314    | conserved hypothetical protein                                       | 1260 |
| SAUSA300_0937    | conserved hypothetical protein                                       | 1261 |
| SAUSA300_1750-s2 | conserved hypothetical protein                                       | 1262 |
| SAUSA300_2062    | ATP synthase F0, B subunit (atpF) [3.6.3.14]                         | 1263 |
| SAUSA300_1131    | 30S ribosomal protein S16 (rpsP)                                     | 1264 |
| SAUSA300_2555    | glutathione peroxidase [1.11.1.9]                                    | 1265 |
| SAUSA300_2433    | phosphoglucosyltransferase/phosphomannosyltransferase family protein | 1266 |
| SAUSA300_1086    | putative cell-division initiation protein                            | 1267 |
| SAUSA300_0595    | conserved hypothetical protein                                       | 1268 |
| SAUSA300_2056    | conserved hypothetical protein                                       | 1269 |
| SAUSA300_0826    | conserved hypothetical protein                                       | 1270 |
| SAUSA300_1983    | 10 kDa chaperonin (groES)                                            | 1271 |
| SAUSA300_1969    | phi77 ORF011-like protein, phage transcriptional repressor           | 1272 |
| SAUSA300_2080    | conserved hypothetical protein                                       | 1273 |
| SAUSA300_0471    | veg protein                                                          | 1274 |
| SAUSA300_1918    | truncated beta-hemolysin                                             | 1275 |
| SAUSA300_1079    | cell division protein ftsA (ftsA)                                    | 1276 |
| SAUSA300_0664    | conserved hypothetical protein                                       | 1277 |
| SAUSA300_1598    | holliday junction DNA helicase RuvA (ruvA)                           | 1278 |
| SAUSA300_1096-s1 | carbamoyl-phosphate synthase, large subunit (carB) [6.3.5.5]         | 1279 |
| SAUSA300_1603    | 50S ribosomal protein L21 (rplU)                                     | 1280 |
| SAUSA300_0163    | capsular polysaccharide biosynthesis protein Cap5L (cap5L) [2.4.1.-] | 1281 |
| SAUSA300_1125    | acyl carrier protein (acpP)                                          | 1282 |
| SAUSA300_1221    | conserved hypothetical protein                                       | 1283 |
| SAUSA300_1230    | conserved hypothetical protein                                       | 1284 |
| SAUSA300_2283    | ribose 5-phosphate isomerase A (rpiA) [5.3.1.6]                      | 1285 |
| SAUSA300_0901    | putative competence protein                                          | 1286 |
| SAUSA300_2396    | para-nitrobenzyl esterase (pnbA) [3.1.1.-]                           | 1287 |
| SAUSA300_2280    | metallothiol transferase fosB (fosB) [2.5.1.18]                      | 1288 |
| SAUSA300_0949    | cysteine protease (sspC)                                             | 1289 |
| SAUSA300_1319    | dihydrofolate reductase (folA) [1.5.1.3]                             | 1290 |
| SAUSA300_0920    | conserved hypothetical protein                                       | 1291 |
| SAUSA300_0538    | NAD dependent epimerase/dehydratase family [5.1.3.2]                 | 1292 |
| SAUSA300_1927    | phi77 ORF109-like protein                                            | 1293 |
| SAUSA300_0423    | conserved hypothetical protein                                       | 1294 |
| SAUSA300_1692    | conserved hypothetical protein                                       | 1295 |
| SAUSA300_2384    | putative Na <sup>+</sup> /H <sup>+</sup> antiporter                  | 1296 |
| SAUSA300_0782    | conserved hypothetical protein                                       | 1297 |
| SAUSA300_0254    | sensor histidine kinase                                              | 1298 |
| SAUSA300_0211    | maltose ABC transporter, permease protein                            | 1299 |
| SAUSA300_0181-s1 | non-ribosomal peptide synthetase                                     | 1300 |
| SAUSA300_1021    | hypothetical protein                                                 | 1301 |
| SAUSA300_2493    | conserved hypothetical protein                                       | 1302 |
| SAUSA300_2193    | 50S ribosomal protein L24 (rplX)                                     | 1303 |
| SAUSA300_0779    | conserved hypothetical protein                                       | 1304 |
| SAUSA300_1935    | phi77 ORF029-like protein                                            | 1305 |
| SAUSA300_2215    | conserved hypothetical protein                                       | 1306 |
| SAUSA300_0055    | alcohol dehydrogenase, zinc-containing                               | 1307 |

|               |                                                    |      |
|---------------|----------------------------------------------------|------|
| SAUSA300_0439 | conserved hypothetical protein                     | 1308 |
| SAUSA300_1253 | transcription antiterminator (glcT)                | 1309 |
| SAUSA300_1160 | conserved hypothetical protein                     | 1310 |
| SAUSA300_1990 | accessory gene regulator protein D (agrD)          | 1311 |
| SAUSA300_1469 | arginine repressor (argR)                          | 1312 |
| SAUSA300_2360 | multidrug resistance protein                       | 1313 |
| SAUSA300_2286 | conserved hypothetical protein                     | 1314 |
| SAUSA300_2143 | conserved hypothetical protein                     | 1315 |
| SAUSA300_2294 | conserved hypothetical protein                     | 1316 |
| SAUSA300_1040 | conserved hypothetical protein                     | 1317 |
| SAUSA300_0719 | iron compound ABC transporter, permease protein    | 1318 |
| SAUSA300_1388 | phiSLT ORF488-like protein                         | 1319 |
| SAUSA300_1607 | conserved hypothetical protein                     | 1320 |
| SAUSA300_0106 | putative drug transporter                          | 1321 |
| SAUSA300_0785 | acetyltransferase, GNAT family [2.3.1.-]           | 1322 |
| SAUSA300_2361 | conserved hypothetical protein                     | 1323 |
| SAUSA300_0305 | formate/nitrite transporter family protein         | 1324 |
| SAUSA300_2638 | conserved hypothetical protein                     | 1325 |
| SAUSA300_2408 | oligopeptide ABC transporter, ATP-binding protein  | 1326 |
| SAUSA300_2524 | conserved hypothetical protein                     | 1327 |
|               | molybdopterin-guanine dinucleotide biosynthesis    |      |
| SAUSA300_2223 | protein B (mobB)                                   | 1328 |
| SAUSA300_0232 | conserved hypothetical protein                     | 1329 |
| SAUSA300_0197 | conserved hypothetical protein                     | 1330 |
| SAUSA300_0694 | putative membrane protein                          | 1331 |
| SAUSA300_0908 | NAD(+)/NADH kinase [2.7.1.-]                       | 1332 |
| SAUSA300_0029 | conserved hypothetical protein                     | 1333 |
| SAUSA300_0189 | isochorismatase (entB) [3.3.2.1]                   | 1334 |
| SAUSA300_2514 | conserved hypothetical protein                     | 1335 |
| SAUSA300_1180 | conserved hypothetical protein                     | 1336 |
| SAUSA300_2199 | 50S ribosomal protein L22 (rplV)                   | 1337 |
|               | acetyl-CoA carboxylase, carboxyl transferase, beta |      |
| SAUSA300_1647 | subunit (accD) [6.4.1.2]                           | 1338 |
| pUSA03_0011   | transfer complex protein TraB (traB)               | 1339 |
| SAUSA300_1926 | phi77 ORF044-like protein                          | 1340 |
| SAUSA300_2481 | conserved hypothetical protein                     | 1341 |
| SAUSA300_0790 | putative arsenate reductase                        | 1342 |
| SAUSA300_1803 | conserved hypothetical protein                     | 1343 |
| SAUSA300_2202 | 50S ribosomal protein L23 (rplW)                   | 1344 |
| SAUSA300_1932 | conserved hypothetical phage protein               | 1345 |
|               | PTS system, fructose-specific enzyme II, BC        |      |
| SAUSA300_0239 | component [2.7.1.69]                               | 1346 |
| SAUSA300_2355 | putative lipoprotein                               | 1347 |
| SAUSA300_0710 | hypothetical protein                               | 1348 |
| SAUSA300_0512 | PIN domain protein                                 | 1349 |
|               | truncated hypothetical protein, similar to type I  |      |
| SAUSA300_0035 | restriction-modification system endonuclease       | 1350 |
| SAUSA300_0789 | putative thioredoxin                               | 1351 |
|               | phiSLT ORF 87-like protein, putative DNA-binding   |      |
| SAUSA300_1430 | protein                                            | 1352 |
| SAUSA300_0059 | conserved hypothetical protein                     | 1353 |
| SAUSA300_2196 | 50S ribosomal protein L29 (rpmC)                   | 1354 |
| SAUSA300_2335 | conserved hypothetical protein                     | 1355 |
|               | peptide methionine sulfoxide reductase MsrA        |      |
| SAUSA300_1256 | (msrA) [1.8.4.6]                                   | 1356 |
| SAUSA300_1431 | phiSLT ORF71-like protein                          | 1357 |
| SAUSA300_2508 | conserved hypothetical protein                     | 1358 |
| SAUSA300_1240 | conserved hypothetical protein                     | 1359 |
| SAUSA300_2144 | conserved hypothetical protein                     | 1360 |
|               | phosphopantetheine adenylyltransferase (coaD)      |      |
| SAUSA300_1024 | [2.7.7.3]                                          | 1361 |

|               |                                                                                              |      |
|---------------|----------------------------------------------------------------------------------------------|------|
| SAUSA300_1166 | 30S ribosomal protein S15 (rpsO)                                                             | 1362 |
| SAUSA300_1258 | 4-oxalocrotonate tautomerase [5.3.2.-]                                                       | 1363 |
| SAUSA300_1873 | Mur ligase family protein                                                                    | 1364 |
| SAUSA300_0451 | acetyltransferase, GNAT family [2.3.1.-]                                                     | 1365 |
| SAUSA300_0352 | ABC transporter, ATP-binding protein                                                         | 1366 |
| SAUSA300_1395 | phiSLT ORF116b-like protein                                                                  | 1367 |
| SAUSA300_1008 | conserved hypothetical protein                                                               | 1368 |
| SAUSA300_0615 | putative Na <sup>+</sup> /H <sup>+</sup> antiporter, MnhF component                          | 1369 |
| SAUSA300_0658 | transcriptional regulator, LysR family                                                       | 1370 |
| SAUSA300_1874 | ferritins family protein                                                                     | 1371 |
| SAUSA300_0561 | hypothetical protein                                                                         | 1372 |
| SAUSA300_0744 | prolipoprotein diacylglycerol transferase (lgt)<br>[2.4.99.-]                                | 1373 |
| SAUSA300_0374 | putative membrane protein                                                                    | 1374 |
| SAUSA300_1276 | oligopeptide permease, channel-forming protein<br>(opp-2B)                                   | 1375 |
| SAUSA300_2093 | conserved hypothetical protein                                                               | 1376 |
| SAUSA300_0545 | Flavodoxin-like fold [1.5.1.29]                                                              | 1377 |
| SAUSA300_0837 | D-alanine-activating enzyme/D-alanine-D-alanyl,<br>dltC protein (dltC)                       | 1378 |
| SAUSA300_1352 | putative membrane protein                                                                    | 1379 |
| SAUSA300_1518 | ATP-dependent RNA helicase, DEAD/DEAH box<br>family                                          | 1380 |
| SAUSA300_2053 | conserved hypothetical protein                                                               | 1381 |
| SAUSA300_1265 | indole-3-glycerol phosphate synthase (trpC)<br>[4.1.1.48]                                    | 1382 |
| SAUSA300_1297 | conserved hypothetical protein                                                               | 1383 |
| SAUSA300_2425 | conserved hypothetical protein                                                               | 1384 |
| SAUSA300_2158 | conserved hypothetical protein                                                               | 1385 |
| SAUSA300_1342 | conserved hypothetical protein                                                               | 1386 |
| SAUSA300_1298 | putative XpaC protein                                                                        | 1387 |
| SAUSA300_1434 | phiSLT ORF104a-like protein, repressor                                                       | 1388 |
| SAUSA300_0494 | 2-amino-4-hydroxy-6-<br>hydroxymethyl-dihydropteridine pyrophosphokinase<br>(folK) [2.7.6.3] | 1389 |
| SAUSA300_2544 | conserved hypothetical protein                                                               | 1390 |
| SAUSA300_1440 | conserved hypothetical protein                                                               | 1391 |
| SAUSA300_2428 | staphylococcus tandem lipoprotein                                                            | 1392 |
| SAUSA300_0933 | conserved hypothetical protein                                                               | 1393 |
| SAUSA300_2619 | conserved hypothetical protein                                                               | 1394 |
| SAUSA300_0619 | ABC transporter, permease protein                                                            | 1395 |
| SAUSA300_2200 | 30S ribosomal protein S19 (rpsS)                                                             | 1396 |
| SAUSA300_0761 | conserved hypothetical protein                                                               | 1397 |
| SAUSA300_1653 | conserved hypothetical protein                                                               | 1398 |
| SAUSA300_1496 | glycine dehydrogenase, subunit 2 [1.4.4.2]                                                   | 1399 |
| SAUSA300_0917 | putative membrane protein                                                                    | 1400 |
| SAUSA300_0058 | conserved hypothetical protein                                                               | 1401 |
| SAUSA300_1208 | conserved hypothetical protein                                                               | 1402 |
| SAUSA300_2647 | ribonuclease P protein component (rnpA) [3.1.26.5]                                           | 1403 |
| SAUSA300_2131 | conserved hypothetical protein                                                               | 1404 |
| SAUSA300_0334 | transcriptional regulator, MarR family                                                       | 1405 |
| SAUSA300_1746 | conserved hypothetical protein                                                               | 1406 |
| SAUSA300_0823 | hypothetical protein                                                                         | 1407 |
| SAUSA300_2181 | 50S ribosomal protein L36 (rpmJ)                                                             | 1408 |
| SAUSA300_0607 | conserved hypothetical protein                                                               | 1409 |
| SAUSA300_1717 | arsenical resistance operon repressor (arsR)                                                 | 1410 |
| SAUSA300_0480 | peptidyl-tRNA hydrolase (pth) [3.1.1.29]                                                     | 1411 |
| SAUSA300_1016 | protoheme IX farnesyltransferase (cyoE) [2.5.1.-]                                            | 1412 |
| SAUSA300_0940 | conserved hypothetical protein                                                               | 1413 |
| SAUSA300_2359 | amino acid ABC transporter, amino acid-binding<br>protein                                    | 1414 |



|               |                                                        |      |
|---------------|--------------------------------------------------------|------|
| SAUSA300_1499 | shikimate kinase (aroK) [2.7.1.71]                     | 1415 |
| SAUSA300_0385 | conserved hypothetical protein                         | 1416 |
| SAUSA300_1679 | acetyl-coenzyme A synthetase (acsA) [6.2.1.1]          | 1417 |
|               | hypoxanthine phosphoribosyltransferase (hpt)           |      |
| SAUSA300_0488 | [2.4.2.8]                                              | 1418 |
| SAUSA300_1377 | conserved hypothetical protein                         | 1419 |
| SAUSA300_1356 | 3-dehydroquinate synthase (aroB) [4.2.3.4]             | 1420 |
| SAUSA300_0057 | conserved hypothetical protein                         | 1421 |
| SAUSA300_1709 | transposase, degenerate                                | 1422 |
| SAUSA300_0767 | conserved hypothetical protein                         | 1423 |
| SAUSA300_1375 | conserved hypothetical protein                         | 1424 |
| SAUSA300_1924 | holin                                                  | 1425 |
| SAUSA300_0193 | conserved hypothetical protein                         | 1426 |
| SAUSA300_1117 | 50S ribosomal protein L28 (rpmB)                       | 1427 |
| SAUSA300_1573 | conserved hypothetical protein TIGR00250               | 1428 |
| SAUSA300_1949 | dUTP diphosphatase (dut) [3.6.1.23]                    | 1429 |
| SAUSA300_0956 | conserved hypothetical protein                         | 1430 |
| SAUSA300_1488 | conserved hypothetical protein                         | 1431 |
| SAUSA300_2185 | 50S ribosomal protein L15 (rplO)                       | 1432 |
| SAUSA300_2263 | putative transposase                                   | 1433 |
| SAUSA300_2452 | transcriptional regulator, MarR family                 | 1434 |
| SAUSA300_0376 | conserved hypothetical protein                         | 1435 |
|               | UDP-N-acetylmuramate--alanine ligase (murC)            |      |
| SAUSA300_1686 | [6.3.2.8]                                              | 1436 |
| SAUSA300_0112 | L-lactate permease (lctP)                              | 1437 |
| SAUSA300_2052 | single-stranded DNA- binding protein family            | 1438 |
| SAUSA300_2621 | conserved hypothetical protein                         | 1439 |
|               | respiratory nitrate reductase, gamma subunit (narI)    |      |
| SAUSA300_2340 | [1.7.99.4]                                             | 1440 |
|               | imidazole glycerol phosphate dehydratase hisB          |      |
| SAUSA300_2609 | (hisB) [4.2.1.19]                                      | 1441 |
| SAUSA300_1274 | peptide ABC transporter, ATP-binding protein           | 1442 |
| SAUSA300_1505 | conserved hypothetical protein                         | 1443 |
| SAUSA300_0713 | GTP cyclohydrolase I (folE) [3.5.4.16]                 | 1444 |
| SAUSA300_1963 | conserved hypothetical phage protein                   | 1445 |
| SAUSA300_0553 | conserved hypothetical protein                         | 1446 |
| SAUSA300_0692 | conserved hypothetical protein                         | 1447 |
| SAUSA300_1950 | conserved hypothetical phage protein                   | 1448 |
| SAUSA300_0392 | conserved hypothetical protein                         | 1449 |
| SAUSA300_0596 | arginyl-tRNA synthetase (argS) [6.1.1.19]              | 1450 |
| SAUSA300_0256 | holin-like protein lrgA                                | 1451 |
| SAUSA300_2635 | conserved hypothetical protein                         | 1452 |
| SAUSA300_0076 | ABC transporter, ATP-binding protein                   | 1453 |
| SAUSA300_1429 | phiSLT ORF53-like protein                              | 1454 |
|               | phiSLT ORF 50-like protein, similar to transcriptional |      |
| SAUSA300_1412 | activator rinB                                         | 1455 |
| SAUSA300_1054 | conserved hypothetical protein                         | 1456 |
| SAUSA300_1925 | phiPVL ORF17-like protein                              | 1457 |
| SAUSA300_2495 | copper chaperone copZ                                  | 1458 |
|               | capsular polysaccharide biosynthesis protein Cap5D,    |      |
| SAUSA300_0155 | authentic frameshift (cap5D)                           | 1459 |
| SAUSA300_1027 | 50S ribosomal protein L32 (rpmF)                       | 1460 |
| SAUSA300_1529 | diacylglycerol kinase (dgkA) [2.7.1.107]               | 1461 |
| SAUSA300_0090 | conserved hypothetical protein                         | 1462 |
|               | hydrolase, haloacid dehalogenase-like family           |      |
| SAUSA300_2464 | [1.6.99.3]                                             | 1463 |
| SAUSA300_0597 | putative endonuclease III                              | 1464 |
| SAUSA300_1643 | transposase, authentic frameshift                      | 1465 |
| SAUSA300_1268 | tryptophan synthase, alpha subunit (trpA) [4.2.1.20]   | 1466 |
|               | 3-phosphoshikimate 1-carboxyvinyltransferase           |      |
| SAUSA300_1355 | (aroA) [2.5.1.19]                                      | 1467 |

|               |                                                    |      |
|---------------|----------------------------------------------------|------|
|               | formamidopyrimidine-DNA glycosylase (mutM)         |      |
| SAUSA300_1635 | [3.2.2.23]                                         | 1468 |
| SAUSA300_0749 | conserved hypothetical protein                     | 1469 |
| SAUSA300_2488 | ferrous iron transport protein A (feoA)            | 1470 |
| SAUSA300_1484 | conserved hypothetical protein                     | 1471 |
| SAUSA300_1351 | conserved hypothetical protein                     | 1472 |
| SAUSA300_1099 | conserved hypothetical protein                     | 1473 |
| SAUSA300_2639 | cold shock protein                                 | 1474 |
| SAUSA300_1084 | conserved hypothetical protein                     | 1475 |
| SAUSA300_0458 | Orn/Lys/Arg decarboxylase [4.1.1.18]               | 1476 |
| SAUSA300_0931 | conserved hypothetical protein                     | 1477 |
| SAUSA300_0323 | conserved hypothetical protein                     | 1478 |
| SAUSA300_1601 | 50S ribosomal protein L27 (rpmA)                   | 1479 |
| SAUSA300_0660 | conserved hypothetical protein                     | 1480 |
| SAUSA300_0493 | dihydroneopterin aldolase (folB) [4.1.2.25]        | 1481 |
| SAUSA300_0378 | conserved hypothetical protein                     | 1482 |
| SAUSA300_2326 | transcription regulatory protein                   | 1483 |
| SAUSA300_0073 | peptide ABC transporter, peptide-binding protein   | 1484 |
| SAUSA300_2339 | conserved hypothetical protein                     | 1485 |
| SAUSA300_1422 | phiSLT ORF65-like protein                          | 1486 |
| SAUSA300_0009 | seryl-tRNA synthetase (serS) [6.1.1.11]            | 1487 |
| SAUSA300_0656 | conserved hypothetical protein                     | 1488 |
| SAUSA300_0315 | N-acetylneuraminase lyase subunit (nanA) [4.1.3.3] | 1489 |
| SAUSA300_1748 | transposase, authentic frameshift                  | 1490 |
| SAUSA300_2564 | tributyryl esterase (estA)                         | 1491 |
| SAUSA300_1116 | thiamine pyrophosphokinase [2.7.6.2]               | 1492 |
| SAUSA300_2595 | acetyltransferase, GNAT family                     | 1493 |
| SAUSA300_0544 | hydrolase, haloacid dehalogenase-like family       | 1494 |
| SAUSA300_0043 | conserved hypothetical protein                     | 1495 |
| SAUSA300_1493 | conserved hypothetical protein                     | 1496 |
|               | phenylalanyl-tRNA synthetase, beta subunit (pheT)  |      |
| SAUSA300_1038 | [6.1.1.20]                                         | 1497 |
| SAUSA300_1952 | phiPV083 ORF027-like protein                       | 1498 |
| SAUSA300_2221 | molybdopterin converting factor, subunit 1 (moaD)  | 1499 |
|               | nucleoside diphosphate kinase superfamily (ndk)    |      |
| SAUSA300_1358 | [2.7.4.6]                                          | 1500 |
| SAUSA300_1339 | conserved hypothetical protein                     | 1501 |
| SAUSA300_2337 | transcriptional regulator, DegU family             | 1502 |
| SAUSA300_0481 | transcription-repair coupling factor (mfd)         | 1503 |
| SAUSA300_2632 | putative membrane protein                          | 1504 |
| SAUSA300_0728 | conserved hypothetical protein                     | 1505 |
| SAUSA300_0842 | conserved hypothetical protein                     | 1506 |
| SAUSA300_1506 | conserved hypothetical protein                     | 1507 |
| SAUSA300_1406 | phiSLT ORF 104b-like protein                       | 1508 |
| SAUSA300_2309 | sensor histidine kinase                            | 1509 |
| SAUSA300_2066 | uracil phosphoribosyltransferase (upp) [2.4.2.9]   | 1510 |
| SAUSA300_1373 | ferredoxin                                         | 1511 |
| SAUSA300_2533 | pantoate--beta-alanine ligase (panC) [6.3.2.1]     | 1512 |
|               | NAD-dependent epimerase/dehydratase family         |      |
| SAUSA300_0130 | protein                                            | 1513 |
| SAUSA300_1877 | conserved hypothetical protein                     | 1514 |
| SAUSA300_0874 | conserved hypothetical protein                     | 1515 |
| SAUSA300_1849 | A/G-specific adenine glycosylase (mutY) [3.2.2.-]  | 1516 |
| SAUSA300_1277 | conserved hypothetical protein                     | 1517 |
| SAUSA300_2048 | hydroxyethylthiazole kinase (thiM) [2.7.1.50]      | 1518 |
|               | nitrite reductase [NAD(P)H], small subunit (nirD)  |      |
| SAUSA300_2345 | [1.7.1.4]                                          | 1519 |
| SAUSA300_1931 | phi77 ORF100-like protein                          | 1520 |
| SAUSA300_1161 | ribosomal protein L7Ae                             | 1521 |
| SAUSA300_0044 | metallo-beta-lactamase family protein              | 1522 |
| SAUSA300_2040 | putative membrane protein                          | 1523 |

|                  |                                                                    |      |
|------------------|--------------------------------------------------------------------|------|
| SAUSA300_0741    | excinuclease ABC, B subunit (uvrB)                                 | 1524 |
| SAUSA300_0263    | ribose permease (rbsD)                                             | 1525 |
| SAUSA300_2535    | 2-dehydropantoate 2-reductase (panE) [1.1.1.169]                   | 1526 |
| SAUSA300_0049    | hypothetical protein                                               | 1527 |
| SAUSA300_0331    | conserved hypothetical protein                                     | 1528 |
| SAUSA300_0321    | conserved hypothetical protein                                     | 1529 |
| SAUSA300_1853    | conserved hypothetical protein                                     | 1530 |
| SAUSA300_0884    | conserved hypothetical protein                                     | 1531 |
| SAUSA300_2331    | transcriptional regulator, MarR family                             | 1532 |
| SAUSA300_0556    | SIS domain protein                                                 | 1533 |
| SAUSA300_1294    | conserved hypothetical protein                                     | 1534 |
| SAUSA300_1206    | conserved hypothetical protein                                     | 1535 |
| SAUSA300_0827    | putative membrane protein                                          | 1536 |
| SAUSA300_1383    | phiSLT ORF484-like protein, lysin [3.5.1.28]                       | 1537 |
| SAUSA300_0363    | conserved hypothetical protein                                     | 1538 |
| SAUSA300_0490    | 33 kDa chaperonin (Heat shock protein 33 homolog)                  | 1539 |
| SAUSA300_1296    | conserved hypothetical protein                                     | 1540 |
| SAUSA300_2204    | 50S ribosomal protein L3 (rplC)                                    | 1541 |
| SAUSA300_1585    | conserved hypothetical protein                                     | 1542 |
| SAUSA300_2070    | conserved hypothetical protein                                     | 1543 |
| SAUSA300_0678    | putative membrane protein                                          | 1544 |
| SAUSA300_0465    | conserved hypothetical protein                                     | 1545 |
| SAUSA300_1271    | hydrolase-related protein                                          | 1546 |
| SAUSA300_0659    | sugar efflux transporter                                           | 1547 |
| SAUSA300_0353    | conserved hypothetical protein                                     | 1548 |
| SAUSA300_0520    | preprotein translocase, SecE subunit                               | 1549 |
| SAUSA300_2295    | conserved hypothetical protein                                     | 1550 |
| SAUSA300_2534    | 3-methyl-2-oxobutanoate hydroxymethyltransferase (panB) [2.1.2.11] | 1551 |
| SAUSA300_2338    | sensor histidine kinase                                            | 1552 |
| SAUSA300_2522    | conserved hypothetical protein                                     | 1553 |
| SAUSA300_1223    | conserved hypothetical protein                                     | 1554 |
| SAUSA300_1703    | rhodanese-like domain protein                                      | 1555 |
| SAUSA300_0618    | ABC transporter, substrate-binding protein                         | 1556 |
| SAUSA300_1921    | truncated amidase                                                  | 1557 |
| SAUSA300_0700    | conserved hypothetical protein                                     | 1558 |
| SAUSA300_1958    | Single-strand binding protein                                      | 1559 |
| SAUSA300_2401    | addiction module toxin, Txe/YoeB family                            | 1560 |
| SAUSA300_0977    | cobalt transport family protein                                    | 1561 |
| SAUSA300_2266    | conserved hypothetical protein                                     | 1562 |
| SAUSA300_1511    | 50S ribosomal protein L33 (rpmG)                                   | 1563 |
| SAUSA300_1980    | acetyltransferase, GNAT family                                     | 1564 |
| SAUSA300_1409    | conserved hypothetical phage protein                               | 1565 |
| SAUSA300_0181-s2 | non-ribosomal peptide synthetase                                   | 1566 |
| SAUSA300_1882    | aspartyl/glutamyl-tRNA amidotransferase subunit C (gatC) [6.3.5.-] | 1567 |
| SAUSA300_2423    | conserved hypothetical protein                                     | 1568 |
| SAUSA300_1404    | phiSLT ORF 563-like protein, terminase, large subunit              | 1569 |
| SAUSA300_0173    | conserved hypothetical protein                                     | 1570 |
| SAUSA300_1380    | conserved hypothetical protein                                     | 1571 |
| SAUSA300_0878    | transcriptional regulator, LysR family                             | 1572 |
| SAUSA300_0476    | hypothetical protein                                               | 1573 |
| SAUSA300_2094    | conserved hypothetical protein                                     | 1574 |
| SAUSA300_1867    | conserved hypothetical protein                                     | 1575 |
| SAUSA300_1279    | phosphate transport system regulatory protein PhoU (phoU)          | 1576 |
| SAUSA300_1626    | 50S ribosomal protein L35 (rpmI)                                   | 1577 |
| SAUSA300_0063    | cyclic nucleotide-binding domain protein                           | 1578 |
| SAUSA300_2450    | DedA family protein                                                | 1579 |
| SAUSA300_1318    | DegV family protein                                                | 1580 |

|               |                                                                                                                 |      |
|---------------|-----------------------------------------------------------------------------------------------------------------|------|
| SAUSA300_1419 | phiSLT ORF80-like protein                                                                                       | 1581 |
| SAUSA300_1213 | conserved hypothetical protein                                                                                  | 1582 |
| SAUSA300_2245 | staphylococcal accessory regulator R                                                                            | 1583 |
| SAUSA300_2222 | molybdopterin converting factor, subunit 2 (moaE)                                                               | 1584 |
| SAUSA300_2218 | staphylococcal accessory regulator                                                                              | 1585 |
| SAUSA300_1088 | glyoxalase family protein [4.4.1.5]                                                                             | 1586 |
| SAUSA300_2091 | purine nucleoside phosphorylase (deoD) [2.4.2.1]                                                                | 1587 |
| SAUSA300_1017 | conserved hypothetical protein                                                                                  | 1588 |
| SAUSA300_2042 | conserved hypothetical protein                                                                                  | 1589 |
| SAUSA300_1479 | conserved hypothetical protein                                                                                  | 1590 |
| pUSA01_0003   | putative membrane protein                                                                                       | 1591 |
| SAUSA300_1967 | conserved hypothetical phage protein                                                                            | 1592 |
| SAUSA300_0236 | PTS system, IIBC components [2.7.1.69]                                                                          | 1593 |
| SAUSA300_2029 | conserved hypothetical protein                                                                                  | 1594 |
| SAUSA300_2480 | transcriptional regulator, LysR family                                                                          | 1595 |
| SAUSA300_1723 | conserved hypothetical protein                                                                                  | 1596 |
| SAUSA300_0207 | conserved hypothetical protein                                                                                  | 1597 |
| SAUSA300_0278 | conserved hypothetical protein                                                                                  | 1598 |
| SAUSA300_2389 | putative drug transporter                                                                                       | 1599 |
| SAUSA300_0576 | putative Pyridine nucleotide-disulphide oxidoreductase                                                          | 1600 |
| SAUSA300_2617 | putative cobalt ABC transporter, ATP-binding protein                                                            | 1601 |
| SAUSA300_1222 | thermonuclease (nuc) [3.1.31.1]                                                                                 | 1602 |
| SAUSA300_2272 | conserved hypothetical protein                                                                                  | 1603 |
| SAUSA300_2511 | conserved hypothetical protein                                                                                  | 1604 |
| SAUSA300_0290 | putative lipoprotein                                                                                            | 1605 |
| SAUSA300_1392 | phiSLT ORF191-like protein                                                                                      | 1606 |
| SAUSA300_0484 | conserved hypothetical protein                                                                                  | 1607 |
| SAUSA300_1857 | conserved hypothetical protein                                                                                  | 1608 |
| SAUSA300_2648 | 50S ribosomal protein L34 (rpmH)                                                                                | 1609 |
| SAUSA300_1035 | conserved hypothetical protein                                                                                  | 1610 |
| SAUSA300_1100 | conserved hypothetical protein                                                                                  | 1611 |
| SAUSA300_2212 | conserved hypothetical protein                                                                                  | 1612 |
| SAUSA300_1738 | putative lipoprotein                                                                                            | 1613 |
| SAUSA300_1126 | ribonuclease III (rnc) [3.1.26.3]                                                                               | 1614 |
| SAUSA300_0431 | conserved hypothetical protein                                                                                  | 1615 |
| SAUSA300_0804 | putative transcriptional regulator                                                                              | 1616 |
| SAUSA300_1366 | conserved hypothetical protein                                                                                  | 1617 |
| SAUSA300_1251 | DNA topoisomerase IV, subunit A (parC) [5.99.1.-] glutamate-1-semialdehyde-2,1-aminomutase (hemL) [5.4.3.8]     | 1618 |
| SAUSA300_1614 | conserved hypothetical protein                                                                                  | 1619 |
| SAUSA300_2077 | conserved hypothetical protein                                                                                  | 1620 |
| SAUSA300_1844 | bacterioferritin comigratory protein [1.11.1.-]                                                                 | 1621 |
| SAUSA300_1215 | conserved hypothetical protein                                                                                  | 1622 |
| SAUSA300_0100 | staphylococcus tandem lipoprotein                                                                               | 1623 |
| SAUSA300_0614 | putative Na <sup>+</sup> /H <sup>+</sup> antiporter, MnhE component                                             | 1624 |
| SAUSA300_0875 | conserved hypothetical protein                                                                                  | 1625 |
| SAUSA300_0628 | teichoic acid biosynthesis protein D [2.7.7.39]                                                                 | 1626 |
| SAUSA300_0667 | Yail/YqxD family protein                                                                                        | 1627 |
| SAUSA300_1485 | conserved hypothetical protein                                                                                  | 1628 |
| SAUSA300_1231 | gamma-aminobutyrate permease                                                                                    | 1629 |
| SAUSA300_2352 | addiction module toxin, Txe/YoeB family                                                                         | 1630 |
| SAUSA300_0365 | conserved hypothetical protein                                                                                  | 1631 |
| SAUSA300_0011 | conserved hypothetical protein                                                                                  | 1632 |
| SAUSA300_1233 | 50S ribosomal protein L33 (rpmG)                                                                                | 1633 |
| SAUSA300_0688 | oxidoreductase, aldo/keto reductase family glycine betaine/carnitine/choline ABC transporter (opuCb) [3.6.3.32] | 1634 |
| SAUSA300_2392 | conserved hypothetical protein                                                                                  | 1635 |
| SAUSA300_1384 | phiSLT ORF100b-like protein, holin                                                                              | 1636 |
| SAUSA300_1554 | conserved hypothetical protein                                                                                  | 1637 |

|               |                                                                       |      |
|---------------|-----------------------------------------------------------------------|------|
| SAUSA300_1721 | conserved hypothetical protein                                        | 1638 |
| SAUSA300_1184 | conserved hypothetical protein                                        | 1639 |
| SAUSA300_0961 | quinol oxidase, subunit III (qoxC) [1.9.3.-]                          | 1640 |
| SAUSA300_2180 | 30S ribosomal protein S13 (rpsM)                                      | 1641 |
| SAUSA300_0010 | putative membrane protein                                             | 1642 |
| pUSA03_0035   | conserved hypothetical protein                                        | 1643 |
| SAUSA300_0066 | arginine repressor (argR)                                             | 1644 |
| SAUSA300_0428 | conserved hypothetical protein                                        | 1645 |
| SAUSA300_2133 | transporter gate domain protein                                       | 1646 |
| SAUSA300_0135 | Superoxide dismutase (Mn/Fe family) [1.15.1.1]                        | 1647 |
| SAUSA300_1212 | conserved hypothetical protein                                        | 1648 |
| SAUSA300_2594 | methionine-S-sulfoxide reductase (msrA) [1.8.4.6]                     | 1649 |
| SAUSA300_1953 | phiPVL ORF051-like protein                                            | 1650 |
| SAUSA300_2195 | 30S ribosomal protein S17 (rpsQ)                                      | 1651 |
| SAUSA300_1909 | conserved hypothetical protein                                        | 1652 |
| SAUSA300_0585 | conserved hypothetical protein                                        | 1653 |
| SAUSA300_2257 | conserved hypothetical protein                                        | 1654 |
| SAUSA300_0840 | conserved hypothetical protein                                        | 1655 |
| SAUSA300_2571 | arginine repressor (argR)                                             | 1656 |
| SAUSA300_2145 | glycine betaine transporter                                           | 1657 |
| SAUSA300_0697 | exsB protein                                                          | 1658 |
| SAUSA300_2615 | conserved hypothetical protein                                        | 1659 |
| SAUSA300_0831 | conserved hypothetical protein                                        | 1660 |
| SAUSA300_0158 | capsular polysaccharide biosynthesis protein Cap5G (cap5G) [5.1.3.14] | 1661 |
| SAUSA300_0027 | conserved hypothetical protein                                        | 1662 |
| SAUSA300_2287 | putative membrane protein                                             | 1663 |
| SAUSA300_1726 | crcB family protein                                                   | 1664 |
| SAUSA300_0342 | conserved hypothetical protein                                        | 1665 |
| SAUSA300_1470 | geranyltranstransferase [2.5.1.10]                                    | 1666 |
| SAUSA300_0067 | universal stress protein family                                       | 1667 |
| SAUSA300_0832 | conserved hypothetical protein                                        | 1668 |
| SAUSA300_2451 | drug transporter                                                      | 1669 |
| SAUSA300_1324 | putative membrane protein                                             | 1670 |
| SAUSA300_0350 | transcriptional regulator, Cro/Ci family-related protein              | 1671 |
| SAUSA300_1943 | phi77 ORF040-like protein                                             | 1672 |
| SAUSA300_1211 | conserved hypothetical protein                                        | 1673 |
| SAUSA300_0148 | conserved hypothetical protein                                        | 1674 |
| SAUSA300_0216 | hexose phosphate transport protein (uhpT)                             | 1675 |
| SAUSA300_2152 | tagatose 1,6-diphosphate aldolase (lacD) [4.1.2.40]                   | 1676 |
| SAUSA300_2274 | putative membrane protein                                             | 1677 |
| SAUSA300_0916 | conserved hypothetical protein                                        | 1678 |
| SAUSA300_0075 | oligopeptide permease, channel-forming protein (opp-3C)               | 1679 |
| SAUSA300_1586 | aspartyl-tRNA synthetase (aspS) [6.1.1.12]                            | 1680 |
| SAUSA300_1109 | methionyl-tRNA formyltransferase (fmt) [2.1.2.9]                      | 1681 |
| SAUSA300_1948 | phi77 ORF069-like protein                                             | 1682 |
| SAUSA300_0393 | conserved hypothetical protein                                        | 1683 |
| SAUSA300_1666 | 30S ribosomal protein S4 (rpsD)                                       | 1684 |
| SAUSA300_1656 | universal stress protein family                                       | 1685 |
| SAUSA300_2460 | acetyltransferase family protein                                      | 1686 |
| SAUSA300_1805 | RNA methyltransferase                                                 | 1687 |
| SAUSA300_1545 | 30S ribosomal protein S20 (rpsT)                                      | 1688 |
| SAUSA300_1229 | hydrolase, haloacid dehalogenase-like family [3.8.1.-]                | 1689 |
| SAUSA300_1602 | conserved hypothetical protein                                        | 1690 |
| pUSA03_0023   | transfer complex protein TraO (traO)                                  | 1691 |
| SAUSA300_0819 | FeS assembly protein SufD (sufD)                                      | 1692 |
| SAUSA300_1650 | conserved hypothetical protein                                        | 1693 |
| SAUSA300_1535 | 30S ribosomal protein S21 (rpsU)                                      | 1694 |

|               |                                                                                         |      |
|---------------|-----------------------------------------------------------------------------------------|------|
| SAUSA300_0276 | putative membrane protein                                                               | 1695 |
| SAUSA300_1359 | polyprenyl synthetase                                                                   | 1696 |
| SAUSA300_2031 | conserved hypothetical protein                                                          | 1697 |
| SAUSA300_0054 | hypothetical protein                                                                    | 1698 |
| SAUSA300_2418 | conserved hypothetical protein                                                          | 1699 |
| SAUSA300_0872 | conserved hypothetical protein                                                          | 1700 |
| SAUSA300_2005 | conserved hypothetical protein                                                          | 1701 |
| SAUSA300_1103 | DNA-directed RNA polymerase, omega subunit (rpoZ) [2.7.7.6]                             | 1702 |
| SAUSA300_1292 | alanine racemase (alr2) [5.1.1.1]                                                       | 1703 |
| SAUSA300_1288 | dihydrodipicolinate synthase (dapA) [4.2.1.52]                                          | 1704 |
| SAUSA300_0470 | dimethyladenosine transferase (ksgA) [2.1.1.-]                                          | 1705 |
| SAUSA300_0752 | ATP-dependent Clp protease, proteolytic subunit ClpP (clpP) [3.4.21.92]                 | 1706 |
| SAUSA300_2107 | PTS system, mannitol specific IIA component (mtIA) [2.7.1.69]                           | 1707 |
| SAUSA300_0969 | phosphoribosylformylglycinamide synthase (purS)                                         | 1708 |
| SAUSA300_1700 | polysaccharide biosynthesis protein                                                     | 1709 |
| SAUSA300_0572 | mevalonate kinase (mvk) [2.7.1.36]                                                      | 1710 |
| SAUSA300_2252 | conserved hypothetical protein                                                          | 1711 |
| SAUSA300_1190 | glycerol uptake operon antiterminator regulatory protein (glpP)                         | 1712 |
| SAUSA300_1264 | anthranilate phosphoribosyltransferase (trpD) [2.4.2.18]                                | 1713 |
| SAUSA300_0150 | transposase, degenerate                                                                 | 1714 |
| SAUSA300_2375 | ABC transporter, ATP-binding/permease protein                                           | 1715 |
| pUSA01_0001   | replication protein                                                                     | 1716 |
| SAUSA300_2264 | phosphosugar-binding transcriptional regulator, RpiR family                             | 1717 |
| SAUSA300_1118 | conserved hypothetical protein                                                          | 1718 |
| SAUSA300_2388 | 2-dehydropantoate 2-reductase (panE) [1.1.1.169]                                        | 1719 |
| SAUSA300_0855 | Na(+)/H(+) antiporter subunit A (mnhA)                                                  | 1720 |
| SAUSA300_1572 | conserved hypothetical protein                                                          | 1721 |
| SAUSA300_1436 | phiSLT ORF144-like protein, putative lipoprotein                                        | 1722 |
| SAUSA300_0322 | NADH-dependent flavin oxidoreductase, Oye family [1.-.-.]                               | 1723 |
| SAUSA300_1051 | conserved hypothetical protein                                                          | 1724 |
| SAUSA300_0140 | deoxyribose-phosphate aldolase (deoC) [4.1.2.4]                                         | 1725 |
| SAUSA300_0084 | conserved hypothetical protein                                                          | 1726 |
| SAUSA300_2446 | conserved hypothetical protein                                                          | 1727 |
| SAUSA300_0803 | transcriptional regulator, Cro/Ci family                                                | 1728 |
| SAUSA300_0394 | FAD/NAD(P)-binding Rossmann fold Superfamily                                            | 1729 |
| SAUSA300_1628 | lysine-specific permease (lysP)                                                         | 1730 |
| SAUSA300_1312 | acetyltransferase, GNAT family                                                          | 1731 |
| SAUSA300_0302 | conserved hypothetical protein                                                          | 1732 |
| SAUSA300_0698 | para-aminobenzoate synthase, glutamine amidotransferase, component II (pabA) [4.1.3.27] | 1733 |
| SAUSA300_0626 | teichoic acid biosynthesis protein B (tagB)                                             | 1734 |
| SAUSA300_0459 | thymidylate kinase (tmk) [2.7.4.9]                                                      | 1735 |
| SAUSA300_1154 | phosphatidate cytidyltransferase (cdsA) [2.7.7.41]                                      | 1736 |
| SAUSA300_1414 | phiSLT ORF 78B-like protein                                                             | 1737 |
| SAUSA300_0784 | LysE/YggA family protein                                                                | 1738 |
| SAUSA300_1244 | large conductance mechanosensitive channel protein (mscL)                               | 1739 |
| SAUSA300_2232 | acetyltransferase, GNAT family                                                          | 1740 |
| SAUSA300_1536 | conserved hypothetical protein                                                          | 1741 |
| SAUSA300_1736 | conserved hypothetical protein                                                          | 1742 |
| SAUSA300_2058 | ATP synthase F1, beta subunit (atpD) [3.6.3.14]                                         | 1743 |
| SAUSA300_0429 | PAP2 family protein                                                                     | 1744 |
| SAUSA300_0669 | undecaprenol kinase [2.7.1.66]                                                          | 1745 |

|                  |                                                      |      |
|------------------|------------------------------------------------------|------|
|                  | respiratory nitrate reductase, alpha subunit         |      |
| SAUSA300_2343-s3 | [1.7.99.4]                                           | 1746 |
| SAUSA300_2174    | cobalt transport family protein                      | 1747 |
|                  | branched-chain amino acid transport system II        |      |
| SAUSA300_0188    | carrier protein (brnQ)                               | 1748 |
| SAUSA300_0096    | conserved hypothetical protein                       | 1749 |
| SAUSA300_0843    | conserved hypothetical protein                       | 1750 |
| SAUSA300_1316    | methionine-R-sulfoxide reductase (msrB) [1.8.4.-]    | 1751 |
| SAUSA300_0870-s3 | exonuclease RexA (rexA)                              | 1752 |
| SAUSA300_0577    | putative transcriptional regulator                   | 1753 |
| SAUSA300_0253    | ScdA protein (scdA)                                  | 1754 |
| SAUSA300_1115    | ribose-phosphate 3-epimerase (rpe) [5.1.3.1]         | 1755 |
| SAUSA300_1668    | OsmC/Ohr family protein                              | 1756 |
| SAUSA300_0267    | transposase                                          | 1757 |
| SAUSA300_0422    | conserved hypothetical protein                       | 1758 |
| SAUSA300_0257    | Antiholin-like protein IrgB.                         | 1759 |
| SAUSA300_0813    | conserved hypothetical protein                       | 1760 |
| SAUSA300_0778    | conserved hypothetical protein                       | 1761 |
| SAUSA300_0020    | DNA-binding response regulator                       | 1762 |
| SAUSA300_1379    | putative lipoprotein                                 | 1763 |
| SAUSA300_1317    | methionine-S-sulfoxide reductase (msrA) [1.8.4.6]    | 1764 |
| SAUSA300_0109    | integral membrane domain protein                     | 1765 |
| SAUSA300_1129    | conserved hypothetical protein                       | 1766 |
| SAUSA300_1191    | glycerol uptake facilitator (glpF)                   | 1767 |
| SAUSA300_2633    | ABC transporter, ATP-binding protein                 | 1768 |
| SAUSA300_0802    | conserved hypothetical protein                       | 1769 |
| SAUSA300_0594    | alcohol dehydrogenase (adh) [1.1.1.1]                | 1770 |
| SAUSA300_2203    | 50S ribosomal protein L4 (rplD)                      | 1771 |
| SAUSA300_0851    | Na(+)/H(+) antiporter subunit E (mnhE)               | 1772 |
| SAUSA300_0983    | phosphocarrier protein HPr (ptsH)                    | 1773 |
| SAUSA300_1875    | exonuclease                                          | 1774 |
| SAUSA300_2236    | conserved hypothetical protein                       | 1775 |
| SAUSA300_2246    | conserved hypothetical protein                       | 1776 |
| SAUSA300_1747    | conserved hypothetical protein                       | 1777 |
| SAUSA300_0990    | conserved hypothetical protein                       | 1778 |
| SAUSA300_2234    | Inosine-uridine preferring nucleoside hydrolase      | 1779 |
| SAUSA300_0639    | conserved hypothetical protein                       | 1780 |
|                  | 6-pyruvoyl tetrahydrobiopterin synthase-like protein |      |
| SAUSA300_0696    | [4.2.3.12]                                           | 1781 |
| SAUSA300_0389    | GMP synthase (guaA) [6.3.5.2]                        | 1782 |
| SAUSA300_2043    | conserved hypothetical protein                       | 1783 |
| SAUSA300_1003    | conserved hypothetical protein                       | 1784 |
| SAUSA300_0985    | conserved hypothetical protein                       | 1785 |
| SAUSA300_0868    | signal peptidase IB (spsB) [3.4.21.89]               | 1786 |
| SAUSA300_2317    | putative zinc-binding dehydrogenase                  | 1787 |
| SAUSA300_0799    | integrase (int)                                      | 1788 |
| SAUSA300_0366    | ribosomal protein S6 (rpsF)                          | 1789 |
| SAUSA300_0689    | glycosyl transferase, group 2 family protein         | 1790 |
| SAUSA300_2547    | conserved hypothetical protein                       | 1791 |
| SAUSA300_2025    | sigma-B regulation protein (rsbU)                    | 1792 |
| SAUSA300_2593    | conserved hypothetical protein                       | 1793 |
| SAUSA300_2369    | 6-carboxyhexanoate--CoA ligase                       | 1794 |
| SAUSA300_0381    | putative NAD(P)H-flavin oxidoreductase               | 1795 |
| SAUSA300_2532    | aspartate 1-decarboxylase (panD) [4.1.1.11]          | 1796 |
| SAUSA300_2260    | inositol monophosphatase family protein [3.1.3.25]   | 1797 |
| SAUSA300_0652    | putative membrane protein                            | 1798 |
| SAUSA300_2182    | translation initiation factor IF-1 (infA)            | 1799 |
|                  | branched-chain amino acid aminotransferase (ilvE)    |      |
| SAUSA300_0539    | [2.6.1.42]                                           | 1800 |
| SAUSA300_0304    | conserved hypothetical protein                       | 1801 |
| SAUSA300_1010    | conserved hypothetical protein                       | 1802 |

|               |                                                                  |      |
|---------------|------------------------------------------------------------------|------|
| SAUSA300_0518 | conserved hypothetical protein                                   | 1803 |
| SAUSA300_0464 | Methyltransferase                                                | 1804 |
|               | PTS system, arbutin-like IIBC component (glvC)                   |      |
| SAUSA300_2270 | [2.7.1.69]                                                       | 1805 |
| SAUSA300_0725 | conserved hypothetical protein                                   | 1806 |
| SAUSA300_1861 | conserved hypothetical protein                                   | 1807 |
| SAUSA300_0036 | conserved hypothetical protein                                   | 1808 |
| SAUSA300_1847 | conserved hypothetical protein                                   | 1809 |
| SAUSA300_0516 | conserved hypothetical protein                                   | 1810 |
| SAUSA300_2167 | conserved hypothetical protein                                   | 1811 |
| SAUSA300_0586 | conserved hypothetical protein                                   | 1812 |
| SAUSA300_1854 | regulatory protein RecX                                          | 1813 |
| pUSA03_0006   | Replication and maintenance protein                              | 1814 |
| SAUSA300_0997 | conserved hypothetical protein                                   | 1815 |
|               | PTS system, lactose-specific IIA component (IacF)                |      |
| SAUSA300_2151 | [2.7.1.69]                                                       | 1816 |
| pUSA03_0015   | transfer complex protein TraF (traF)                             | 1817 |
| SAUSA300_0900 | putative competence protein                                      | 1818 |
|               | PTS system, galactitol-specific enzyme II, B                     |      |
| SAUSA300_0240 | component [2.7.1.69]                                             | 1819 |
| SAUSA300_0673 | cobalamin synthesis protein/P47K family protein                  | 1820 |
| SAUSA300_0695 | radical activating enzyme family protein                         | 1821 |
| SAUSA300_1420 | conserved hypothetical phage protein                             | 1822 |
| SAUSA300_1321 | conserved hypothetical protein                                   | 1823 |
| SAUSA300_2147 | alcohol dehydrogenase, zinc-containing                           | 1824 |
| SAUSA300_0530 | ribosomal protein S12 (rpsL)                                     | 1825 |
| SAUSA300_1806 | putative iron-sulfur cluster-binding protein                     | 1826 |
| SAUSA300_0780 | conserved hypothetical protein                                   | 1827 |
| SAUSA300_1661 | thiamine biosynthesis protein Thil (thil)                        | 1828 |
| SAUSA300_0371 | conserved hypothetical protein                                   | 1829 |
| SAUSA300_0285 | conserved hypothetical protein                                   | 1830 |
| SAUSA300_0807 | conserved hypothetical protein                                   | 1831 |
| SAUSA300_2171 | 30S ribosomal protein S9 (rpsI)                                  | 1832 |
|               | D-3-phosphoglycerate dehydrogenase (serA)                        |      |
| SAUSA300_1670 | [1.1.1.95]                                                       | 1833 |
| SAUSA300_1977 | conserved hypothetical protein                                   | 1834 |
| SAUSA300_1933 | hypothetical phage protein                                       | 1835 |
|               | branched-chain amino acid transport system II                    |      |
| SAUSA300_0306 | carrier protein (brnQ)                                           | 1836 |
| SAUSA300_0555 | putative hexulose-6-phosphate synthase                           | 1837 |
| SAUSA300_0332 | PTS system, IIA component                                        | 1838 |
| SAUSA300_2057 | ATP synthase F1, epsilon subunit (atpC) [3.6.3.14]               | 1839 |
| SAUSA300_1552 | conserved hypothetical protein                                   | 1840 |
| SAUSA300_0979 | conserved hypothetical protein                                   | 1841 |
|               | hydrolase, alpha/beta hydrolase fold family                      |      |
| SAUSA300_0604 | [3.4.11.5]                                                       | 1842 |
| SAUSA300_0786 | OsmC/Ohr family protein                                          | 1843 |
|               | exodeoxyribonuclease VII, large subunit (xseA)                   |      |
| SAUSA300_1472 | [3.1.11.6]                                                       | 1844 |
| SAUSA300_2032 | K <sup>+</sup> -transporting ATPase, C subunit (kdpC) [3.6.3.12] | 1845 |
|               | deoxynucleoside kinase family protein [2.7.1.-                   |      |
| SAUSA300_0542 | 2.7.1.113]                                                       | 1846 |
| SAUSA300_0672 | transcriptional regulator, MarR family                           | 1847 |
| SAUSA300_1604 | rod shape-determining protein MreD (mreD)                        | 1848 |
| SAUSA300_1238 | conserved hypothetical protein                                   | 1849 |
|               | phosphoribosylaminoimidazole carboxylase,                        |      |
| SAUSA300_0966 | catalytic subunit (purE) [4.1.1.21]                              | 1850 |
| SAUSA300_0641 | putative lipase/esterase                                         | 1851 |
| SAUSA300_1410 | virulence-associated protein E                                   | 1852 |
| SAUSA300_1690 | putative thioredoxin                                             | 1853 |
| SAUSA300_0495 | hypothetical protein                                             | 1854 |



|               |                                                                |      |
|---------------|----------------------------------------------------------------|------|
| SAUSA300_0912 | trans-2-enoyl-ACP reductase [1.3.1.9]                          | 1855 |
| SAUSA300_2502 | conserved hypothetical protein                                 | 1856 |
| SAUSA300_0111 | conserved hypothetical protein                                 | 1857 |
| SAUSA300_2194 | 50S ribosomal protein L14 (rplN)                               | 1858 |
| SAUSA300_2410 | oligopeptide ABC transporter, permease protein                 | 1859 |
| SAUSA300_0340 | NADH-dependent FMN reductase                                   | 1860 |
| SAUSA300_1787 | HIT family protein                                             | 1861 |
| SAUSA300_2443 | gluconate kinase (gntK) [2.7.1.12]                             | 1862 |
| SAUSA300_1665 | conserved hypothetical protein                                 | 1863 |
| SAUSA300_2582 | conserved hypothetical protein                                 | 1864 |
| SAUSA300_2160 | transcriptional regulator, MerR family                         | 1865 |
|               | lantibiotic epidermin leader peptide processing                |      |
| SAUSA300_1763 | serine protease EpiP (epiP) [3.4.21.-]                         | 1866 |
| SAUSA300_2379 | putative transporter protein                                   | 1867 |
| SAUSA300_0513 | glutamyl-tRNA synthetase (gltX) [6.1.1.17]                     | 1868 |
| SAUSA300_0679 | conserved hypothetical protein                                 | 1869 |
| SAUSA300_1386 | phiETA ORF59-like protein                                      | 1870 |
| SAUSA300_1734 | conserved hypothetical protein                                 | 1871 |
| SAUSA300_2624 | putative membrane protein                                      | 1872 |
| SAUSA300_1337 | conserved hypothetical protein                                 | 1873 |
| SAUSA300_0930 | lipoate-protein ligase A family protein [6.3.4.-]              | 1874 |
| SAUSA300_2548 | conserved hypothetical protein                                 | 1875 |
| SAUSA300_0909 | pseudouridine synthases, RluA subfamily                        | 1876 |
| SAUSA300_1797 | conserved hypothetical protein                                 | 1877 |
| SAUSA300_1551 | conserved hypothetical protein                                 | 1878 |
| SAUSA300_2407 | oligopeptide ABC transporter, ATP-binding protein              | 1879 |
| SAUSA300_2453 | ABC transporter, ATP-binding protein                           | 1880 |
| SAUSA300_2300 | transcriptional regulator, TetR family                         | 1881 |
| SAUSA300_1914 | GntR family regulatory protein                                 | 1882 |
| SAUSA300_0953 | putative membrane protein                                      | 1883 |
| SAUSA300_1174 | conserved hypothetical protein                                 | 1884 |
| SAUSA300_0149 | replication initiation protein, degenerate                     | 1885 |
| SAUSA300_1912 | putative membrane protein                                      | 1886 |
|               | spermidine/putrescine ABC transporter, permease protein (potC) |      |
| SAUSA300_1001 |                                                                | 1887 |
| SAUSA300_1463 | conserved hypothetical protein                                 | 1888 |
| SAUSA300_1642 | D-serine/D-alanine/glycine transporter                         | 1889 |
| SAUSA300_0042 | conserved hypothetical protein                                 | 1890 |
| SAUSA300_0368 | ribosomal protein S18 (rpsR)                                   | 1891 |
| SAUSA300_0587 | conserved hypothetical protein                                 | 1892 |
| SAUSA300_0468 | hydrolase, TatD family [3.1.21.-]                              | 1893 |
| SAUSA300_2238 | urease, gamma subunit (ureA) [3.5.1.5]                         | 1894 |
| SAUSA300_0957 | conserved hypothetical protein                                 | 1895 |
| SAUSA300_0442 | YibE/F-like protein                                            | 1896 |
| SAUSA300_1458 | glyoxalase family protein [4.4.1.5]                            | 1897 |
| SAUSA300_2611 | histidinol dehydrogenase hisD (hisD) [1.1.1.23]                | 1898 |
| SAUSA300_0486 | polyribonucleotide nucleotidyltransferase [2.7.7.8]            | 1899 |
| SAUSA300_1743 | conserved hypothetical protein                                 | 1900 |
| SAUSA300_1523 | conserved hypothetical protein                                 | 1901 |
| SAUSA300_0097 | conserved hypothetical protein                                 | 1902 |
| SAUSA300_0169 | conserved hypothetical protein                                 | 1903 |
|               | phi77 ORF003-like protein, phage terminase, large subunit      |      |
| SAUSA300_1941 |                                                                | 1904 |
| SAUSA300_0954 | transcriptional regulator, MarR family                         | 1905 |
| SAUSA300_2211 | putative membrane protein                                      | 1906 |
| SAUSA300_1591 | adenine phosphoribosyltransferase (apt) [2.4.2.7]              | 1907 |
| SAUSA300_1303 | conserved hypothetical protein                                 | 1908 |
|               | lantibiotic epidermin biosynthesis protein EpiA (epiA)         |      |
| SAUSA300_1767 |                                                                | 1909 |
| SAUSA300_1044 | thioredoxin (trx)                                              | 1910 |
| SAUSA300_1955 | putative endodeoxyribonuclease RusA                            | 1911 |

|               |                                                                                     |      |
|---------------|-------------------------------------------------------------------------------------|------|
| SAUSA300_2198 | 30S ribosomal protein S3 (rpsC)                                                     | 1912 |
| SAUSA300_0525 | ribosomal protein L7/L12 (rplL)                                                     | 1913 |
| SAUSA300_2417 | putative transporter                                                                | 1914 |
| SAUSA300_0591 | acetyltransferase, GNAT family                                                      | 1915 |
| SAUSA300_1618 | hemA concentration negative effector hemX (hemX)                                    | 1916 |
| SAUSA300_1708 | staphylococcal accessory regulator Rot (rot)                                        | 1917 |
| SAUSA300_2028 | holo-(acyl-carrier-protein) synthase (acpS) [2.7.8.7]                               | 1918 |
| SAUSA300_1546 | DNA polymerase III, delta subunit (hoIA) [2.7.7.7]                                  | 1919 |
| SAUSA300_2376 | conserved hypothetical protein                                                      | 1920 |
| SAUSA300_1013 | cell division protein, FtsW/RodA/SpoVE family                                       | 1921 |
| SAUSA300_0623 | teichoic acid biosynthesis protein (tagA) [2.4.1.187]                               | 1922 |
| SAUSA300_1421 | phiSLT ORF122-like protein, DNA polymerase                                          | 1923 |
| SAUSA300_2409 | oligopeptide ABC transporter, permease protein                                      | 1924 |
| SAUSA300_1478 | putative lipoprotein                                                                | 1925 |
| SAUSA300_0565 | conserved hypothetical protein                                                      | 1926 |
| SAUSA300_1761 | lantibiotic epidermin immunity protein F (epiE)                                     | 1927 |
| SAUSA300_2459 | transcriptional regulator, MarR family                                              | 1928 |
| SAUSA300_0440 | MutT/nudix family protein [3.6.1.-]                                                 | 1929 |
| SAUSA300_1134 | 50S ribosomal protein L19 (rplS)                                                    | 1930 |
| SAUSA300_0564 | conserved hypothetical protein                                                      | 1931 |
| SAUSA300_2518 | hydrolase family protein                                                            | 1932 |
| SAUSA300_1110 | ribosomal RNA small subunit methyltransferase B (sun) [2.1.1.-]                     | 1933 |
| SAUSA300_0768 | conserved hypothetical protein                                                      | 1934 |
| SAUSA300_2036 | DNA-binding response regulator, KdpE (kdpE) [2.7.3.- ]                              | 1935 |
| SAUSA300_0567 | conserved hypothetical protein                                                      | 1936 |
| SAUSA300_0590 | conserved hypothetical protein                                                      | 1937 |
| SAUSA300_0180 | integral membrane protein LmrP                                                      | 1938 |
| SAUSA300_1072 | protein mraZ (mraZ)                                                                 | 1939 |
| SAUSA300_1632 | conserved hypothetical protein                                                      | 1940 |
| SAUSA300_0110 | transcriptional regulator, GntR family/aminotransferase, class I                    | 1941 |
| SAUSA300_0281 | conserved hypothetical protein                                                      | 1942 |
| SAUSA300_0863 | argininosuccinate lyase (argH) [4.3.2.1]                                            | 1943 |
| SAUSA300_2242 | urease accessory protein UreF (ureF) [3.5.1.5]                                      | 1944 |
| SAUSA300_0876 | putative membrane protein                                                           | 1945 |
| SAUSA300_2468 | acetyltransferase, GNAT family [2.3.1.-]                                            | 1946 |
| SAUSA300_2045 | HD domain protein                                                                   | 1947 |
| SAUSA300_1688 | phenylalanyl-tRNA synthetase (beta subunit)                                         | 1948 |
| pUSA03_0009   | putative regulator of transfer genes ArtA                                           | 1949 |
| SAUSA300_2631 | putative N-acetyltransferase                                                        | 1950 |
| SAUSA300_0172 | conserved hypothetical protein                                                      | 1951 |
| SAUSA300_1558 | 5-methylthioadenosine/S-adenosylhomocysteine nucleosidase (mtnN) [3.2.2.16 3.2.2.9] | 1952 |
| SAUSA300_1069 | conserved hypothetical protein                                                      | 1953 |
| SAUSA300_0446 | glutamate synthase, small subunit (gltD) [1.4.1.13]                                 | 1954 |
| SAUSA300_1993 | kinase, pfkB family                                                                 | 1955 |
| SAUSA300_2291 | sodium/glutamate symporter (gltS)                                                   | 1956 |
| SAUSA300_2279 | LysR family regulatory protein                                                      | 1957 |
| SAUSA300_1070 | acetyltransferase, GNAT family                                                      | 1958 |
| SAUSA300_0637 | dihydroxyacetone kinase, DhaL subunit [2.7.1.-]                                     | 1959 |
| SAUSA300_2381 | conserved hypothetical protein                                                      | 1960 |
| SAUSA300_1851 | putative membrane protein                                                           | 1961 |
| SAUSA300_0026 | orfX                                                                                | 1962 |
| SAUSA300_1865 | DNA-binding response regulator (vraR)                                               | 1963 |
| SAUSA300_2368 | putative membrane protein                                                           | 1964 |
| SAUSA300_2437 | staphylococcal accessory regulator T (sarT)                                         | 1965 |
| SAUSA300_1956 | conserved hypothetical phage protein                                                | 1966 |
| SAUSA300_0507 | transcriptional regulator CtsR (ctsR)                                               | 1967 |
| SAUSA300_0753 | conserved hypothetical protein                                                      | 1968 |

|               |                                                                     |      |
|---------------|---------------------------------------------------------------------|------|
| SAUSA300_0854 | Na(+)/H(+) antiporter subunit B (mnhB)                              | 1969 |
| SAUSA300_2216 | transcriptional regulator, MarR family                              | 1970 |
| SAUSA300_0233 | conserved hypothetical protein                                      | 1971 |
| SAUSA300_1634 | dephospho-CoA kinase (coaE) [2.7.1.24]                              | 1972 |
| SAUSA300_0543 | putative deaminase                                                  | 1973 |
| SAUSA300_0430 | conserved hypothetical protein                                      | 1974 |
| SAUSA300_0833 | conserved hypothetical protein                                      | 1975 |
| SAUSA300_1719 | arsenate reductase (arsC)                                           | 1976 |
| SAUSA300_0847 | conserved hypothetical protein                                      | 1977 |
| SAUSA300_1427 | phiSLT ORF86-like protein                                           | 1978 |
| SAUSA300_2243 | urease accessory protein UreG (ureG)                                | 1979 |
| SAUSA300_0074 | oligopeptide permease, channel-forming protein (opp-3B)             | 1980 |
| SAUSA300_0121 | putative drug transporter                                           | 1981 |
| SAUSA300_2073 | thymidine kinase (tdk) [2.7.1.21]                                   | 1982 |
| SAUSA300_1019 | conserved hypothetical protein                                      | 1983 |
| SAUSA300_1872 | conserved hypothetical protein                                      | 1984 |
| SAUSA300_1437 | phiSLT ORF204-like protein                                          | 1985 |
| SAUSA300_2186 | 50S ribosomal protein L30 (rpmD)                                    | 1986 |
| SAUSA300_0643 | acetyltransferase, GNAT family                                      | 1987 |
| SAUSA300_2137 | conserved hypothetical protein                                      | 1988 |
| SAUSA300_1582 | conserved hypothetical protein                                      | 1989 |
| SAUSA300_2155 | galactose-6-phosphate isomerase (lacA) [5.3.1.26]                   | 1990 |
| SAUSA300_1968 | putative phage transcriptional regulator                            | 1991 |
| SAUSA300_2327 | conserved hypothetical protein                                      | 1992 |
| SAUSA300_1859 | conserved hypothetical protein                                      | 1993 |
| SAUSA300_2188 | 50S ribosomal protein L18 (rplR)                                    | 1994 |
| pUSA03_0019   | transfer protein complex TraJ (traJ)                                | 1995 |
| SAUSA300_1348 | polyA polymerase [2.7.7.19]                                         | 1996 |
| SAUSA300_0129 | Acetoin(diacetyl) reductase [1.1.1.5]                               | 1997 |
| SAUSA300_1745 | conserved hypothetical protein                                      | 1998 |
| SAUSA300_1939 | phi77 ORF015-like protein, putative protease                        | 1999 |
| SAUSA300_0386 | xanthine phosphoribosyltransferase (xpt) [2.4.2.-]                  | 2000 |
| SAUSA300_0261 | conserved hypothetical protein                                      | 2001 |
| SAUSA300_1936 | conserved hypothetical phage protein                                | 2002 |
| SAUSA300_2197 | 50S ribosomal protein L16 (rplP)                                    | 2003 |
| SAUSA300_0083 | putative membrane protein                                           | 2004 |
| SAUSA300_2140 | conserved hypothetical protein                                      | 2005 |
| SAUSA300_0246 | putative alcohol dehydrogenase oxidoreductase, short-chain          | 2006 |
| SAUSA300_2422 | dehydrogenase/reductase family                                      | 2007 |
| SAUSA300_1537 | conserved hypothetical protein                                      | 2008 |
| SAUSA300_2592 | conserved hypothetical protein                                      | 2009 |
| SAUSA300_0195 | RpiR family transcriptional regulator                               | 2010 |
| SAUSA300_0613 | putative Na <sup>+</sup> /H <sup>+</sup> antiporter, MnhD component | 2011 |
| SAUSA300_2290 | putative 3-methyladenine DNA glycosylase                            | 2012 |
| SAUSA300_0289 | conserved hypothetical protein                                      | 2013 |
| pUSA03_0025   | conserved hypothetical protein                                      | 2014 |
| SAUSA300_0474 | putative endoribonuclease L-PSP                                     | 2015 |
| SAUSA300_2037 | ATP-dependent RNA helicase                                          | 2016 |
| SAUSA300_1455 | transcriptional regulator, AraC family                              | 2017 |
| SAUSA300_0472 | 4-diphosphocytidyl-2C-methyl-D-erythritol kinase (ispE) [2.7.1.148] | 2018 |
| SAUSA300_1435 | phiSLT ORF153-like protein                                          | 2019 |
| SAUSA300_1732 | putative transposase                                                | 2020 |
| SAUSA300_1901 | aldehyde dehydrogenase (aldA2) [1.2.1.3]                            | 2021 |
| SAUSA300_1589 | D-tyrosyl-tRNA (Tyr) deacylase (dtd) [3.1.-.-]                      | 2022 |
| SAUSA300_1871 | conserved hypothetical protein                                      | 2023 |
| SAUSA300_2233 | BioY family protein                                                 | 2024 |
| SAUSA300_1971 | phi77 ORF017-like protein                                           | 2025 |
| SAUSA300_1790 | foldase protein PrsA precursor (prsA) [5.2.1.8]                     | 2026 |

|               |                                                                         |      |
|---------------|-------------------------------------------------------------------------|------|
| SAUSA300_1724 | abortive infection protein family                                       | 2027 |
| SAUSA300_1081 | conserved hypothetical protein                                          | 2028 |
| SAUSA300_2620 | conserved hypothetical protein                                          | 2029 |
| SAUSA300_2613 | conserved hypothetical protein                                          | 2030 |
| SAUSA300_2225 | molybdenum cofactor biosynthesis protein C (moaC)                       | 2031 |
| SAUSA300_1033 | iron/heme permease                                                      | 2032 |
| SAUSA300_1629 | threonyl-tRNA synthetase (thrS) [6.1.1.3]                               | 2033 |
| SAUSA300_2210 | probable glucose uptake protein (glcU)                                  | 2034 |
| SAUSA300_2206 | conserved hypothetical protein                                          | 2035 |
| SAUSA300_1733 | conserved hypothetical protein                                          | 2036 |
| SAUSA300_0569 | conserved hypothetical protein                                          | 2037 |
| SAUSA300_0444 | LysR family regulatory protein (gltC)                                   | 2038 |
| SAUSA300_0904 | protozoan/cyanobacterial globin family protein                          | 2039 |
| SAUSA300_1424 | conserved hypothetical phage protein                                    | 2040 |
| SAUSA300_1981 | phage terminase family protein                                          | 2041 |
| SAUSA300_0998 | conserved hypothetical protein                                          | 2042 |
| SAUSA300_1462 | conserved hypothetical protein                                          | 2043 |
| SAUSA300_0154 | capsular polysaccharide biosynthesis protein Cap5C (cap5C) [3.1.3.48]   | 2044 |
| SAUSA300_2461 | glyoxalase family protein [1.13.11.39]                                  | 2045 |
| SAUSA300_0343 | acetyltransferase, GNAT family                                          | 2046 |
| SAUSA300_1242 | exonuclease SbcD (sbcD) [3.1.-.-]                                       | 2047 |
| SAUSA300_0735 | competence protein F                                                    | 2048 |
| SAUSA300_2269 | conserved hypothetical protein                                          | 2049 |
| SAUSA300_1501 | putative competence protein ComG                                        | 2050 |
| SAUSA300_2636 | integrase/recombinase                                                   | 2051 |
| SAUSA300_2002 | glycoprotein endopeptidase (3R)-hydroxymyristoyl-[acyl carrier protein] | 2052 |
| SAUSA300_2054 | dehydratase (fabZ) [4.2.1.-]                                            | 2053 |
| SAUSA300_2088 | S-ribosylhomocysteinase (luxS) [3.13.1.-]                               | 2054 |
| SAUSA300_2177 | 50S ribosomal protein L17 (rplQ)                                        | 2055 |
| SAUSA300_1273 | oligopeptide permease, ATP-binding protein (opp-2F)                     | 2056 |
| SAUSA300_1281 | phosphate ABC transporter, permease protein PstA (pstA)                 | 2057 |
| SAUSA300_0330 | putative transport protein SgaT                                         | 2058 |
| SAUSA300_0390 | conserved hypothetical protein                                          | 2059 |
| SAUSA300_0745 | putative acetyltransferase                                              | 2060 |
| SAUSA300_0991 | peptide deformylase (def) [3.5.1.88]                                    | 2061 |
| SAUSA300_2521 | conserved hypothetical protein                                          | 2062 |
| SAUSA300_0528 | DNA-directed RNA polymerase, beta subunit (rpoC) [2.7.7.6]              | 2063 |
| SAUSA300_0788 | nitroreductase family protein                                           | 2064 |
| SAUSA300_2618 | conserved hypothetical protein                                          | 2065 |
| SAUSA300_0714 | Integral membrane protein                                               | 2066 |
| SAUSA300_2059 | ATP synthase F1, gamma subunit (atpG) [3.6.3.14]                        | 2067 |
| SAUSA300_1237 | LexA repressor (lexA) [3.4.21.88]                                       | 2068 |
| SAUSA300_1397 | phiSLT ORF213-like protein, major tail protein                          | 2069 |
| SAUSA300_1760 | lantibiotic epidermin immunity protein F (epiG)                         | 2070 |
| SAUSA300_2346 | nitrite reductase [NAD(P)H], large subunit (nirB) [1.7.1.4]             | 2071 |
| SAUSA300_1989 | accessory gene regulator protein B (agrB)                               | 2072 |
| SAUSA300_0095 | transcriptional regulator, LysR family domain protein                   | 2073 |
| SAUSA300_1368 | L-asparaginase (ansA) [3.5.1.1]                                         | 2074 |
| SAUSA300_0391 | conserved hypothetical protein                                          | 2075 |
| SAUSA300_1500 | putative competence protein ComYC                                       | 2076 |
| SAUSA300_2570 | arginine deiminase (arcA) [3.5.3.6]                                     | 2077 |
| SAUSA300_1000 | spermidine/putrescine ABC transporter, permease protein (potB)          | 2078 |

|                  |                                                                                       |      |
|------------------|---------------------------------------------------------------------------------------|------|
| SAUSA300_0647    | ABC transporter, ATP-binding protein<br>branched-chain amino acid transport system II | 2079 |
| SAUSA300_1300    | carrier protein (brnQ)                                                                | 2080 |
| SAUSA300_1934    | phi77 ORF020-like protein, phage major tail protein                                   | 2081 |
| SAUSA300_1267    | tryptophan synthase, beta subunit (trpB) [4.2.1.20]                                   | 2082 |
| SAUSA300_1241    | conserved hypothetical protein                                                        | 2083 |
| SAUSA300_0526    | Methyltransferase small domain                                                        | 2084 |
| SAUSA300_1722    | conserved hypothetical protein                                                        | 2085 |
| SAUSA300_1049    | glutamate racemase (murl) [5.1.1.3]                                                   | 2086 |
| SAUSA300_1868    | conserved hypothetical protein                                                        | 2087 |
| SAUSA300_2479    | Holin-like protein cidA (cidA)                                                        | 2088 |
| SAUSA300_1566    | conserved hypothetical protein                                                        | 2089 |
| SAUSA300_2448    | putative membrane protein<br>4-phosphopantetheinyl transferase superfamily<br>protein | 2090 |
| SAUSA300_0182    | type I restriction-modification enzyme, S subunit<br>(hsdS)                           | 2091 |
| SAUSA300_1751    | capsular polysaccharide biosynthesis protein Cap5H<br>(cap5H)                         | 2092 |
| SAUSA300_0159    | mannose-6-phosphate isomerase, class I (manA)<br>[5.3.1.8]                            | 2093 |
| SAUSA300_2577    | phosphonate ABC transporter, ATP-binding protein<br>(phnC)                            | 2094 |
| SAUSA300_0144    | alanine dehydrogenase (ald) [1.4.1.1]                                                 | 2095 |
| SAUSA300_1331    | antigen, 67 kDa                                                                       | 2096 |
| SAUSA300_0108    | conserved hypothetical protein                                                        | 2097 |
| SAUSA300_1795    | putative Bacterial sugar transferase                                                  | 2098 |
| SAUSA300_0131    | polysaccharide biosynthesis protein                                                   | 2099 |
| SAUSA300_0482    | conserved hypothetical protein                                                        | 2100 |
| SAUSA300_0178    | ABC transporter, permease protein                                                     | 2101 |
| SAUSA300_1515    | conserved hypothetical protein                                                        | 2102 |
| SAUSA300_1744    | ABC transporter, permease protein                                                     | 2103 |
| SAUSA300_0176    | glucosamine--fructose-6-phosphate<br>aminotransferase (isomerizing) (glmS) [2.6.1.16] | 2104 |
| SAUSA300_2104    | putative lipoprotein                                                                  | 2105 |
| SAUSA300_2614    | putative glutamyl aminopeptidase                                                      | 2106 |
| SAUSA300_1261    | S1 RNA binding domain protein                                                         | 2107 |
| SAUSA300_2021    | 16S rRNA processing protein RimM (rimM)                                               | 2108 |
| SAUSA300_1132    | conserved hypothetical protein                                                        | 2109 |
| SAUSA300_0127    | conserved hypothetical phage protein                                                  | 2110 |
| SAUSA300_1964    | putative lysophospholipase                                                            | 2111 |
| SAUSA300_0070    | conserved hypothetical protein                                                        | 2112 |
| SAUSA300_1898    | M23/M37 peptidase domain protein                                                      | 2113 |
| SAUSA300_2162    | putative competence protein ComGA                                                     | 2114 |
| SAUSA300_1504    | conserved hypothetical protein                                                        | 2115 |
| SAUSA300_1750-s3 | iron compound ABC transporter, permease                                               | 2116 |
| SAUSA300_0718    | galactose-6-phosphate isomerase (lacB) [5.3.1.26]                                     | 2117 |
| SAUSA300_2154    | putative membrane protein                                                             | 2118 |
| SAUSA300_2405    | tetracycline resistance protein                                                       | 2119 |
| pUSA02_0001      | conserved hypothetical protein                                                        | 2120 |
| SAUSA300_0266    | conserved hypothetical protein                                                        | 2121 |
| SAUSA300_0427    | conserved hypothetical protein                                                        | 2122 |
| SAUSA300_0583    | conserved hypothetical protein                                                        | 2123 |
| SAUSA300_1278    | oligoendopeptidase F (pepF) [3.4.24.-]                                                | 2124 |
| SAUSA300_0559    | putative substrate--CoA ligase                                                        | 2125 |
| SAUSA300_2313    | L-lactate permease                                                                    | 2126 |
| SAUSA300_2318    | acetyltransferase, GNAT family                                                        | 2127 |
| SAUSA300_2456    | putative membrane protein                                                             | 2128 |
| SAUSA300_1313    | carboxyl-terminal protease (ctpA) [3.4.21.-]                                          | 2129 |
| SAUSA300_1353    | conserved hypothetical protein                                                        | 2130 |
| SAUSA300_0312    | indigoidine synthase family protein                                                   | 2131 |
| SAUSA300_0898    | Regulatory protein spx (spxA)                                                         | 2132 |

|                  |                                                                  |      |
|------------------|------------------------------------------------------------------|------|
| SAUSA300_1524    | CBS domain pair protein                                          | 2133 |
| pUSA03_0036      | conserved hypothetical protein                                   | 2134 |
| SAUSA300_2640    | putative transcriptional regulator                               | 2135 |
|                  | ATP-dependent Clp protease, ATP-binding subunit                  |      |
| SAUSA300_1621    | ClpX (clpX)                                                      | 2136 |
|                  | phosphoribosylaminoimidazole-succinocarboxamide                  |      |
| SAUSA300_0968    | synthase (purC) [6.3.2.6]                                        | 2137 |
| SAUSA300_2320    | conserved hypothetical protein                                   | 2138 |
| SAUSA300_0008    | histidine ammonia-lyase (hutH) [4.3.1.3]                         | 2139 |
| SAUSA300_2138    | conserved hypothetical protein                                   | 2140 |
|                  | glycine dehydrogenase, subunit 1 (glycine cleavage               |      |
| SAUSA300_1497    | system P protein) [1.4.4.2]                                      | 2141 |
|                  | N-acetyl-gamma-glutamyl-phosphate reductase                      |      |
| SAUSA300_0186    | (argC) [1.2.1.38]                                                | 2142 |
| SAUSA300_0046    | conserved hypothetical protein                                   | 2143 |
| SAUSA300_0181    | non-ribosomal peptide synthetase                                 | 2144 |
| SAUSA300_0094    | conserved hypothetical protein                                   | 2145 |
| SAUSA300_1530    | conserved hypothetical protein                                   | 2146 |
| SAUSA300_1954    | phiPVL ORF050-like protein                                       | 2147 |
| SAUSA300_2169    | conserved hypothetical protein                                   | 2148 |
| SAUSA300_1991    | accessory gene regulator protein C (agrC)                        | 2149 |
| SAUSA300_1326    | putative cell wall enzyme EbsB                                   | 2150 |
| SAUSA300_1022    | conserved hypothetical protein                                   | 2151 |
| SAUSA300_0918    | conserved hypothetical protein                                   | 2152 |
| SAUSA300_0701    | conserved hypothetical protein TIGR00370                         | 2153 |
| SAUSA300_2553    | putative siroheme synthase                                       | 2154 |
| SAUSA300_1959    | phiPVL ORF044-like protein                                       | 2155 |
|                  | phi77 ORF001-like protein, phage tail tape measure               |      |
| SAUSA300_1930-s3 | protein                                                          | 2156 |
| SAUSA300_2629    | conserved hypothetical protein                                   | 2157 |
| SAUSA300_1262    | anthranilate synthase component I (trpE) [4.1.3.27]              | 2158 |
|                  | methylated DNA-protein cysteine methyltransferase                |      |
| SAUSA300_2485    | [2.1.1.63]                                                       | 2159 |
| SAUSA300_1232    | catalase [1.11.1.6]                                              | 2160 |
|                  | GTP-sensing transcriptional pleiotropic repressor                |      |
| SAUSA300_1148    | CodY (codY)                                                      | 2161 |
| pUSA03_0005      | transposase                                                      | 2162 |
| SAUSA300_2525    | conserved hypothetical protein                                   | 2163 |
| SAUSA300_1984    | putative membrane protein                                        | 2164 |
| SAUSA300_1374    | conserved hypothetical protein                                   | 2165 |
| SAUSA300_2090    | deoxyribose-phosphate aldolase (deoC) [4.1.2.4]                  | 2166 |
| SAUSA300_2009    | ketol-acid reductoisomerase (ilvC) [1.1.1.86]                    | 2167 |
| SAUSA300_0078    | ATPase copper transport (copA) [3.6.3.4]                         | 2168 |
| SAUSA300_2179    | 30S ribosomal protein S11 (rpsK)                                 | 2169 |
| SAUSA300_2328    | conserved hypothetical protein                                   | 2170 |
| SAUSA300_2509    | transcriptional regulator, TetR family                           | 2171 |
|                  | molybdenum ABC transporter, ATP-binding protein                  |      |
| SAUSA300_2228    | ModC (modC) [3.6.3.29]                                           | 2172 |
| SAUSA300_1907    | conserved hypothetical protein                                   | 2173 |
| SAUSA300_0902    | oligoendopeptidase F (pepF) [3.4.24.-]                           | 2174 |
| SAUSA300_2033    | K <sup>+</sup> -transporting ATPase, B subunit (kdpB) [3.6.3.12] | 2175 |
| SAUSA300_2373    | dethiobiotin synthase (bioD) [6.3.3.3]                           | 2176 |
| SAUSA300_2394    | conserved hypothetical protein                                   | 2177 |
| SAUSA300_0103    | staphylococcus tandem lipoprotein                                | 2178 |
| SAUSA300_0435    | ABC transporter, ATP-binding protein                             | 2179 |
| SAUSA300_0436    | ABC transporter, permease protein                                | 2180 |
| SAUSA300_1660    | putative membrane protein                                        | 2181 |
| SAUSA300_1999    | redox-sensing transcriptional repressor rex (rex)                | 2182 |
| SAUSA300_0349    | conserved hypothetical protein                                   | 2183 |
| SAUSA300_1567    | transcription elongation factor GreA (greA)                      | 2184 |
| SAUSA300_0817    | putative membrane protein                                        | 2185 |

|                  |                                                                                     |      |
|------------------|-------------------------------------------------------------------------------------|------|
| SAUSA300_0016    | replicative DNA helicase (dnaB) [3.6.1.-]                                           | 2186 |
| SAUSA300_0052    | hypothetical protein                                                                | 2187 |
| SAUSA300_1608    | DNA repair protein RadC                                                             | 2188 |
|                  | cysteine synthase/cystathionine beta-synthase (cysM) [4.2.99.8]                     | 2189 |
| SAUSA300_0433    |                                                                                     | 2189 |
| SAUSA300_1568    | uridine kinase (udk) [2.7.1.48]                                                     | 2190 |
| SAUSA300_0445-s3 | glutamate synthase, large subunit (gltB) [1.4.1.13]                                 | 2191 |
| SAUSA300_0822    | FeS assembly protein SufB (sufB)                                                    | 2192 |
| SAUSA300_1513    | superoxide dismutase (Mn/Fe family) [1.15.1.1]                                      | 2193 |
| SAUSA300_1565    | putative urea amidolyase                                                            | 2194 |
| SAUSA300_0250    | alcohol dehydrogenase, zinc-containing [1.1.1.1]                                    | 2195 |
| SAUSA300_1224    | conserved hypothetical protein                                                      | 2196 |
| SAUSA300_0582    | conserved hypothetical protein                                                      | 2197 |
| SAUSA300_1555    | shikimate 5-dehydrogenase (aroE) [1.1.1.25]                                         | 2198 |
| SAUSA300_0856    | conserved hypothetical protein                                                      | 2199 |
| SAUSA300_2563    | putative transcriptional regulator                                                  | 2200 |
| SAUSA300_0605    | staphylococcal accessory regulator A (sarA)                                         | 2201 |
| SAUSA300_2026    | PemK family protein                                                                 | 2202 |
| SAUSA300_1655    | alanine dehydrogenase (ald) [1.4.1.1]                                               | 2203 |
| SAUSA300_0907    | GTP pyrophosphokinase [2.7.6.5]                                                     | 2204 |
| SAUSA300_1308    | DNA-binding response regulator (arlR)                                               | 2205 |
|                  | imidazole glycerol phosphate synthase subunit hisF (hisF)                           | 2206 |
| SAUSA300_2606    |                                                                                     | 2206 |
| SAUSA300_2011    | 3-isopropylmalate dehydrogenase (leuB) [1.1.1.85]                                   | 2207 |
|                  | transcription termination/antitermination factor NusG (nusG)                        | 2208 |
| SAUSA300_0521    |                                                                                     | 2208 |
| SAUSA300_0824    | conserved hypothetical protein                                                      | 2209 |
| SAUSA300_1799    | putative sensor histidine kinase                                                    | 2210 |
|                  | iron compound ABC transporter, permease protein SirC (sirC)                         | 2211 |
| SAUSA300_0115    |                                                                                     | 2211 |
| SAUSA300_0705    | ATP-dependent DNA helicase RecQ (recQ) [3.6.1.-]                                    | 2212 |
| SAUSA300_0102    | staphylococcus tandem lipoprotein                                                   | 2213 |
| SAUSA300_2129    | putative hemolysin III                                                              | 2214 |
| SAUSA300_1645    | 6-phosphofructokinase (pfkA) [2.7.1.11]                                             | 2215 |
| SAUSA300_2022    | RNA polymerase sigma-37 factor (rpoF)                                               | 2216 |
| SAUSA300_2168    | conserved hypothetical protein                                                      | 2217 |
| SAUSA300_2552    | citrate transporter, permease protein                                               | 2218 |
| SAUSA300_1675    | tyrosyl-tRNA synthetase (tyrS) [6.1.1.1]                                            | 2219 |
| SAUSA300_2350    | conserved hypothetical protein                                                      | 2220 |
| SAUSA300_0732    | conserved hypothetical protein                                                      | 2221 |
| SAUSA300_0797    | ABC transporter permease protein                                                    | 2222 |
| SAUSA300_2630    | high-affinity nickel-transporter (nixA)                                             | 2223 |
| SAUSA300_2237    | putative urea transporter                                                           | 2224 |
| SAUSA300_0750    | conserved hypothetical protein                                                      | 2225 |
|                  | intercellular adhesion operon transcription regulator, TetR family (tetR)           | 2226 |
| SAUSA300_2599    |                                                                                     | 2226 |
| SAUSA300_0558    | putative proline/betaine transporter                                                | 2227 |
|                  | phosphate ABC transporter, permease protein PstC (pstC)                             | 2228 |
| SAUSA300_1282    |                                                                                     | 2228 |
|                  | CDP-diacylglycerol--glycerol-3-phosphate 3-phosphatidyltransferase (pgsA) [2.7.8.5] | 2229 |
| SAUSA300_1176    |                                                                                     | 2229 |
| SAUSA300_2438    | staphylococcal accessory regulator U (sarU)                                         | 2230 |
| SAUSA300_0791    | glycine cleavage system H protein (gcvH)                                            | 2231 |
| SAUSA300_0674    | oxidoreductase, aldo/keto reductase family [1.-.-.-]                                | 2232 |
| SAUSA300_1207    | conserved hypothetical protein                                                      | 2233 |
| SAUSA300_2602    | intercellular adhesion protein C (icaC)                                             | 2234 |
| SAUSA300_1804    | conserved hypothetical protein                                                      | 2235 |
| SAUSA300_2558    | sensor histidine kinase [2.7.3.-]                                                   | 2236 |
| SAUSA300_0531    | 30S ribosomal protein S7                                                            | 2237 |
| SAUSA300_2616    | cobalt transport family protein                                                     | 2238 |
| SAUSA300_0848    | conserved hypothetical protein                                                      | 2239 |

|               |                                                                                                                                 |      |
|---------------|---------------------------------------------------------------------------------------------------------------------------------|------|
| SAUSA300_0584 | conserved hypothetical protein                                                                                                  | 2240 |
| SAUSA300_0622 | putative membrane protein                                                                                                       | 2241 |
| SAUSA300_0269 | Cchologylglycine hydrolase family protein [3.5.1.24]<br>geranylgeranylgeranyl phosphate synthase family<br>protein, PcrB (pcrB) | 2242 |
| SAUSA300_1887 | ribonuclease Z [3.1.26.11]                                                                                                      | 2243 |
| SAUSA300_1453 | translation elongation factor P (efp)                                                                                           | 2244 |
| SAUSA300_1490 | conserved hypothetical protein                                                                                                  | 2245 |
| SAUSA300_0362 | imidazole glycerol phosphate synthase subunit hisH<br>(hisH) [2.4.2.-]                                                          | 2246 |
| SAUSA300_2608 | glutamine synthetase, type I (glnA) [6.3.1.2]                                                                                   | 2247 |
| SAUSA300_1201 | putative membrane protein                                                                                                       | 2248 |
| SAUSA300_2262 | PTS system, lactose-specific IIBC component (lacE)<br>[2.7.1.69]                                                                | 2249 |
| SAUSA300_2150 | ferrochelatase (hemH) [4.99.1.1]                                                                                                | 2250 |
| SAUSA300_1782 | O-succinylbenzoic acid synthetase (menC) [4.2.1.-]                                                                              | 2251 |
| SAUSA300_1735 | putative transposase, degenerate                                                                                                | 2252 |
| SAUSA300_1727 | glycosyl transferase, group 4 family protein [2.7.8.-]                                                                          | 2253 |
| SAUSA300_0731 | 5 nucleotidase family protein [3.1.4.16]                                                                                        | 2254 |
| SAUSA300_0147 | 50S ribosomal protein L6 (rplF)                                                                                                 | 2255 |
| SAUSA300_2189 | acetate kinase (ackA) [2.7.2.1]                                                                                                 | 2256 |
| SAUSA300_1657 | potassium uptake protein (trkA)                                                                                                 | 2257 |
| SAUSA300_0988 | proline dipeptidase [3.4.13.9]                                                                                                  | 2258 |
| SAUSA300_1491 | uracil-DNA glycosylase (ung) [3.2.2.-]                                                                                          | 2259 |
| SAUSA300_0563 | RNA methyltransferase, TrmH family                                                                                              | 2260 |
| SAUSA300_1036 | hydrolase, alpha/beta hydrolase fold family                                                                                     | 2261 |
| SAUSA300_1194 | nicotinate (nicotinamide) nucleotide<br>adenylyltransferase (nadD) [2.7.7.18]                                                   | 2262 |
| SAUSA300_1553 | TPR domain protein                                                                                                              | 2263 |
| SAUSA300_1577 | conserved hypothetical protein                                                                                                  | 2264 |
| SAUSA300_2543 | staphylococcal accessory regulator                                                                                              | 2265 |
| SAUSA300_0114 | aminomethyltransferase (glycine cleavage system T<br>protein) (gcvT) [2.1.2.10]                                                 | 2266 |
| SAUSA300_1498 | methionine aminopeptidase (map) [3.4.11.18]                                                                                     | 2267 |
| SAUSA300_1869 | N-(5phosphoribosyl)anthranilate isomerase (trpF)<br>[5.3.1.24]                                                                  | 2268 |
| SAUSA300_1266 | non-canonical purine NTP pyrophosphatase,<br>rdgB/HAM1 family                                                                   | 2269 |
| SAUSA300_1050 | aspartate carbamoyltransferase (pyrB) [2.1.3.2]                                                                                 | 2270 |
| SAUSA300_1093 | amino acid permease                                                                                                             | 2271 |
| SAUSA300_1329 | homoserine kinase (thrB) [2.7.1.39]                                                                                             | 2272 |
| SAUSA300_1228 | conserved hypothetical protein                                                                                                  | 2273 |
| SAUSA300_1083 | conserved hypothetical protein                                                                                                  | 2274 |
| SAUSA300_2414 | peptidase, rhomboid family                                                                                                      | 2275 |
| SAUSA300_1509 | peptidase, U32 family [3.4.-.-]                                                                                                 | 2276 |
| SAUSA300_1570 | glycerate kinase family protein [2.7.1.31]                                                                                      | 2277 |
| SAUSA300_0726 | similar to regulatory protein                                                                                                   | 2278 |
| SAUSA300_2507 | ABC transporter, permease protein                                                                                               | 2279 |
| SAUSA300_1218 | alanine racemase (alr) [5.1.1.1]                                                                                                | 2280 |
| SAUSA300_2027 | transposase                                                                                                                     | 2281 |
| pUSA03_0024   | amidophosphoribosyltransferase (purF) [2.4.2.14]                                                                                | 2282 |
| SAUSA300_0972 | conserved hypothetical protein                                                                                                  | 2283 |
| SAUSA300_1336 | drug resistance transporter, EmrB/QacA subfamily                                                                                | 2284 |
| SAUSA300_2126 | polysaccharide extrusion protein                                                                                                | 2285 |
| SAUSA300_0134 | putative membrane protein                                                                                                       | 2286 |
| SAUSA300_2472 | conserved hypothetical protein                                                                                                  | 2287 |
| SAUSA300_2310 | putative GTP-binding protein                                                                                                    | 2288 |
| SAUSA300_1198 | 2-C-methyl-D-erythritol 4-phosphate<br>cytidyltransferase [2.7.7.60]                                                            | 2289 |
| SAUSA300_0245 | conserved hypothetical protein                                                                                                  | 2290 |
| SAUSA300_1338 | conserved hypothetical protein                                                                                                  | 2291 |
| SAUSA300_2314 | conserved hypothetical protein                                                                                                  | 2292 |



|               |                                                                                           |      |
|---------------|-------------------------------------------------------------------------------------------|------|
| SAUSA300_2628 | RarD protein (rarD)                                                                       | 2293 |
| SAUSA300_2175 | ABC transporter, ATP-binding protein                                                      | 2294 |
| SAUSA300_2399 | ABC transporter, ATP-binding protein                                                      | 2295 |
| SAUSA300_1785 | putative ABC transporter protein EcsB                                                     | 2296 |
| SAUSA300_1263 | anthranilate synthase, glutamine amidotransferase, component II (trpG) [4.1.3.27]         | 2297 |
| SAUSA300_1015 | cytochrome oxidase assembly protein (ctaA)                                                | 2298 |
| SAUSA300_0310 | perfringolysin O regulator protein (pfor)                                                 | 2299 |
| SAUSA300_2097 | conserved hypothetical protein                                                            | 2300 |
| SAUSA300_2610 | histidinol-phosphate aminotransferase hisC (hisC)                                         | 2301 |
| SAUSA300_1146 | ATP-dependent protease hslV (hslV) [3.4.99.-]                                             | 2302 |
| SAUSA300_1121 | conserved hypothetical protein                                                            | 2303 |
| SAUSA300_1902 | conserved hypothetical protein                                                            | 2304 |
| SAUSA300_0354 | low temperature requirement protein LtrA (ltrA)                                           | 2305 |
| SAUSA300_0357 | 5-methyltetrahydropteroyltriglutamate--homocysteine S-methyltransferase (metE) [2.1.1.14] | 2306 |
| SAUSA300_1173 | putative acetoacetyl-CoA reductase                                                        | 2307 |
| SAUSA300_1151 | uridylyate kinase (pyrH) [2.7.4.-]                                                        | 2308 |
| SAUSA300_2347 | nitrite reductase transcriptional regulator NirR (nirR)                                   | 2309 |
| SAUSA300_1214 | conserved hypothetical protein                                                            | 2310 |
| SAUSA300_0709 | 5(3)-deoxyribonucleotidase [3.1.3.-]                                                      | 2311 |
| SAUSA300_2426 | conserved hypothetical protein                                                            | 2312 |
| SAUSA300_0265 | putative ribose operon repressor                                                          | 2313 |
| SAUSA300_1123 | malonyl CoA-acyl carrier protein transacylase (fabD) [2.3.1.39]                           | 2314 |
| SAUSA300_0138 | purine nucleoside phosphorylase (deoD) [2.4.2.1]                                          | 2315 |
| SAUSA300_2303 | transcriptional regulator TcaR (tcaR)                                                     | 2316 |
| SAUSA300_2549 | choline/carnitine/betaine transporter, BCCT family (bccT)                                 | 2317 |
| SAUSA300_0153 | capsular polysaccharide biosynthesis protein Cap5B (cap5B) [2.7.1.112]                    | 2318 |
| SAUSA300_0818 | FeS assembly ATPase SufC (sufC)                                                           | 2319 |
| SAUSA300_2551 | anaerobic ribonucleotide reductase, large subunit (nrdD) [1.17.4.2]                       | 2320 |
| SAUSA300_2585 | accessory secretory protein Asp3                                                          | 2321 |
| SAUSA300_0222 | putative membrane protein                                                                 | 2322 |
| SAUSA300_0890 | oligopeptide ABC transporter, ATP-binding protein (oppF)                                  | 2323 |
| SAUSA300_2261 | conserved hypothetical protein                                                            | 2324 |
| SAUSA300_0432 | sodium dependent transporter                                                              | 2325 |
| SAUSA300_0191 | PTS system, glucose-specific IIBC component domain protein (ptsG) [2.7.1.69]              | 2326 |
| SAUSA300_1561 | putative membrane protein                                                                 | 2327 |
| SAUSA300_0072 | hypothetical protein                                                                      | 2328 |
| SAUSA300_0895 | oligopeptide ABC transporter, permease protein (oppB)                                     | 2329 |
| SAUSA300_2284 | conserved hypothetical protein                                                            | 2330 |
| SAUSA300_1142 | DNA protecting protein DprA (dprA)                                                        | 2331 |
| SAUSA300_0217 | DNA-binding response regulator, AraC family                                               | 2332 |
| SAUSA300_1309 | transposase, IS200 family                                                                 | 2333 |
| SAUSA300_0314 | sodium:solute symporter family protein                                                    | 2334 |
| SAUSA300_0976 | phosphoribosylamine--glycine ligase (purD) [6.3.4.13]                                     | 2335 |
| SAUSA300_0069 | IS431 transposase, authentic frameshift                                                   | 2336 |
| SAUSA300_0384 | conserved hypothetical protein                                                            | 2337 |
| SAUSA300_2306 | ABC transporter, ATP-binding protein                                                      | 2338 |
| SAUSA300_0517 | RNA methyltransferase, TrmH family, group 3                                               | 2339 |
| SAUSA300_2190 | 30S ribosomal protein S8 (rpsH)                                                           | 2340 |
| SAUSA300_2128 | putative drug transporter                                                                 | 2341 |
| SAUSA300_2064 | ATP synthase F0, A subunit (atpB) [3.6.3.14]                                              | 2342 |

|                  |                                                                                                |      |
|------------------|------------------------------------------------------------------------------------------------|------|
| SAUSA300_1328    | putative drug transporter                                                                      | 2343 |
| SAUSA300_1687    | FtsK/SpoIIIE family protein                                                                    | 2344 |
| SAUSA300_2482    | conserved hypothetical protein                                                                 | 2345 |
| SAUSA300_0107    | Na/Pi cotransporter family protein                                                             | 2346 |
| SAUSA300_0268    | putative drug transporter                                                                      | 2347 |
| SAUSA300_2588    | preprotein translocase, SecY protein                                                           | 2348 |
| SAUSA300_2416    | similar to glucose 1-dehydrogenase [1.1.1.47]                                                  | 2349 |
| SAUSA300_0206    | flavodoxin family protein                                                                      | 2350 |
| SAUSA300_0712    | amino acid/peptide transporter (Peptide:H+ symporter)                                          | 2351 |
| SAUSA300_0609    | phage integrase family protein                                                                 | 2352 |
| SAUSA300_2490    | regulatory protein, TetR family                                                                | 2353 |
| SAUSA300_0852    | Na(+)/H(+) antiporter subunit D (mnhD)                                                         | 2354 |
| SAUSA300_0684    | fructose 1-phosphate kinase (fruB) [2.7.1.56]                                                  | 2355 |
| SAUSA300_0635    | ferrichrome transport permease protein fhuG (fhuG)                                             | 2356 |
| SAUSA300_0062    | ornithine carbamoyltransferase (arcB) [2.1.3.3]                                                | 2357 |
| SAUSA300_1226    | homoserine dehydrogenase [1.1.1.3]                                                             | 2358 |
| SAUSA300_2324    | PTS system, sucrose-specific IIBC component [2.7.1.69]                                         | 2359 |
| SAUSA300_1450    | oxidoreductase, aldo/keto reductase family                                                     | 2360 |
| SAUSA300_0341    | putative membrane protein                                                                      | 2361 |
| SAUSA300_1393-s4 | phiSLT ORF2067-like protein, phage tail tape measure protein                                   | 2362 |
| SAUSA300_1080    | cell division protein ftsZ (ftsZ)                                                              | 2363 |
| SAUSA300_0317    | conserved hypothetical protein                                                                 | 2364 |
| SAUSA300_2445    | transcriptional regulator, MerR family                                                         | 2365 |
| SAUSA300_1996    | ammonium transporter (amt)                                                                     | 2366 |
| SAUSA300_2607    | phosphoribosylformimino-5-aminoimidazole carboxamide ribotide isomerase hisA (hisA) [5.3.1.16] | 2367 |
| SAUSA300_2357    | ABC transporter, ATP-binding protein                                                           | 2368 |
| SAUSA300_1243-s2 | exonuclease SbcC (sbcC)                                                                        | 2369 |
| SAUSA300_0215    | conserved hypothetical protein                                                                 | 2370 |
| SAUSA300_0037    | cassette chromosome recombinase B (ccrB)                                                       | 2371 |
| SAUSA300_0650    | phosphate transporter family protein                                                           | 2372 |
| SAUSA300_2255    | monooxygenase family protein [1.14.13.-]                                                       | 2373 |
| SAUSA300_0271    | ABC transporter, ATP-binding protein                                                           | 2374 |
| SAUSA300_0986    | cytochrome D ubiquinol oxidase, subunit I [1.10.3.-]                                           | 2375 |
| SAUSA300_0041    | conserved hypothetical protein                                                                 | 2376 |
| SAUSA300_1850    | conserved hypothetical protein                                                                 | 2377 |
| SAUSA300_0122    | siderophore biosynthesis protein, lucA/lucC family                                             | 2378 |
| SAUSA300_2496    | D-isomer specific 2-hydroxyacid dehydrogenase family protein [1.1.1.28]                        | 2379 |
| SAUSA300_0238    | transcriptional antiterminator, BglG family                                                    | 2380 |
| SAUSA300_0118    | pyridoxal-phosphate dependent enzyme superfamily                                               | 2381 |
| SAUSA300_2385    | putative membrane protein                                                                      | 2382 |
| SAUSA300_0116    | iron compound ABC transporter, permease protein SirB (sirB)                                    | 2383 |
| SAUSA300_1085    | conserved hypothetical protein                                                                 | 2384 |
| SAUSA300_2523    | conserved hypothetical protein                                                                 | 2385 |
| SAUSA300_0506    | pyrimidine nucleoside transport protein (nupC)                                                 | 2386 |
| SAUSA300_1182    | pyruvate ferredoxin oxidoreductase, alpha subunit [1.2.7.3]                                    | 2387 |
| SAUSA300_0742    | excinuclease ABC, A subunit (uvrA)                                                             | 2388 |
| SAUSA300_1457    | maltose operon transcriptional repressor (malR)                                                | 2389 |
| SAUSA300_1620    | probable GTP-binding protein engB                                                              | 2390 |
| SAUSA300_1451    | oxidoreductase, short-chain dehydrogenase/reductase family                                     | 2391 |
| SAUSA300_2071    | modification methylase, HemK family [2.1.1.-]                                                  | 2392 |

|               |                                                                                          |      |
|---------------|------------------------------------------------------------------------------------------|------|
| SAUSA300_1809 | putative membrane protein                                                                | 2393 |
| SAUSA300_0061 | carbamate kinase (arcC) [2.7.2.2]                                                        | 2394 |
|               | phosphate starvation-induced protein, PhoH family (phoH)                                 | 2395 |
| SAUSA300_1531 | DNA-binding response regulator                                                           | 2396 |
| SAUSA300_2559 | transfer complex protein TraK (traK)                                                     | 2397 |
| pUSA03_0020   | ribosomal subunit interface protein (yfiA)                                               | 2398 |
| SAUSA300_0736 | pyruvate ferredoxin oxidoreductase, beta subunit                                         | 2399 |
| SAUSA300_1183 | phosphotransferase system, N-acetylglucosamine-specific IIBC component (nagE) [2.7.1.69] | 2400 |
| SAUSA300_1672 | ATP-dependent DNA helicase RecG (recG) [3.6.1.-]                                         | 2401 |
| SAUSA300_1120 | phosphonate ABC transporter, permease protein (phnE)                                     | 2402 |
| SAUSA300_0143 |                                                                                          |      |
| SAUSA300_2612 | ATP phosphoribosyltransferase hisG (hisG) [2.4.2.17]                                     | 2403 |
| SAUSA300_0466 | conserved hypothetical protein                                                           | 2404 |
| SAUSA300_1065 | exfoliative toxin A                                                                      | 2405 |
| SAUSA300_0557 | HAD-superfamily hydrolase, subfamily IA, variant 1                                       | 2406 |
| SAUSA300_0218 | sensor histidine kinase family protein [2.7.3.-]                                         | 2407 |
| SAUSA300_1542 | heat-inducible transcription repressor HrcA (hrcA)                                       | 2408 |
| SAUSA300_0740 | conserved hypothetical protein                                                           | 2409 |
|               | putative iron compound ABC transporter, ATP-binding protein                              | 2410 |
| SAUSA300_0720 |                                                                                          |      |
| SAUSA300_1916 | aminotransferase                                                                         | 2411 |
| SAUSA300_1716 | conserved hypothetical protein                                                           | 2412 |
| SAUSA300_1063 | carbamate kinase (arcC) [2.7.2.2]                                                        | 2413 |
| SAUSA300_2494 | copper-translocating P-type ATPase                                                       | 2414 |
| SAUSA300_0227 | acyl-CoA dehydrogenase FadD (fadD) [1.3.99.7]                                            | 2415 |
| SAUSA300_1408 | phage helicase                                                                           | 2416 |
| SAUSA300_0119 | ornithine cyclodeaminase [4.3.1.12]                                                      | 2417 |
| SAUSA300_0646 | sensor histidine kinase [2.7.3.-]                                                        | 2418 |
| SAUSA300_2454 | membrane spanning protein                                                                | 2419 |
| SAUSA300_1510 | 5-formyltetrahydrofolate cyclo-ligase subfamily                                          | 2420 |
| SAUSA300_1786 | ABC transporter, ATP-binding protein EcsA                                                | 2421 |
|               | acetyl-CoA carboxylase, carboxyl transferase, alpha subunit (accA) [6.4.1.2]             | 2422 |
| SAUSA300_1646 |                                                                                          |      |
|               | respiratory nitrate reductase, beta subunit (narH) [1.7.99.4]                            | 2423 |
| SAUSA300_2342 |                                                                                          |      |
| SAUSA300_2139 | putative transporter                                                                     | 2424 |
| SAUSA300_2281 | formimidoylglutamase (hutG) [3.5.3.8]                                                    | 2425 |
| SAUSA300_0175 | putative lipoprotein                                                                     | 2426 |
|               | S-adenosyl-methyltransferase MraW (mraW) [2.1.1.-]                                       | 2427 |
| SAUSA300_1073 |                                                                                          |      |
| SAUSA300_2277 | imidazolonepropionase (hutI) [3.5.2.7]                                                   | 2428 |
| SAUSA300_0687 | putative hemolysin                                                                       | 2429 |
| SAUSA300_2568 | arginine/ornithine antiporter (arcD)                                                     | 2430 |
|               | phosphate ABC transporter, phosphate-binding protein PstS (pstS)                         | 2431 |
| SAUSA300_1283 |                                                                                          |      |
| SAUSA300_0571 | lipoate-protein ligase A family protein                                                  | 2432 |
| SAUSA300_0291 | putative membrane protein                                                                | 2433 |
|               | Glycerophosphoryl diester phosphodiesterase family protein                               | 2434 |
| SAUSA300_1020 |                                                                                          |      |
| SAUSA300_1791 | cmp-binding-factor 1 (cbf1)                                                              | 2435 |
|               | DNA-directed RNA polymerase, delta subunit (rpoE) [2.7.7.6]                              | 2436 |
| SAUSA300_2082 |                                                                                          |      |
| SAUSA300_2583 | putative glycosyl transferase                                                            | 2437 |
| SAUSA300_0461 | DNA polymerase III delta subunit (holB) [2.7.7.7]                                        | 2438 |
| SAUSA300_0978 | ABC transporter, ATP-binding protein                                                     | 2439 |
| SAUSA300_2557 | ABC transporter protein                                                                  | 2440 |
|               | phosphonate ABC transporter, permease protein (phnE)                                     | 2441 |
| SAUSA300_0142 |                                                                                          |      |

|                  |                                                                                                    |      |
|------------------|----------------------------------------------------------------------------------------------------|------|
| SAUSA300_0629    | penicillin-binding protein 4 (pbp4) [3.4.16.4]                                                     | 2442 |
| SAUSA300_1714    | riboflavin synthase, alpha subunit (ribE) [2.5.1.9]                                                | 2443 |
| SAUSA300_2333    | nitrite extrusion protein (narK)                                                                   | 2444 |
| pUSA03_0003-s1   | Isoleucyl-tRNA synthetase, mupirocin resistant protein (ileS) [6.1.1.5]                            | 2445 |
| SAUSA300_1995    | sucrose operon repressor (scrR)                                                                    | 2446 |
| SAUSA300_2135    | iron compound ABC transporter, permease protein                                                    | 2447 |
| SAUSA300_0124    | HPCH/HPAI aldolase family protein                                                                  | 2448 |
| SAUSA300_0012    | putative homoserine O-acetyltransferase                                                            | 2449 |
| SAUSA300_2383    | amino acid permease                                                                                | 2450 |
| pUSA03_0008      | transposase                                                                                        | 2451 |
| SAUSA300_1970    | putative exonuclease                                                                               | 2452 |
| SAUSA300_2406    | putative transporter                                                                               | 2453 |
| pUSA03_0029      | conserved hypothetical protein                                                                     | 2454 |
| SAUSA300_2007    | acetolactate synthase, large subunit (ilvB) [2.2.1.6]                                              | 2455 |
| SAUSA300_0273    | putative membrane protein                                                                          | 2456 |
| SAUSA300_0313    | putative nucleoside permease NupC                                                                  | 2457 |
| SAUSA300_1293    | diaminopimelate decarboxylase (lysA) [4.1.1.20]                                                    | 2458 |
| SAUSA300_1101    | putative fibronectin/fibrinogen binding protein                                                    | 2459 |
| SAUSA300_2201    | 50S ribosomal protein L2 (rplB)                                                                    | 2460 |
| SAUSA300_1580    | bacterial luciferase family protein                                                                | 2461 |
| SAUSA300_2103    | ABC transporter, ATP-binding protein                                                               | 2462 |
| SAUSA300_2356    | fmhA protein (fmhA)                                                                                | 2463 |
| SAUSA300_2207    | xanthine/uracil permease family protein                                                            | 2464 |
| SAUSA300_2395    | amino acid permease                                                                                | 2465 |
| SAUSA300_1247    | conserved hypothetical protein                                                                     | 2466 |
| SAUSA300_2412    | conserved hypothetical protein                                                                     | 2467 |
| SAUSA300_1522    | DNA primase (dnaG) [2.7.7.-]                                                                       | 2468 |
| SAUSA300_0033    | methicillin-resistance MecR1 regulatory protein                                                    | 2469 |
| SAUSA300_1687-s3 | FtsK/SpoIIIE family protein                                                                        | 2470 |
| SAUSA300_0047    | conserved hypothetical protein                                                                     | 2471 |
| SAUSA300_1789    | conserved hypothetical protein                                                                     | 2472 |
| SAUSA300_1579    | aminotransferase, class V                                                                          | 2473 |
| SAUSA300_2397    | putative transport protein                                                                         | 2474 |
| SAUSA300_1683    | chorismate mutase/phospho-2-dehydro-3-deoxyheptonate aldolase [5.4.99.5]                           | 2475 |
| SAUSA300_2537    | L-lactate dehydrogenase [1.1.1.27]                                                                 | 2476 |
| SAUSA300_1456    | alpha glucosidase [3.2.1.20]                                                                       | 2477 |
| SAUSA300_0836    | dltB protein (dltB)                                                                                | 2478 |
| SAUSA300_1137    | ribonuclease HII (rnhB) [3.1.26.4]                                                                 | 2479 |
| SAUSA300_0747    | thioredoxin-disulfide reductase (trxB) [1.8.1.9]                                                   | 2480 |
| SAUSA300_2319    | pyridine nucleotide-disulfide oxidoreductase                                                       | 2481 |
| SAUSA300_2001    | similar to DNA mismatch repair protein                                                             | 2482 |
| SAUSA300_1042    | DNA-dependent DNA polymerase family X                                                              | 2483 |
| SAUSA300_2501    | phytoene dehydrogenase                                                                             | 2484 |
| SAUSA300_1649-s2 | DNA polymerase III, alpha subunit (dnaE) [2.7.7.7] oxidoreductase, short chain                     | 2485 |
| SAUSA300_2516    | dehydrogenase/reductase family                                                                     | 2486 |
| SAUSA300_0448    | PTS system, trehalose-specific IIBC component (treP) [2.7.1.69]                                    | 2487 |
| SAUSA300_0760    | phosphopyruvate hydratase (eno) [4.2.1.11]                                                         | 2488 |
| SAUSA300_2442    | gluconate permease (gntP)                                                                          | 2489 |
| SAUSA300_0814    | conserved hypothetical protein                                                                     | 2490 |
| SAUSA300_0164    | capsular polysaccharide biosynthesis protein Cap5M (cap5M)                                         | 2491 |
| SAUSA300_1305    | 2-oxoglutarate dehydrogenase, E2 component, dihydrolipoamide succinyltransferase (sucB) [2.3.1.61] | 2492 |
| SAUSA300_0579    | conserved hypothetical protein                                                                     | 2493 |
| SAUSA300_1025    | conserved hypothetical protein                                                                     | 2494 |
| SAUSA300_2293    | magnesium and cobalt transport protein (corA)                                                      | 2495 |

|               |                                                                     |      |
|---------------|---------------------------------------------------------------------|------|
| SAUSA300_0704 | ABC transporter, ATP-binding protein                                | 2496 |
| SAUSA300_1728 | oxidoreductase, aldo/keto reductase family                          | 2497 |
| SAUSA300_0091 | putative permease                                                   | 2498 |
| SAUSA300_0382 | sodium:dicarboxylate symporter family protein                       | 2499 |
| SAUSA300_0588 | conserved hypothetical protein                                      | 2500 |
| SAUSA300_2312 | malate:quinone-oxidoreductase (mqo) [1.1.99.16]                     | 2501 |
| SAUSA300_1972 | integrase (int)                                                     | 2502 |
| SAUSA300_0903 | conserved hypothetical protein                                      | 2503 |
| SAUSA300_2288 | ABC transporter, ATP-binding protein                                | 2504 |
|               | capsular polysaccharide biosynthesis protein Cap1C                  |      |
| SAUSA300_2596 | (cap1C) [3.1.3.48]                                                  | 2505 |
| SAUSA300_0198 | conserved hypothetical protein                                      | 2506 |
| SAUSA300_2265 | putative amino acid permease                                        | 2507 |
| SAUSA300_2622 | conserved hypothetical protein                                      | 2508 |
| SAUSA300_0093 | transcriptional regulator, LysR family domain protein               | 2509 |
| SAUSA300_1252 | amino acid carrier protein                                          | 2510 |
| SAUSA300_2487 | ferrous iron transport protein B (feoB)                             | 2511 |
| SAUSA300_0610 | putative Na <sup>+</sup> /H <sup>+</sup> antiporter, MnhA component | 2512 |
| pUSA03_0002   | IS431mec-like transposase                                           | 2513 |
|               | 2-C-methyl-D-erythritol 4-phosphate                                 |      |
| SAUSA300_0249 | cytidyltransferase [2.7.7.60]                                       | 2514 |
| SAUSA300_2273 | Na <sup>+</sup> /H <sup>+</sup> antiporter family protein           | 2515 |
| SAUSA300_1372 | conserved hypothetical protein                                      | 2516 |
| SAUSA300_0869 | exonuclease RexB (rexB)                                             | 2517 |
| SAUSA300_0549 | glycosyl transferase, group 1 family protein [2.4.1.-]              | 2518 |
| SAUSA300_2305 | transposase, truncation                                             | 2519 |
| SAUSA300_2115 | IS1181, transposase (tnp)                                           | 2520 |
| SAUSA300_1897 | sodium-dependent transporter                                        | 2521 |
|               | adenosylmethionine-8-amino-7-oxononanoate                           |      |
| SAUSA300_2372 | transaminase (bioA) [2.6.1.62]                                      | 2522 |
|               | 2-succinyl-6-hydroxy-2,4-cyclohexadiene-1-                          |      |
|               | carboxylic acid synthase/2-oxoglutarate                             |      |
| SAUSA300_0946 | decarboxylase (menD) [4.1.1.71]                                     | 2523 |
| SAUSA300_0174 | conserved hypothetical protein                                      | 2524 |
| SAUSA300_0746 | TPR domain protein                                                  | 2525 |
| pUSA02_0003   | replication initiation protein                                      | 2526 |
|               | acetyl-CoA carboxylase, biotin carboxylase (accC)                   |      |
| SAUSA300_1563 | [6.4.1.2]                                                           | 2527 |
| SAUSA300_1557 | hydrolase, HAD-superfamily, subfamily IIIA [3.1.3.-]                | 2528 |
| SAUSA300_0617 | Na <sup>+</sup> /H <sup>+</sup> antiporter                          | 2529 |
|               | respiratory nitrate reductase, alpha subunit                        |      |
| SAUSA300_2343 | [1.7.99.4]                                                          | 2530 |
| SAUSA300_0952 | aminotransferase, class I [2.6.1.-]                                 | 2531 |
| SAUSA300_2304 | putative membrane protein                                           | 2532 |
| SAUSA300_1164 | tRNA pseudouridine synthase B (truB) [4.2.1.70]                     | 2533 |
| SAUSA300_0665 | acetyltransferase, GNAT family                                      | 2534 |
| SAUSA300_0648 | ABC transporter, permease protein                                   | 2535 |
| SAUSA300_2587 | accessory secretory protein Asp1                                    | 2536 |
| SAUSA300_1170 | transcriptional regulator, GntR family                              | 2537 |
| SAUSA300_0248 | putative teichoic acid biosynthesis protein F                       | 2538 |
| SAUSA300_0936 | ABC transporter, ATP-binding protein                                | 2539 |
|               | putative restriction/modification system specificity                |      |
| SAUSA300_0406 | protein                                                             | 2540 |
| SAUSA300_0653 | transcriptional regulator, AraC family                              | 2541 |
|               | tRNA (5-methylaminomethyl-2-thiouridylate)-                         |      |
| SAUSA300_1578 | methyltransferase (trmU) [2.1.1.61]                                 | 2542 |
| SAUSA300_1693 | conserved hypothetical protein                                      | 2543 |
| SAUSA300_0630 | ABC transporter, ATP-binding protein                                | 2544 |
| SAUSA300_2497 | aminotransferase, class I [2.6.1.-]                                 | 2545 |
| SAUSA300_0928 | competence transcription factor (comK)                              | 2546 |

|                  |                                                                                                       |      |
|------------------|-------------------------------------------------------------------------------------------------------|------|
| SAUSA300_0086    | conserved hypothetical protein                                                                        | 2547 |
| SAUSA300_1062    | ornithine carbamoyltransferase (argF) [2.1.3.3]                                                       | 2548 |
| SAUSA300_2334    | conserved hypothetical protein                                                                        | 2549 |
| SAUSA300_2044    | cardiolipin synthetase (cls) [2.7.8.-]                                                                | 2550 |
| SAUSA300_1894    | nicotinate phosphoribosyltransferase [2.4.2.11]                                                       | 2551 |
| SAUSA300_2575    | transcriptional antiterminator, BglG family                                                           | 2552 |
| SAUSA300_0251    | putative teichoic acid biosynthesis protein                                                           | 2553 |
| SAUSA300_1039    | ribonuclease HIII (rnhC) [3.1.26.-]                                                                   | 2554 |
| SAUSA300_0060    | putative transposase                                                                                  | 2555 |
| SAUSA300_0473    | pur operon repressor (purR)                                                                           | 2556 |
| SAUSA300_1094    | dihydroorotase (pyrC) [3.5.2.3]                                                                       | 2557 |
| SAUSA300_2556    | ABC transporter protein                                                                               | 2558 |
| SAUSA300_1810    | IS1181, transposase                                                                                   | 2559 |
| SAUSA300_0388    | inosine-5-monophosphate dehydrogenase (guaB) [1.1.1.205]                                              | 2560 |
| SAUSA300_1306    | 2-oxoglutarate dehydrogenase, E1 component (sucA) [1.2.4.2]                                           | 2561 |
| SAUSA300_0566    | amino acid permease                                                                                   | 2562 |
| SAUSA300_1189    | DNA mismatch repair protein mutL (mutL)                                                               | 2563 |
| SAUSA300_0201    | peptide ABC transporter, permease protein                                                             | 2564 |
| SAUSA300_0226    | 3-hydroxyacyl-CoA dehydrogenase                                                                       | 2565 |
| SAUSA300_2240    | urease, alpha subunit (ureC) [3.5.1.5]                                                                | 2566 |
| SAUSA300_0379    | alkyl hydroperoxide reductase, subunit F (ahpF) [1.6.4.-]                                             | 2567 |
| SAUSA300_1177    | competence/damage-inducible protein cinA (cinA)                                                       | 2568 |
| SAUSA300_1135    | putative membrane protein                                                                             | 2569 |
| SAUSA300_0333    | transcriptional antiterminator, BglG family                                                           | 2570 |
| SAUSA300_0503    | transcriptional regulator, gntR family protein                                                        | 2571 |
| SAUSA300_0877    | Chaperone clpB (clpB)                                                                                 | 2572 |
| SAUSA300_0670    | ABC transporter, ATP-binding protein, MsbA family                                                     | 2573 |
| SAUSA300_0051    | integrase, authentic frameshift phi77 ORF004-like protein, putative phage tail component              | 2574 |
| SAUSA300_1929    | component                                                                                             | 2575 |
| SAUSA300_1345    | asparaginyl-tRNA synthetase (asnS) [6.1.1.22]                                                         | 2576 |
| SAUSA300_1128    | signal recognition particle-docking protein FtsY (ftsY)                                               | 2577 |
| SAUSA300_0783    | phosphoglycerate mutase family protein                                                                | 2578 |
| SAUSA300_0319    | putative membrane protein                                                                             | 2579 |
| SAUSA300_1597    | holliday junction DNA helicase RuvB (ruvB)                                                            | 2580 |
| SAUSA300_1846    | conserved hypothetical protein                                                                        | 2581 |
| SAUSA300_0939    | glycosyl transferase, group 1 family protein [2.4.1.5 2.4.1.52]                                       | 2582 |
| SAUSA300_1701    | conserved hypothetical protein                                                                        | 2583 |
| SAUSA300_0914    | sodium:alanine symporter family protein                                                               | 2584 |
| SAUSA300_2627    | 2-oxoglutarate/malate translocator                                                                    | 2585 |
| SAUSA300_2109-s3 | truncated FmtB protein (fmtB)                                                                         | 2586 |
| SAUSA300_2227    | molybdopterin biosynthesis protein B (moeB)                                                           | 2587 |
| SAUSA300_0962    | quinol oxidase, subunit I (qoxB) [1.9.3.-]                                                            | 2588 |
| SAUSA300_1878    | RNA methyltransferase, TrmA family (rumA) [2.1.1.-] oxygen-independent coproporphyrinogen III oxidase | 2589 |
| SAUSA300_1543    | [1.3.99.22]                                                                                           | 2590 |
| SAUSA300_1654    | proline dipeptidase [3.4.13.9]                                                                        | 2591 |
| SAUSA300_1590    | GTP pyrophosphokinase [2.7.6.5]                                                                       | 2592 |
| SAUSA300_2393    | glycine betaine/carnitine/choline ABC transporter ATP-binding protein (opuCa) [3.6.3.32]              | 2593 |
| SAUSA300_1737    | O-succinylbenzoate-CoA ligase (menE) [6.2.1.26]                                                       | 2594 |
| SAUSA300_2065    | UDP-N-acetylglucosamine 2-epimerase [5.1.3.14]                                                        | 2595 |
| SAUSA300_0335    | MATE efflux family protein                                                                            | 2596 |
| SAUSA300_1752    | type I restriction-modification system, M subunit (hsdM) [2.1.1.72]                                   | 2597 |

|                  |                                                                                                                 |      |
|------------------|-----------------------------------------------------------------------------------------------------------------|------|
| SAUSA300_0996    | dihydrolipoamide dehydrogenase (lpdA) [1.8.1.4]<br>putative glycerophosphoryl diester                           | 2598 |
| SAUSA300_1667    | phosphodiesterase                                                                                               | 2599 |
| SAUSA300_2020    | metallopeptidase, SprT family                                                                                   | 2600 |
| SAUSA300_0337    | glycerol-3-phosphate transporter (glpT)                                                                         | 2601 |
| SAUSA300_2538    | amino acid permease family protein                                                                              | 2602 |
| SAUSA300_0729    | integral membrane protein                                                                                       | 2603 |
| SAUSA300_1425    | conserved hypothetical phage protein                                                                            | 2604 |
| SAUSA300_0210    | maltose ABC transporter, permease protein                                                                       | 2605 |
| SAUSA300_1525    | glycyl-tRNA synthetase (glyS) [6.1.1.14]                                                                        | 2606 |
| SAUSA300_1718    | arsenical pump membrane protein (arsB)<br>bifunctional purine biosynthesis protein (purH)<br>[2.1.2.3 3.5.4.10] | 2607 |
| SAUSA300_0975    |                                                                                                                 | 2608 |
| SAUSA300_0537    | L-ribulokinase [2.7.1.16]                                                                                       | 2609 |
| SAUSA300_1610    | folylpolyglutamate synthase (folC) [6.3.2.17]                                                                   | 2610 |
| SAUSA300_0925    | 5 nucleotidase family protein                                                                                   | 2611 |
| SAUSA300_0955-s3 | autolysin (atl) [3.5.1.28]                                                                                      | 2612 |
| SAUSA300_1883    | high affinity proline permease (putP)                                                                           | 2613 |
| SAUSA300_2000    | ABC transporter, ATP-binding protein (vga)                                                                      | 2614 |
| SAUSA300_0654    | staphylococcal accessory protein X (sarX)                                                                       | 2615 |
| pUSA03_0001      | replication initiator protein (repA)                                                                            | 2616 |
| SAUSA300_0702    | urea amidolyase-related protein                                                                                 | 2617 |
| SAUSA300_1876    | DNA polymerase IV                                                                                               | 2618 |
| SAUSA300_0981    | conserved hypothetical protein                                                                                  | 2619 |
| SAUSA300_1651    | CBS domain protein                                                                                              | 2620 |
| SAUSA300_0487    | MesJ/Ycf62 family protein                                                                                       | 2621 |
| SAUSA300_1584    | ATPase, AAA family                                                                                              | 2622 |
| SAUSA300_0034    | IS1272, transposase                                                                                             | 2623 |
| SAUSA300_0064    | arginine/ornithine antiporter (arcD)                                                                            | 2624 |
| SAUSA300_2096    | mannose-6-phosphate isomerase (manA) [5.3.1.8]                                                                  | 2625 |
| SAUSA300_0873    | coenzyme A disulfide reductase (cdr) [1.8.1.14]<br>glucose-6-phosphate 1-dehydrogenase (zwf)<br>[1.1.1.49]      | 2626 |
| SAUSA300_1454    |                                                                                                                 | 2627 |
| SAUSA300_0339    | conserved hypothetical protein<br>type I restriction-modification system, M subunit<br>(hsdM) [2.1.1.72]        | 2628 |
| SAUSA300_0405    |                                                                                                                 | 2629 |
| SAUSA300_0829    | lipoic acid synthetase (lipA)                                                                                   | 2630 |
| SAUSA300_2014    | threonine dehydratase (ilvA) [4.3.1.19]                                                                         | 2631 |
| SAUSA300_0924    | sodium transport family protein                                                                                 | 2632 |
| SAUSA300_2531    | hydrolase, CocE/NonD family                                                                                     | 2633 |
| SAUSA300_1156    | prolyl-tRNA synthetase (proS) [6.1.1.15]                                                                        | 2634 |
| SAUSA300_2645    | glucose-inhibited division protein A (gidA)                                                                     | 2635 |
| SAUSA300_1357    | chorismate synthase (aroC) [4.2.3.5]                                                                            | 2636 |
| SAUSA300_2542    | putative AMP-binding enzyme                                                                                     | 2637 |
| SAUSA300_0228    | acyl-CoA synthetase FadE (fadE)                                                                                 | 2638 |
| SAUSA300_0845    | cytosol aminopeptidase (ampA) [3.4.11.1]                                                                        | 2639 |
| SAUSA300_0387    | xanthine permease (pbuX)                                                                                        | 2640 |
| SAUSA300_1595    | queuine tRNA-ribosyltransferase (tgt) [2.4.2.29]                                                                | 2641 |
| SAUSA300_0528-s3 | DNA-directed RNA polymerase, beta subunit (rpoC)<br>[2.7.7.6]                                                   | 2642 |
| SAUSA300_0945    | isochorismate synthase family protein [5.4.99.6<br>5.4.4.2]                                                     | 2643 |
| SAUSA300_1071    | conserved hypothetical protein                                                                                  | 2644 |
| SAUSA300_1438    | phiSLT ORF401-like protein, integrase                                                                           | 2645 |
| SAUSA300_1886    | ATP-dependent DNA helicase, PcrA (pcrA) [3.6.1.-]                                                               | 2646 |
| SAUSA300_0755    | glycolytic operon regulator                                                                                     | 2647 |
| SAUSA300_0328    | lipoate-protein ligase A family protein [6.-.-.]                                                                | 2648 |
| SAUSA300_1045    | excinuclease ABC, C subunit (uvrC)                                                                              | 2649 |
| SAUSA300_0921    | peptide chain release factor 3 (prfC)<br>phage related DNA polymerase, family A (polA)<br>[2.7.7.7]             | 2650 |
| SAUSA300_1423    |                                                                                                                 | 2651 |

SAUSA300\_1858

conserved hypothetical protein

2652



**Supplementary Table S3. All antigens positive for IgG reactivity in at least one sample by protein array.** Ranking was determined as in Table 3, and antigens are presented in this table if the reactivity was at least two-fold above background. Ranking number, locus tag and protein name/description is shown for each antigen.

| <b>Locus Tag</b> | <b>Protein Name/Description</b>                                                                             | <b>Rank</b> |
|------------------|-------------------------------------------------------------------------------------------------------------|-------------|
| SAUSA300_0113    | immunoglobulin G binding protein A (SpA)                                                                    | 1           |
| SAUSA300_0398    | superantigen-like protein SSL4                                                                              | 2           |
| SAUSA300_0403    | superantigen-like protein SSL9                                                                              | 3           |
| SAUSA300_2366    | gamma-hemolysin component C (hlgC)                                                                          | 4           |
| SAUSA300_2579    | N-acetylmuramoyl-L-alanine amidase domain protein<br>MAP domain-containing protein; extracellular adherence | 5           |
| SAUSA300_0883    | protein Eap                                                                                                 | 6           |
| SAUSA300_2364    | IgG-binding protein SBI (sbi)                                                                               | 7           |
| SAUSA300_1029    | Iron-regulated surface determinant Protein A (IsdA)                                                         | 8           |
| SAUSA300_1028    | Iron-regulated surface determinant Protein B (IsdB)                                                         | 9           |
| SAUSA300_1920    | chemotaxis-inhibiting protein CHIPS (chs)                                                                   | 10          |
| SAUSA300_1382    | Panton-Valentine leukocidin, LukS-PV (lukS-PV)                                                              | 11          |
| SAUSA300_2367    | gamma-hemolysin component B (hlgB)                                                                          | 12          |
| SAUSA300_1768    | leukotoxin LukD (lukD)                                                                                      | 13          |
| SAUSA300_1917    | map protein, programmed frameshift (map)                                                                    | 14          |
| SAUSA300_0651    | peptidase M23                                                                                               | 15          |
| SAUSA300_0951    | V8 protease (sspA) [3.4.21.19]                                                                              | 16          |
| SAUSA300_0408    | heme uptake protein IsdB                                                                                    | 17          |
| SAUSA300_0438    | CHAP domain family                                                                                          | 18          |
| SAUSA300_0409    | peroxidase inhibitor                                                                                        | 19          |
| SAUSA300_0693    | electron transfer DM13<br>Sugar phosphate isomerase/epimerase PFAM family                                   | 20          |
| SAUSA300_0214    | PF07582<br>immunodominant staphylococcal antigen A precursor                                                | 21          |
| SAUSA300_2506    | (isaA)                                                                                                      | 22          |
| SAUSA300_1058    | alpha-hemolysin precursor                                                                                   | 23          |
| SAUSA300_0548-s2 | sdrE protein (sdrE)                                                                                         | 24          |
| SAUSA300_0776    | thermonuclease precursor (nuc) [3.1.31.1]                                                                   | 25          |
| SAUSA300_0547-s2 | sdrD protein (sdrD)                                                                                         | 26          |
| SAUSA300_2572    | zinc metalloproteinase aureolysin (aur) [3.4.24.29]                                                         | 27          |
| SAUSA300_0370    | SEP staphylococcal enterotoxin                                                                              | 28          |
| SAUSA300_1030    | iron transport associated domain protein<br>acetyl-CoA carboxylase, biotin carboxyl carrier protein         | 29          |
| SAUSA300_1476    | (accB)                                                                                                      | 30          |
| SAUSA300_1922    | staphylokinase precursor (sak)<br>glycerophosphoryl diester phosphodiesterase (glpQ)                        | 31          |
| SAUSA300_0862    | [3.1.4.46]                                                                                                  | 32          |
| SAUSA300_1055    | fibrinogen-binding protein (efb)                                                                            | 33          |
| SAUSA300_1481    | putative mating channel protein                                                                             | 34          |
| SAUSA300_0955-s1 | autolysin (atl) [3.5.1.28]<br>secretory extracellular matrix and plasma binding protein                     | 35          |
| SAUSA300_0774    | (empbp)                                                                                                     | 36          |
| SAUSA300_0950    | cysteine protease precursor (sspB) [3.4.22.48]                                                              | 37          |
| SAUSA300_1381    | Panton-Valentine leukocidin, LukF-PV (lukF-PV)                                                              | 38          |
| SAUSA300_2441    | fibronectin binding protein A (fnbA)<br>iron compound ABC transporter, iron compound-binding                | 39          |
| SAUSA300_2136    | protein                                                                                                     | 40          |
| SAUSA300_2440    | fibronectin binding protein B (fnbB)                                                                        | 41          |
| SAUSA300_0242    | sorbitol dehydrogenase (gutB) [1.1.1.14]                                                                    | 42          |
| SAUSA300_1985    | serine-aspartate repeat family protein, SdrH (sdrH)<br>membrane protein YhgE, phage infection protein (PIP) | 43          |
| SAUSA300_0279    | family, type VII secretion protein EsaA                                                                     | 44          |
| SAUSA300_0708    | histidinol-phosphate aminotransferase (hisC) [2.6.1.9]                                                      | 45          |
| SAUSA300_0399    | superantigen-like protein SSL5                                                                              | 46          |
| SAUSA300_0955-s2 | autolysin (atl) [3.5.1.28]                                                                                  | 47          |

|                  |                                                                               |     |
|------------------|-------------------------------------------------------------------------------|-----|
| SAUSA300_0395    | superantigen-like protein SSL1                                                | 48  |
| SAUSA300_1031    | heme ABC transporter permease                                                 | 49  |
| SAUSA300_1512    | penicillin-binding protein 3 (pbp3)                                           | 50  |
| SAUSA300_0546    | sdrC protein (sdrC)                                                           | 51  |
| SAUSA300_0404    | exotoxin                                                                      | 52  |
| SAUSA300_0401    | exotoxin                                                                      | 53  |
| SAUSA300_2146    | alcohol dehydrogenase, zinc-containing                                        | 54  |
| SAUSA300_2039    | D-alanine--D-alanine ligase (ddl) [6.3.2.4]                                   | 55  |
| SAUSA300_2219    | molybdenum cofactor biosynthesis protein A (moaA)                             | 56  |
| SAUSA300_2441-s2 | fibronectin binding protein A (fnbA)                                          | 57  |
| SAUSA300_1890    | staphopain A                                                                  | 58  |
| SAUSA300_0307    | 5-nucleotidase, lipoprotein e(P4) family                                      | 59  |
| SAUSA300_0589    | aldo/keto reductase family protein                                            | 60  |
| SAUSA300_0602    | conserved hypothetical protein                                                | 61  |
| SAUSA300_2573    | immunodominant antigen B (isaB)                                               | 62  |
| SAUSA300_0320    | triacylglycerol lipase precursor [3.1.1.3]                                    | 63  |
| SAUSA300_2565    | clumping factor B (clfB)                                                      | 64  |
| SAUSA300_1975    | Aerolysin/Leukocidin family protein                                           | 65  |
| SAUSA300_1061    | putative exotoxin 3                                                           | 66  |
| SAUSA300_2441-s1 | fibronectin binding protein A (fnbA)                                          | 67  |
| SAUSA300_0573    | diphosphomevalonate decarboxylase (mvaD) [4.1.1.33]                           | 68  |
| SAUSA300_0038    | cassette chromosome recombinase A (ccrA)                                      | 69  |
| SAUSA300_0547-s1 | sdrD protein (sdrD)                                                           | 70  |
| SAUSA300_0025    | 5-nucleotidase family protein                                                 | 71  |
| SAUSA300_2380    | conserved hypothetical protein                                                | 72  |
| SAUSA300_1186    | conserved hypothetical protein                                                | 73  |
| SAUSA300_2476    | phosphotransferase system, glucose-specific IIABC component (ptsG) [2.7.1.69] | 74  |
| SAUSA300_0396    | exotoxin 7 (set7)                                                             | 75  |
| SAUSA300_1988    | delta-hemolysin precursor                                                     | 76  |
| pUSA03_0034      | conserved hypothetical protein                                                | 77  |
| SAUSA300_1613    | putative abrB protein                                                         | 78  |
| SAUSA300_1664    | septation ring formation regulator EzrA (ezrA)                                | 79  |
| SAUSA300_1059    | putative exotoxin 1                                                           | 80  |
| SAUSA300_2530    | transcriptional regulator, TetR family                                        | 81  |
| SAUSA300_0229    | putative acyl-CoA transferase FadX                                            | 82  |
| SAUSA300_0734    | putative comf operon protein 1                                                | 83  |
| SAUSA300_2226    | molybdenum cofactor biosynthesis protein B (moaB)                             | 84  |
| SAUSA300_0351    | putative membrane protein                                                     | 85  |
| SAUSA300_1346    | putative DnaQ family exonuclease/DinG family helicase                         | 86  |
| SAUSA300_0441    | acetyltransferase, GNAT family                                                | 87  |
| SAUSA300_0955    | autolysin (atl) [3.5.1.28]                                                    | 88  |
| SAUSA300_0830    | conserved hypothetical protein                                                | 89  |
| SAUSA300_2589    | LPXTG-motif cell wall surface anchor family protein                           | 90  |
| SAUSA300_2285    | aldose 1-epimerase (galM) [5.1.3.3]                                           | 91  |
| SAUSA300_1895    | nitric oxide synthase oxygenase                                               | 92  |
| SAUSA300_2641    | conserved hypothetical protein                                                | 93  |
| SAUSA300_1249    | conserved hypothetical protein                                                | 94  |
| SAUSA300_0364    | GTP-binding protein YchF (ychF)                                               | 95  |
| SAUSA300_1354    | conserved hypothetical protein                                                | 96  |
| SAUSA300_1330    | threonine dehydratase (ilvA) [4.3.1.19]                                       | 97  |
| SAUSA300_0082    | conserved hypothetical protein                                                | 98  |
| SAUSA300_1879    | conserved hypothetical protein                                                | 99  |
| SAUSA300_1095    | carbamoyl-phosphate synthase, small subunit (carA) [6.3.5.5]                  | 100 |
| SAUSA300_2101    | SAP domain protein                                                            | 101 |

|                  |                                                                     |     |
|------------------|---------------------------------------------------------------------|-----|
| SAUSA300_1514    | ferric uptake regulation protein ( <i>fur</i> )                     | 102 |
| SAUSA300_2322    | transcriptional regulator, TetR family                              | 103 |
| SAUSA300_0297    | putative lipoprotein                                                | 104 |
| SAUSA300_1677    | cell wall surface anchor family protein                             | 105 |
| SAUSA300_0397    | exotoxin                                                            | 106 |
|                  | iron compound ABC transporter, iron compound-binding                |     |
| SAUSA300_0117    | protein SirA ( <i>sirA</i> )                                        | 107 |
| SAUSA300_2351    | similar to Zn-binding lipoprotein <i>adca</i>                       | 108 |
| SAUSA300_2253    | secretory antigen precursor <i>SsaA</i> ( <i>ssaA</i> )             | 109 |
|                  | phenylalanyl-tRNA synthetase, alpha subunit ( <i>pheS</i> )         |     |
| SAUSA300_1037    | [6.1.1.20]                                                          | 110 |
| SAUSA300_0224    | staphylocoagulase precursor ( <i>coa</i> )                          | 111 |
| SAUSA300_1961    | phiPVL ORF41-like protein                                           | 112 |
| SAUSA300_0437    | NLPA lipoprotein                                                    | 113 |
| SAUSA300_1327-s1 | cell surface protein                                                | 114 |
|                  | molybdenum ABC transporter, molybdenum-binding                      |     |
| SAUSA300_2230    | protein ModA ( <i>modA</i> )                                        | 115 |
| SAUSA300_0547    | <i>sdrD</i> protein ( <i>sdrD</i> )                                 | 116 |
| SAUSA300_2213-s2 | AcrB/AcrD/AcrF family protein                                       | 117 |
|                  | capsular polysaccharide biosynthesis protein Cap1B                  |     |
| SAUSA300_2597    | ( <i>cap1B</i> ) [2.7.1.112]                                        | 118 |
| SAUSA300_0676    | anion transporter family protein                                    | 119 |
| SAUSA300_1862    | conserved hypothetical protein                                      | 120 |
|                  | D-isomer specific 2-hydroxyacid dehydrogenase family                |     |
| SAUSA300_1843    | protein                                                             | 121 |
| SAUSA300_0703    | sulfatase family protein [3.1.6.-]                                  | 122 |
| SAUSA300_2447    | conserved hypothetical protein                                      | 123 |
| SAUSA300_0160    | capsular polysaccharide biosynthesis protein Cap5I ( <i>cap5I</i> ) | 124 |
| SAUSA300_2336    | transcriptional regulator, MerR family                              | 125 |
| SAUSA300_1052    | fibrinogen-binding protein                                          | 126 |
| SAUSA300_1685    | conserved hypothetical protein                                      | 127 |
| SAUSA300_1140    | cell wall hydrolase ( <i>lytN</i> )                                 | 128 |
| SAUSA300_0711    | conserved hypothetical protein                                      | 129 |
| SAUSA300_1671    | conserved hypothetical protein                                      | 130 |
| SAUSA300_1197    | glutathione peroxidase                                              | 131 |
| SAUSA300_1669    | aminotransferase, class V [1.12.-.-]                                | 132 |
| SAUSA300_0360    | Cys/Met metabolism PLP-dependent enzyme [4.4.1.8]                   | 133 |
| SAUSA300_1757    | serine protease SplB ( <i>splB</i> ) [3.4.21.19]                    | 134 |
| SAUSA300_2164    | conserved hypothetical protein                                      | 135 |
| SAUSA300_0400    | exotoxin                                                            | 136 |
| SAUSA300_1758    | serine protease SplA ( <i>splA</i> ) [3.4.21.19]                    | 137 |
| SAUSA300_1053    | conserved hypothetical protein                                      | 138 |
| SAUSA300_1702-s2 | cell wall surface anchor family protein                             | 139 |
| SAUSA300_0958    | transcriptional regulator                                           | 140 |
| SAUSA300_0964    | chitinase-related protein [3.2.1.14]                                | 141 |
| SAUSA300_0739    | LysM domain protein                                                 | 142 |
| SAUSA300_0255    | sensory transduction protein <i>LytR</i>                            | 143 |
| SAUSA300_0279-s2 | putative membrane protein                                           | 144 |
| SAUSA300_2110-s1 | truncated <i>FmtB</i> protein ( <i>fmtB</i> )                       | 145 |
| SAUSA300_1753    | serine protease SplF ( <i>splF</i> ) [3.4.21.19]                    | 146 |
| SAUSA300_0277    | putative staphyloxanthin biosynthesis protein                       | 147 |
|                  | UDP-N-acetylglucosamine 1-carboxyvinyltransferase 1                 |     |
| SAUSA300_2055    | ( <i>murA</i> ) [2.5.1.7]                                           | 148 |
| SAUSA300_1755    | serine protease SplD ( <i>splD</i> ) [3.4.21.19]                    | 149 |
| SAUSA300_0548    | <i>sdrE</i> protein ( <i>sdrE</i> )                                 | 150 |
| SAUSA300_0721    | transferrin receptor                                                | 151 |

|                   |                                                             |     |
|-------------------|-------------------------------------------------------------|-----|
| SAUSA300_1711     | proline dehydrogenase (putA) [1.5.99.8]                     | 152 |
|                   | phosphoribosylformylglycinamide synthase II (purL)          |     |
| SAUSA300_0971     | [6.3.5.3]                                                   | 153 |
| SAUSA300_0402     | exotoxin                                                    | 154 |
| SAUSA300_2589-s1  | LPXTG-motif cell wall surface anchor family protein         | 155 |
| SAUSA300_1327-s16 | cell surface protein                                        | 156 |
|                   | phi77 ORF001-like protein, phage tail tape measure          |     |
| SAUSA300_1930-s1  | protein                                                     | 157 |
| SAUSA300_1236     | conserved hypothetical protein                              | 158 |
| SAUSA300_1127     | chromosome segregation protein SMC (smc)                    | 159 |
| SAUSA300_1616     | uroporphyrinogen-III synthase (hemD) [4.2.1.75]             | 160 |
| SAUSA300_1699     | pseudouridine synthase, family 1                            | 161 |
| SAUSA300_1684     | conserved hypothetical protein                              | 162 |
| SAUSA300_1974     | Leukocidin/Hemolysin toxin family protein                   | 163 |
| SAUSA300_0987     | cytochrome D ubiquinol oxidase, subunit II [1.10.3.-]       | 164 |
| SAUSA300_2292     | isopentenyl-diphosphate delta-isomerase (fni) [5.3.3.2]     | 165 |
| SAUSA300_1091     | PyrR bifunctional protein (pyrR) [2.4.2.9]                  | 166 |
| SAUSA300_2041     | conserved hypothetical protein                              | 167 |
| SAUSA300_1998     | putative membrane protein                                   | 168 |
| pUSA03_0010       | transfer complex protein TraA (traA)                        | 169 |
|                   | phi SLT ORF 145-like protein, phage transcriptional         |     |
| SAUSA300_1407     | regulator                                                   | 170 |
| SAUSA300_1315     | PTS system, glucose-specific IIA component (crr) [2.7.1.69] | 171 |
| SAUSA300_1706     | conserved hypothetical protein                              | 172 |
| SAUSA300_2603     | triacylglycerol lipase precursor (lip) [3.1.1.3]            | 173 |
| SAUSA300_2259     | putative transcriptional regulator                          | 174 |
| SAUSA300_2473     | conserved hypothetical protein                              | 175 |
| SAUSA300_1973     | truncated beta-hemolysin                                    | 176 |
| SAUSA300_0092     | conserved hypothetical protein                              | 177 |
| SAUSA300_1792     | conserved hypothetical protein                              | 178 |
| SAUSA300_1870     | conserved hypothetical protein                              | 179 |
|                   | capsular polysaccharide biosynthesis protein Cap5F          |     |
| SAUSA300_0157     | (cap5F)                                                     | 180 |
| SAUSA300_2510     | conserved hypothetical protein                              | 181 |
| SAUSA300_2276     | peptidase, M20/M25/M40 family [3.5.1.14]                    | 182 |
| SAUSA300_0161     | capsular polysaccharide biosynthesis protein Cap5J (cap5J)  | 183 |
| SAUSA300_0326     | conserved hypothetical protein                              | 184 |
|                   | 2-oxoisovalerate dehydrogenase, E2 component,               |     |
| SAUSA300_1464     | dihydrolipoamide acetyltransferase [2.3.1.-]                | 185 |
| SAUSA300_2435     | cell wall surface anchor family protein                     | 186 |
| SAUSA300_1178     | recombinase A protein (recA)                                | 187 |
| SAUSA300_0860     | Ornithine aminotransferase (rocD) [2.6.1.13]                | 188 |
| SAUSA300_1333-s2  | conserved hypothetical protein                              | 189 |
| SAUSA300_0280     | conserved hypothetical protein                              | 190 |
| SAUSA300_0177     | conserved hypothetical protein                              | 191 |
| SAUSA300_2590     | conserved hypothetical protein                              | 192 |
| SAUSA300_1588     | N-acetylmuramoyl-L-alanine amidase (lytH)                   | 193 |
| SAUSA300_1593     | protein-export membrane protein SecF (secF)                 | 194 |
| SAUSA300_0181-s3  | non-ribosomal peptide synthetase                            | 195 |
| SAUSA300_1756     | serine protease SplC (splC) [3.4.21.19]                     | 196 |
| SAUSA300_2051     | conserved hypothetical protein                              | 197 |
| SAUSA300_0270     | peptidoglycan hydrolase (lytM) [3.4.24.75]                  | 198 |
| SAUSA300_0279-s1  | putative membrane protein                                   | 199 |
|                   | 3-isopropylmalate dehydratase, small subunit (leuD)         |     |
| SAUSA300_2013     | [4.2.1.33]                                                  | 200 |
| SAUSA300_2581     | putative surface anchored protein                           | 201 |

|                  |                                                                                                                                                     |     |
|------------------|-----------------------------------------------------------------------------------------------------------------------------------------------------|-----|
| SAUSA300_2110    | truncated FmtB protein (fmtB)                                                                                                                       | 202 |
| SAUSA300_0773    | putative staphylocoagulase                                                                                                                          | 203 |
| SAUSA300_2299    | multidrug resistance protein A, drug resistance transporter                                                                                         | 204 |
| SAUSA300_0548-s1 | sdrE protein (sdrE)                                                                                                                                 | 205 |
| SAUSA300_0489    | putative cell division protein FtsH                                                                                                                 | 206 |
| SAUSA300_1341    | penicillin binding protein 2 (pbp2) [2.4.2.-]                                                                                                       | 207 |
| SAUSA300_1097    | orotidine 5-phosphate decarboxylase (pyrF) [4.1.1.23]                                                                                               | 208 |
| SAUSA300_0099    | 1-phosphatidylinositol phosphodiesterase (plc) [3.1.4.10]                                                                                           | 209 |
| SAUSA300_0886    | 3-oxoacyl-(acyl-carrier-protein) synthase II (fabF) [2.3.1.41]                                                                                      | 210 |
| SAUSA300_0383    | conserved hypothetical protein                                                                                                                      | 211 |
| SAUSA300_2463    | D-lactate dehydrogenase (ddh) [1.1.1.28]                                                                                                            | 212 |
| SAUSA300_0841    | conserved hypothetical protein                                                                                                                      | 213 |
| SAUSA300_2321    | putative membrane protein                                                                                                                           | 214 |
| SAUSA300_2500    | glycosyl transferase                                                                                                                                | 215 |
| SAUSA300_0419    | staphylococcus tandem lipoprotein                                                                                                                   | 216 |
| SAUSA300_2161    | Hyaluronate lyase precursor (hysA) [4.2.2.1]                                                                                                        | 217 |
| SAUSA300_1863    | conserved hypothetical protein                                                                                                                      | 218 |
| SAUSA300_0769    | putative lipoprotein                                                                                                                                | 219 |
| SAUSA300_1606    | conserved hypothetical protein                                                                                                                      | 220 |
| SAUSA300_0995    | dihydrolipoamide acetyltransferase                                                                                                                  | 221 |
| SAUSA300_1428    | conserved hypothetical phage protein                                                                                                                | 222 |
| SAUSA300_2457    | phospholipase/carboxylesterase family protein                                                                                                       | 223 |
| SAUSA300_1299    | putative tellurite resistance protein                                                                                                               | 224 |
| SAUSA300_2166    | alpha-acetolactate synthase (alsS) [2.2.1.6]                                                                                                        | 225 |
| SAUSA300_2643    | putative chromosome partitioning protein, ParB family                                                                                               | 226 |
| SAUSA300_2109-s2 | truncated FmtB protein (fmtB)                                                                                                                       | 227 |
| SAUSA300_0798    | ABC transporter, substrate-binding protein<br>methylenetetrahydrofolate<br>dehydrogenase/methenyltetrahydrofolate cyclohydrolase<br>(foD) [1.5.1.5] | 228 |
| SAUSA300_0965    | teichoic acid biosynthesis protein X (tagX)                                                                                                         | 229 |
| SAUSA300_0627    | conserved hypothetical protein                                                                                                                      | 230 |
| SAUSA300_1905    | putative exotoxin 4                                                                                                                                 | 231 |
| SAUSA300_1060    | conserved hypothetical protein                                                                                                                      | 232 |
| SAUSA300_1361    | conserved hypothetical protein                                                                                                                      | 233 |
| SAUSA300_2505    | acetyltransferase, GNAT family [2.3.1.-]                                                                                                            | 234 |
| SAUSA300_1179    | conserved hypothetical protein                                                                                                                      | 235 |
| SAUSA300_0913    | putative membrane protein                                                                                                                           | 236 |
| SAUSA300_1023    | conserved hypothetical protein                                                                                                                      | 237 |
| SAUSA300_1707    | conserved hypothetical protein<br>phosphoenolpyruvate-protein phosphotransferase (ptsI)<br>[2.7.3.9]                                                | 238 |
| SAUSA300_0984    | putative teichoic acid biosynthesis protein B                                                                                                       | 239 |
| SAUSA300_0247    | ribonuclease R (rnr) [3.1.-.-]                                                                                                                      | 240 |
| SAUSA300_0764    | acetyltransferase, GNAT family family                                                                                                               | 241 |
| SAUSA300_0943    | putative NADP-dependent malic enzyme                                                                                                                | 242 |
| SAUSA300_1648    | trehalose operon repressor (treR)                                                                                                                   | 243 |
| SAUSA300_0450    | YycH protein                                                                                                                                        | 244 |
| SAUSA300_0022    | YibE/F-like protein                                                                                                                                 | 245 |
| SAUSA300_0443    | conserved hypothetical protein                                                                                                                      | 246 |
| SAUSA300_1652    | hippurate hydrolase [3.5.1.14]                                                                                                                      | 247 |
| SAUSA300_1291    | primase-related protein                                                                                                                             | 248 |
| SAUSA300_0469    | 2-oxoisovalerate dehydrogenase, E1 component, beta<br>subunit [1.2.4.1]                                                                             | 249 |
| SAUSA300_1465    | porphobilinogen deaminase (hemC) [2.5.1.61]                                                                                                         | 250 |
| SAUSA300_1617    |                                                                                                                                                     | 251 |

|                  |                                                                               |     |
|------------------|-------------------------------------------------------------------------------|-----|
| SAUSA300_0815    | Ear protein (ear)                                                             | 252 |
| SAUSA300_2110-s2 | truncated FmtB protein (fmtB)                                                 | 253 |
| SAUSA300_1289    | dihydrodipicolinate reductase (dapB) [1.3.1.26]                               | 254 |
| SAUSA300_2436    | putative cell wall surface anchor family protein                              | 255 |
| SAUSA300_0424.2  | psmA3                                                                         | 256 |
| SAUSA300_1884    | CamS sex pheromone cAM373 precursor                                           | 257 |
| SAUSA300_1532    | conserved hypothetical protein                                                | 258 |
|                  | succsuccinate dehydrogenase, cytochrome b-558 subunit (sdhC)                  | 259 |
| SAUSA300_1046    | (sdhC)                                                                        | 259 |
| SAUSA300_2109-s1 | truncated FmtB protein (fmtB)                                                 | 260 |
| SAUSA300_2462    | NAD(P)H-flavin oxidoreductase (frp) [1.6.99.-]                                | 261 |
| SAUSA300_1978    | ferric hydroxamate receptor                                                   | 262 |
|                  | iron compound ABC transporter, iron compound-binding protein                  | 263 |
| SAUSA300_2235    | protein                                                                       | 263 |
|                  | carbamoyl-phosphate synthase, large subunit (carB) [6.3.5.5]                  | 264 |
| SAUSA300_1096-s2 | [6.3.5.5]                                                                     | 264 |
| SAUSA300_0200    | peptide ABC transporter, ATP-binding protein                                  | 265 |
| SAUSA300_0213    | oxidoreductase, Gfo/Idh/MocA family                                           | 266 |
| SAUSA300_1702-s1 | cell wall surface anchor family protein                                       | 267 |
| SAUSA300_1043    | DNA mismatch repair MutS2 protein (mutS2)                                     | 268 |
| SAUSA300_2646    | tRNA modification GTPase (trmE)                                               | 269 |
| SAUSA300_0359    | trans-sulfuration enzyme family protein                                       | 270 |
| SAUSA300_1122    | fatty acid/phospholipid synthesis protein PlsX (plsX)                         | 271 |
| SAUSA300_2307    | ABC transporter, permease protein                                             | 272 |
| SAUSA300_2172    | 50S ribosomal protein L13 (rplM)                                              | 273 |
| SAUSA300_0775    | conserved hypothetical protein                                                | 274 |
| SAUSA300_0992    | putative lipoprotein                                                          | 275 |
| SAUSA300_1243-s1 | exonuclease SbcC (sbcC)                                                       | 276 |
| SAUSA300_1533    | conserved hypothetical protein                                                | 277 |
| SAUSA300_0223    | conserved hypothetical protein                                                | 278 |
| SAUSA300_2316    | acetyltransferase, GNAT family                                                | 279 |
|                  | alkaline phosphatase synthesis transcriptional regulatory protein PhoP (phoP) | 280 |
| SAUSA300_1639    | protein PhoP (phoP)                                                           | 280 |
| SAUSA300_2087    | putative peptidase                                                            | 281 |
|                  | DNA-directed RNA polymerase, beta subunit (rpoB) [2.7.7.6]                    | 282 |
| SAUSA300_0527-s2 | [2.7.7.6]                                                                     | 282 |
| SAUSA300_1889    | adenylosuccinate lyase (purB) [4.3.2.2]                                       | 283 |
| SAUSA300_1769    | leukotoxin LukE (lukE)                                                        | 284 |
| SAUSA300_0136    | cell wall surface anchor family protein                                       | 285 |
| SAUSA300_2540    | fructose-bisphosphate aldolase class-I [4.1.2.13]                             | 286 |
| SAUSA300_1143    | DNA topoisomerase I (topA) [5.99.1.2]                                         | 287 |
| SAUSA300_1942    | conserved hypothetical phage protein                                          | 288 |
| SAUSA300_1919    | conserved hypothetical protein                                                | 289 |
| SAUSA300_0724    | putative lipoprotein                                                          | 290 |
| SAUSA300_1014-s1 | pyruvate carboxylase (pyc) [6.4.1.1]                                          | 291 |
| SAUSA300_0982    | conserved hypothetical protein                                                | 292 |
| SAUSA300_0414    | staphylococcus tandem lipoprotein                                             | 293 |
| SAUSA300_1759    | conserved hypothetical protein                                                | 294 |
| SAUSA300_1449    | MutT/nudix family protein [3.6.1.13]                                          | 295 |
| SAUSA300_1622    | trigger factor (tig) [5.2.1.8]                                                | 296 |
|                  | acetyl-CoA carboxylase, biotin carboxyl carrier protein (accB)                | 297 |
| SAUSA300_1564    | (accB)                                                                        | 297 |
| SAUSA300_1687-s2 | FtsK/SpoIIIE family protein                                                   | 298 |
| SAUSA300_0463    | conserved hypothetical protein                                                | 299 |
| SAUSA300_2371    | biotin synthase (bioB) [2.8.1.6]                                              | 300 |
| SAUSA300_0244    | oxidoreductase, zinc-binding dehydrogenase family                             | 301 |

|                  |                                                           |     |
|------------------|-----------------------------------------------------------|-----|
| SAUSA300_1486    | conserved hypothetical protein                            | 302 |
| SAUSA300_1446    | conserved hypothetical protein                            | 303 |
| SAUSA300_2068    | conserved hypothetical protein                            | 304 |
|                  | capsular polysaccharide biosynthesis protein Cap5O        |     |
| SAUSA300_0166    | (cap5O) [1.1.1.233]                                       | 305 |
| SAUSA300_1928-s2 | phi77 ORF002-like protein, phage minor structural protein | 306 |
| SAUSA300_0599    | iron compound ABC transporter, permease protein           | 307 |
| SAUSA300_0535    | putative pyridoxal phosphate-dependent acyltransferase    | 308 |
| SAUSA300_2278    | urocanate hydratase (hutU) [4.2.1.49]                     | 309 |
| SAUSA300_1113    | protein kinase (pknB) [2.7.1.-]                           | 310 |
| SAUSA300_2589-s2 | LPXTG-motif cell wall surface anchor family protein       | 311 |
| SAUSA300_2578    | putative phage infection protein                          | 312 |
| SAUSA300_2561    | alkaline phosphatase (phoB) [3.1.3.1]                     | 313 |
| SAUSA300_0308    | ABC transporter, permease protein                         | 314 |
| SAUSA300_1729    | conserved hypothetical protein                            | 315 |
| SAUSA300_0411    | staphylococcus tandem lipoprotein                         | 316 |
| SAUSA300_1175    | conserved hypothetical protein                            | 317 |
| SAUSA300_0685    | fructose specific permease (fruA)                         | 318 |
| SAUSA300_1155    | putative membrane-associated zinc metalloprotease         | 319 |
| SAUSA300_1130    | signal recognition particle protein (ffh)                 | 320 |
| SAUSA300_1644    | pyruvate kinase (pyk) [2.7.1.40]                          | 321 |
| SAUSA300_0800    | staphylococcal enterotoxin K (sek)                        | 322 |
| SAUSA300_2249    | secretory antigen precursor SsaA (ssaA)                   | 323 |
| SAUSA300_1075    | penicillin-binding protein 1 (pbpA)                       | 324 |
| SAUSA300_1162    | translation initiation factor IF-2 (infB)                 | 325 |
| SAUSA300_0879    | isopropylmalate synthase-related protein                  | 326 |
| SAUSA300_0006    | DNA gyrase, A subunit (gyrA) [5.99.1.3]                   | 327 |
| SAUSA300_1702-s3 | cell wall surface anchor family protein                   | 328 |
| SAUSA300_1599    | ACT domain protein PheB                                   | 329 |
| SAUSA300_1157-s3 | DNA polymerase III, alpha subunit (polC) [2.7.7.7]        | 330 |
| SAUSA300_1401    | phiSLT ORF387-like protein, putative phage capsid protein | 331 |
| SAUSA300_0505    | conserved hypothetical protein                            | 332 |
| SAUSA300_0889    | oligopeptide ABC transporter, ATP-binding protein (oppD)  | 333 |
| SAUSA300_0580    | conserved hypothetical protein                            | 334 |
| SAUSA300_1367    | cytidylate kinase (cmk) [2.7.4.14]                        | 335 |
| SAUSA300_0870-s2 | exonuclease RexA (rexA)                                   | 336 |
| SAUSA300_1697    | Peptidase family M20/M25/M40 [3.4.-.-]                    | 337 |
| SAUSA300_2213-s1 | AcrB/AcrD/AcrF family protein                             | 338 |
| SAUSA300_0264    | ribose transporter RbsU                                   | 339 |
| SAUSA300_0677    | putative deoxyribodipyrimidine photolyase                 | 340 |
| SAUSA300_1149    | 30S ribosomal protein S2 (rpsB)                           | 341 |
| SAUSA300_1468    | DNA repair protein RecN (recN)                            | 342 |
| SAUSA300_0509    | ATP guanido phosphotransferase                            | 343 |
| SAUSA300_1713    | riboflavin biosynthesis protein (ribBA) [3.5.4.25]        | 344 |
| SAUSA300_0296    | conserved hypothetical protein                            | 345 |
| SAUSA300_1559    | putative enterotoxin type A                               | 346 |
| SAUSA300_0560    | acetyl-CoA c-acetyltransferase (vraB) [2.3.1.9]           | 347 |
| SAUSA300_0283-s3 | essC protein                                              | 348 |
| SAUSA300_1521    | RNA polymerase sigma factor RpoD (rpoD)                   | 349 |
| SAUSA300_1754    | serine protease SplE (splE) [3.4.21.19]                   | 350 |
| SAUSA300_0680    | multi drug resistance protein (norA)                      | 351 |
| SAUSA300_1012    | conserved hypothetical protein                            | 352 |
|                  | capsular polysaccharide biosynthesis protein Cap5P        |     |
| SAUSA300_0167    | (cap5P) [5.1.3.14]                                        | 353 |
| SAUSA300_1938    | phi77 ORF006-like protein, putative capsid protein        | 354 |
| SAUSA300_0344    | putative lipoprotein                                      | 355 |



|                  |                                                                        |     |
|------------------|------------------------------------------------------------------------|-----|
| SAUSA300_0283-s2 | essC protein                                                           | 356 |
| SAUSA300_2254    | similar to glycerate dehydrogenase                                     | 357 |
| SAUSA300_1796    | conserved hypothetical protein                                         | 358 |
| SAUSA300_0418    | staphylococcus tandem lipoprotein                                      | 359 |
| SAUSA300_2213    | AcrB/AcrD/AcrF family protein                                          | 360 |
| SAUSA300_0105    | peptidase, M20/M25/M40 family [3.5.1.14]                               | 361 |
| SAUSA300_1855    | monofunctional glycosyltransferase (sgtB) [3.4.-.-]                    | 362 |
| SAUSA300_1674    | putative serine protease HtrA                                          | 363 |
| SAUSA300_1272    | conserved hypothetical protein                                         | 364 |
| SAUSA300_1257    | peptide methionine sulfoxide reductase regulator MsrR (msrR)           | 365 |
| SAUSA300_1285    | ABC transporter, ATP-binding protein                                   | 366 |
| SAUSA300_0415    | staphylococcus tandem lipoprotein (lpl3)                               | 367 |
| SAUSA300_2141    | putative transposase, degenerate                                       | 368 |
| SAUSA300_1286    | aspartate kinase [2.7.2.4]                                             | 369 |
| SAUSA300_1741    | putative lipoprotein                                                   | 370 |
| SAUSA300_0348    | twin-arginine translocation protein, TatA/E family                     | 371 |
| SAUSA300_0203    | putative lipoprotein                                                   | 372 |
| SAUSA300_0274    | conserved hypothetical protein                                         | 373 |
| SAUSA300_2503    | secretory antigen precursor SsaA                                       | 374 |
| SAUSA300_0065    | arginine deiminase (arcA) [3.5.3.6]                                    | 375 |
| SAUSA300_1893    | NH(3)-dependent NAD <sup>+</sup> synthetase (nadE) [6.3.1.5]           | 376 |
| SAUSA300_1605    | rod shape-determining protein MreC (mreC)                              | 377 |
| SAUSA300_1682    | catabolite control protein A (ccpA)                                    | 378 |
| SAUSA300_1344    | putative DNA replication protein DnaD                                  | 379 |
| SAUSA300_1864    | putative membrane protein                                              | 380 |
| SAUSA300_1475    | acetyl-CoA carboxylase, biotin carboxylase (accC) [6.4.1.2]            | 381 |
| SAUSA300_1138    | succinyl-CoA synthetase, beta subunit (sucC) [6.2.1.5]                 | 382 |
| SAUSA300_2302    | teicoplanin resistance associated membrane protein TcaA protein (tcaA) | 383 |
| SAUSA300_1347    | BirA bifunctional protein (birA) [6.3.4.15]                            | 384 |
| SAUSA300_2023    | anti-sigma-B factor, serine-protein kinase (rsbW) [2.7.1.37]           | 385 |
| SAUSA300_2148    | conserved hypothetical protein                                         | 386 |
| SAUSA300_0864    | argininosuccinate synthase (argG) [6.3.4.5]                            | 387 |
| SAUSA300_1127-s2 | chromosome segregation protein SMC (smc)                               | 388 |
| SAUSA300_1078    | cell division protein (divIB)                                          | 389 |
| SAUSA300_0866    | conserved hypothetical protein                                         | 390 |
| SAUSA300_1480    | putative traG membrane protein                                         | 391 |
| pUSA03_0016      | transfer complex protein TraG (traG)                                   | 392 |
| SAUSA300_1127-s1 | chromosome segregation protein SMC (smc)                               | 393 |
| pUSA03_0027      | conserved hypothetical protein                                         | 394 |
| SAUSA300_1243    | exonuclease SbcC (sbcC)                                                | 395 |
| SAUSA300_1702-s4 | cell wall surface anchor family protein                                | 396 |
| SAUSA300_0861    | NAD-specific glutamate dehydrogenase (gudB) [1.4.1.2]                  | 397 |
| SAUSA300_0870-s1 | exonuclease RexA (rexA)                                                | 398 |
| SAUSA300_1350    | conserved hypothetical protein                                         | 399 |
| SAUSA300_0716    | ribonucleoside-diphosphate reductase, alpha subunit [1.17.4.1]         | 400 |
| SAUSA300_1680    | acetoin utilization protein AcuA (acuA) [2.3.1.-]                      | 401 |
| SAUSA300_0905    | putative adenylate cyclase                                             | 402 |
| SAUSA300_0793    | conserved hypothetical protein                                         | 403 |
| SAUSA300_1903    | conserved hypothetical protein                                         | 404 |
| SAUSA300_1503    | putative competence protein ComGB                                      | 405 |
| SAUSA300_1217    | ABC transporter, ATP-binding protein                                   | 406 |
| SAUSA300_0032    | penicillin-binding protein 2 (mecA) [3.4.16.4]                         | 407 |

|                  |                                                             |     |
|------------------|-------------------------------------------------------------|-----|
| SAUSA300_0893    | oligopeptide ABC transporter, ATP-binding protein (oppF)    | 408 |
| pUSA03_0033      | conserved hypothetical protein                              | 409 |
| SAUSA300_0947    | hydrolase, alpha/beta hydrolase fold family [3.4.11.5]      | 410 |
| SAUSA300_0258    | transcriptional regulator, GntR family                      | 411 |
| SAUSA300_2332    | heat shock protein                                          | 412 |
|                  | 3-oxoacyl-(acyl-carrier-protein) reductase (fabG)           |     |
| SAUSA300_1124    | [1.1.1.100]                                                 | 413 |
| SAUSA300_2076    | aldehyde dehydrogenase family protein                       | 414 |
| SAUSA300_1940    | phage portal protein                                        | 415 |
| SAUSA300_2114    | arginase (rocF) [3.5.3.1]                                   | 416 |
| SAUSA300_0801    | staphylococcal enterotoxin Q (seq)                          | 417 |
| SAUSA300_1495    | conserved hypothetical protein                              | 418 |
| SAUSA300_1119    | conserved hypothetical protein                              | 419 |
| SAUSA300_1172    | peptidase, M16 family [3.4.24.56]                           | 420 |
| SAUSA300_0028    | putative transposase                                        | 421 |
| SAUSA300_2574    | conserved hypothetical protein                              | 422 |
| SAUSA300_2315    | putative lipoprotein                                        | 423 |
| SAUSA300_1327-s2 | cell surface protein                                        | 424 |
| SAUSA300_1574    | conserved hypothetical protein                              | 425 |
|                  | phiSLT ORF2067-like protein, phage tail tape measure        |     |
| SAUSA300_1393-s3 | protein                                                     | 426 |
| SAUSA300_1415    | phiSLT ORF 77-like protein                                  | 427 |
| SAUSA300_2153    | tagatose-6-phosphate kinase (lacC) [2.7.1.144]              | 428 |
| SAUSA300_0336    | conserved hypothetical protein                              | 429 |
| SAUSA300_2504    | acyltransferase                                             | 430 |
| pUSA03_0031      | LtrC-like protein                                           | 431 |
| SAUSA300_2623    | pyrrolidone-carboxylate peptidase (pcp) [3.4.19.3]          | 432 |
| SAUSA300_0141    | phosphopentomutase (deoB) [5.4.2.7]                         | 433 |
| SAUSA300_1290    | tetrahydrodipicolinate acetyltransferase (dapD) [2.3.1.117] | 434 |
| SAUSA300_0237    | inosine-uridine preferring nucleoside hydrolase             | 435 |
| SAUSA300_2427    | conserved hypothetical protein, authentic frameshift        | 436 |
| SAUSA300_0023    | Yycl protein                                                | 437 |
| SAUSA300_1187    | conserved hypothetical protein                              | 438 |
| SAUSA300_1396    | phiSLT ORF151-like protein, major tail protein              | 439 |
| SAUSA300_2486    | putative ATP-dependent Clp proteinase                       | 440 |
| SAUSA300_1026    | conserved hypothetical protein                              | 441 |
| SAUSA300_0552    | conserved hypothetical protein                              | 442 |
| SAUSA300_0413    | staphylococcus tandem lipoprotein                           | 443 |
| SAUSA300_1158    | conserved hypothetical protein                              | 444 |
| SAUSA300_0003    | conserved hypothetical protein                              | 445 |
|                  | 2,3-bisphosphoglycerate-independent phosphoglycerate        |     |
| SAUSA300_0759    | mutase (gpmI) [5.4.2.1]                                     | 446 |
| SAUSA300_1413    | conserved hypothetical phage protein                        | 447 |
|                  | DNA-directed RNA polymerase alpha subunit (rpoA)            |     |
| SAUSA300_2178    | [2.7.7.6]                                                   | 448 |
| SAUSA300_0170    | aldehyde dehydrogenase [1.2.1.3]                            | 449 |
| SAUSA300_0634    | ferrichrome transport permease protein fhuB (fhuB)          | 450 |
| SAUSA300_1725    | transaldolase [2.2.1.2]                                     | 451 |
| SAUSA300_2566    | transcriptional regulator, Crp/Fnr family (arcR)            | 452 |
|                  | UDP-N-acetylglucosamine pyrophosphorylase (glmU)            |     |
| SAUSA300_0477    | [2.7.7.23]                                                  | 453 |
|                  | 3-oxoacyl-(acyl-carrier-protein) synthase III (fabH)        |     |
| SAUSA300_0885    | [2.3.1.41]                                                  | 454 |
| SAUSA300_2554    | sulfite reductase flavoprotein [1.8.1.2]                    | 455 |
| SAUSA300_0562    | phosphomethylpyrimidine kinase (thiD) [2.7.4.7]             | 456 |

|                  |                                                           |     |
|------------------|-----------------------------------------------------------|-----|
|                  | succinate dehydrogenase, iron-sulfur protein (sdhB)       |     |
| SAUSA300_1048    | [1.3.99.1]                                                | 457 |
| SAUSA300_0821    | SUF system FeS assembly protein, NifU family              | 458 |
| SAUSA300_0846    | Na <sup>+</sup> /H <sup>+</sup> antiporter family protein | 459 |
| SAUSA300_0235    | L-lactate dehydrogenase [1.1.1.27]                        | 460 |
|                  | pyruvate dehydrogenase E1 component, alpha subunit        |     |
| SAUSA300_0993    | (pdhA) [1.2.4.1]                                          | 461 |
| SAUSA300_0869-s2 | exonuclease RxB (rxB)                                     | 462 |
| SAUSA300_1540    | chaperone protein DnaK (dnaK)                             | 463 |
| SAUSA300_2387    | NAD dependent epimerase/dehydratase family protein        | 464 |
| SAUSA300_1157-s1 | DNA polymerase III, alpha subunit (polC) [2.7.7.7]        | 465 |
| SAUSA300_2089    | pyrimidine nucleoside phosphorylase (pdp) [2.4.2.2]       | 466 |
| SAUSA300_0262    | ribokinase (rbsK) [2.7.1.15]                              | 467 |
| SAUSA300_2100    | lytic regulatory protein                                  | 468 |
|                  | amino acid ABC transporter, permease/substrate-binding    |     |
| SAUSA300_1808    | protein                                                   | 469 |
| SAUSA300_2297    | conserved hypothetical protein                            | 470 |
| SAUSA300_1976    | probable succinyl-diaminopimelate desuccinylase           | 471 |
| SAUSA300_1611    | valyl-tRNA synthetase (valS) [6.1.1.9]                    | 472 |
| SAUSA300_2455    | putative fructose-1,6-bisphosphatase                      | 473 |
| SAUSA300_2112    | conserved hypothetical protein                            | 474 |
| SAUSA300_0031    | conserved hypothetical protein                            | 475 |
| SAUSA300_1696    | D-alanine aminotransferase (dat) [2.6.1.21]               | 476 |
| SAUSA300_0743    | HPr(Ser) kinase/phosphatase (hprK) [2.7.1.-]              | 477 |
| SAUSA300_2341    | respiratory nitrate reductase, delta subunit (narJ)       | 478 |
| SAUSA300_2634    | ABC transporter, permease protein                         | 479 |
| SAUSA300_1770    | conserved hypothetical protein                            | 480 |
| SAUSA300_0547-s3 | sdrD protein (sdrD)                                       | 481 |
| SAUSA300_0021    | sensory box histidine kinase [2.7.3.-]                    | 482 |
| SAUSA300_2420    | conserved hypothetical protein                            | 483 |
| SAUSA300_2478    | Holin-like protein cidB (cidB)                            | 484 |
| SAUSA300_2086    | conserved hypothetical protein                            | 485 |
| SAUSA300_1418    | phiSLT ORF 82-like protein                                | 486 |
| SAUSA300_2498    | squalene synthase (crtN) [1.3.-.-]                        | 487 |
| SAUSA300_2458    | glyoxylase family protein                                 | 488 |
| SAUSA300_1575    | alanyl-tRNA synthetase (alaS) [6.1.1.7]                   | 489 |
| SAUSA300_2374    | ABC transporter, ATP-binding/permease protein             | 490 |
|                  | glutamate-1-semialdehyde-2,1-aminomutase (hemL)           |     |
| SAUSA300_1845    | [5.4.3.8]                                                 | 491 |
| SAUSA300_2354    | putative lipoprotein                                      | 492 |
| SAUSA300_1624    | MutT/nudix family protein                                 | 493 |
| SAUSA300_2377    | glycerate kinase [2.7.1.31]                               | 494 |
| SAUSA300_1150    | translation elongation factor Ts (tsf)                    | 495 |
| SAUSA300_0377    | putative lipoprotein                                      | 496 |
| SAUSA300_1888    | conserved hypothetical protein                            | 497 |
| SAUSA300_0372    | putative lipoprotein                                      | 498 |
| SAUSA300_0485    | cell-division initiation protein                          | 499 |
|                  | spermidine/putrescine ABC transporter,                    |     |
| SAUSA300_1002    | spermidine/putrescine-binding protein (potD)              | 500 |
| SAUSA300_1007    | inositol monophosphatase family protein [3.1.3.25]        | 501 |
| SAUSA300_1087    | isoleucyl-tRNA synthetase (ileS) [6.1.1.5]                | 502 |
| SAUSA300_1034    | sortase B (srtB)                                          | 503 |
| SAUSA300_0869-s1 | exonuclease RxB (rxB)                                     | 504 |
| SAUSA300_1089    | lipoprotein signal peptidase (lspA) [3.4.23.36]           | 505 |
| SAUSA300_2358    | ABC transporter, permease protein                         | 506 |
| SAUSA300_0763    | carboxylesterase (est) [3.1.1.1]                          | 507 |

|                  |                                                                                                                         |     |
|------------------|-------------------------------------------------------------------------------------------------------------------------|-----|
| SAUSA300_0445-s2 | glutamate synthase, large subunit (gltB) [1.4.1.13]                                                                     | 508 |
| SAUSA300_2400    | glutamyl-aminopeptidase                                                                                                 | 509 |
| SAUSA300_2424    | putative staphylococcus tandem lipoprotein                                                                              | 510 |
| SAUSA300_1219    | putative sensor histidine kinase                                                                                        | 511 |
| pUSA01_0004      | hypothetical protein                                                                                                    | 512 |
| SAUSA300_0570    | phosphate acetyltransferase (pta) [2.3.1.8]                                                                             | 513 |
| SAUSA300_2060    | ATP synthase F1, alpha subunit (atpA) [3.6.3.14]                                                                        | 514 |
| SAUSA300_0642    | conserved hypothetical protein                                                                                          | 515 |
| SAUSA300_1106    | putative lipoprotein                                                                                                    | 516 |
| SAUSA300_1270    | methicillin resistance protein FemB (femB)                                                                              | 517 |
| SAUSA300_2484    | hydroxymethylglutaryl-CoA synthase [2.3.3.10]                                                                           | 518 |
| SAUSA300_0230    | putative membrane protein                                                                                               | 519 |
| SAUSA300_1398    | phiSLT ORF123-like protein                                                                                              | 520 |
| SAUSA300_1960    | putative phage-related DNA recombination protein                                                                        | 521 |
| SAUSA300_0645    | DNA-binding response regulator                                                                                          | 522 |
| SAUSA300_0600    | hydrolase, haloacid dehalogenase-like family                                                                            | 523 |
| SAUSA300_0536    | DJ-1/Pfpl family protein                                                                                                | 524 |
| SAUSA300_0853    | Na(+)/H(+) antiporter subunit C (mnhC)                                                                                  | 525 |
| SAUSA300_0030    | putative glycerophosphoryl diester phosphodiesterase                                                                    | 526 |
| SAUSA300_2370    | putative 8-amino-7-oxononanoate synthase                                                                                | 527 |
| SAUSA300_0754    | conserved hypothetical protein                                                                                          | 528 |
| SAUSA300_2343-s1 | respiratory nitrate reductase, alpha subunit [1.7.99.4]                                                                 | 529 |
| SAUSA300_1378    | conserved hypothetical protein                                                                                          | 530 |
| SAUSA300_2248    | transcriptional regulator, AraC family                                                                                  | 531 |
| SAUSA300_0212    | oxidoreductase, Gfo/Idh/MocA family                                                                                     | 532 |
| SAUSA300_0999    | spermidine/putrescine ABC transporter, ATP-binding protein (potA)                                                       | 533 |
| SAUSA300_1881    | Aspartyl/glutamyl-tRNA amidotransferase subunit A (gatA) [6.3.5.-]                                                      | 534 |
| SAUSA300_2301    | teicoplanin resistance associated membrane protein TcaB protein (tcaB)                                                  | 535 |
| SAUSA300_2109    | truncated FmtB protein (fmtB)                                                                                           | 536 |
| SAUSA300_2069    | conserved hypothetical protein                                                                                          | 537 |
| SAUSA300_0633    | ferrichrome transport ATP-binding protein fhuA (fhuA)                                                                   | 538 |
| SAUSA300_1426    | conserved hypothetical phage protein                                                                                    | 539 |
| SAUSA300_1631    | replication initiation and membrane attachment protein                                                                  | 540 |
| SAUSA300_2411    | oligopeptide permease, peptide-binding protein (opp-1A) succinate dehydrogenase, flavoprotein subunit (sdhA) [1.3.99.1] | 542 |
| SAUSA300_1047    | putative cobalamin synthesis protein                                                                                    | 543 |
| SAUSA300_0424    | staphylococcus tandem lipoprotein                                                                                       | 544 |
| SAUSA300_2429    | non-ribosomal peptide synthetase                                                                                        | 545 |
| SAUSA300_0181-s4 | ABC transporter, ATP-binding protein                                                                                    | 546 |
| SAUSA300_1911    | oligopeptide ABC transporter, permease protein (oppC)                                                                   | 547 |
| SAUSA300_0888    | transporter gate domain protein                                                                                         | 548 |
| SAUSA300_2520    | citrate synthase II (gltA) [4.1.3.7]                                                                                    | 549 |
| SAUSA300_1641    | urease accessory protein UreD (ureD) [3.5.1.5]                                                                          | 550 |
| SAUSA300_2244    | sensor histidine kinase, KdpD (kdpD) [2.7.3.-]                                                                          | 551 |
| SAUSA300_2035    | isocitrate dehydrogenase, NADP-dependent (icd) [1.1.1.42]                                                               | 552 |
| SAUSA300_1640    | protoporphyrinogen oxidase (hemG) [1.3.3.4]                                                                             | 553 |
| SAUSA300_1781    | dihydropteroate synthase (folP) [2.5.1.15]                                                                              | 554 |
| SAUSA300_0492    | formate-tetrahydrofolate ligase (fhs) [6.3.4.3]                                                                         | 555 |
| SAUSA300_1678    | conserved hypothetical protein                                                                                          | 556 |
| SAUSA300_1483    | oligopeptide ABC transporter, oligopeptide-binding protein (oppA)                                                       | 557 |
| SAUSA300_0892    |                                                                                                                         |     |

|                   |                                                                                                                                 |     |
|-------------------|---------------------------------------------------------------------------------------------------------------------------------|-----|
| SAUSA300_1147     | heat shock protein HslVU, ATPase subunit HslU (hslU)                                                                            | 558 |
| SAUSA300_1098     | orotate phosphoribosyltransferase (pyrE) [2.4.2.10]                                                                             | 559 |
| SAUSA300_1111     | conserved hypothetical protein                                                                                                  | 560 |
| SAUSA300_0935     | conserved hypothetical protein                                                                                                  | 561 |
| SAUSA300_2598     | capsular polysaccharide biosynthesis protein Cap1A (cap1A)                                                                      | 562 |
| SAUSA300_1246     | aconitate hydratase (acnA) [4.2.1.3]                                                                                            | 563 |
| SAUSA300_1704     | leucyl-tRNA synthetase (leuS) [6.1.1.4]                                                                                         | 564 |
| SAUSA300_1705     | putative drug transporter                                                                                                       | 565 |
| SAUSA300_1301     | conserved hypothetical protein                                                                                                  | 566 |
| SAUSA300_0179     | putative D-isomer specific 2-hydroxyacid dehydrogenase                                                                          | 567 |
| SAUSA300_2329     | proton/sodium-glutamate symport protein (gltT)                                                                                  | 568 |
| SAUSA300_1327-s15 | cell surface protein                                                                                                            | 569 |
| SAUSA300_1227     | threonine synthase (thrC) [4.2.3.1]                                                                                             | 570 |
| SAUSA300_1171     | conserved hypothetical protein                                                                                                  | 571 |
| SAUSA300_1307     | sensor histidine kinase protein (arlS) [2.7.3.-]<br>DNA-directed RNA polymerase, beta subunit (rpoB)                            | 572 |
| SAUSA300_0527-s1  | [2.7.7.6]                                                                                                                       | 573 |
| SAUSA300_0758     | triosephosphate isomerase (tpiA) [5.3.1.1]                                                                                      | 574 |
| SAUSA300_0844     | conserved hypothetical protein                                                                                                  | 575 |
| SAUSA300_0871     | conserved hypothetical protein                                                                                                  | 576 |
| SAUSA300_2483     | hydroxymethylglutaryl-CoA reductase [1.1.1.88]                                                                                  | 577 |
| SAUSA300_0002     | DNA polymerase III, beta subunit (dnaN) [2.7.7.7]                                                                               | 578 |
| SAUSA300_2419     | conserved hypothetical protein                                                                                                  | 579 |
| SAUSA300_1014     | pyruvate carboxylase (pyc) [6.4.1.1]                                                                                            | 580 |
| SAUSA300_0475     | SpoVG protein                                                                                                                   | 581 |
| SAUSA300_2149     | 6-phospho-beta-galactosidase (lacG) [3.2.1.85]                                                                                  | 582 |
| SAUSA300_1891     | conserved hypothetical protein                                                                                                  | 583 |
| SAUSA300_1698     | conserved hypothetical protein                                                                                                  | 584 |
| SAUSA300_0375     | putative phosphoglycerate mutase family protein<br>L-serine dehydratase, iron-sulfur-dependent, beta subunit (sdaAB) [4.3.1.17] | 585 |
| SAUSA300_2470     | ATP-binding protein, Mrp/Nbp35 family                                                                                           | 586 |
| SAUSA300_2125     | conserved hypothetical protein                                                                                                  | 587 |
| SAUSA300_0462     | conserved hypothetical protein                                                                                                  | 588 |
| SAUSA300_1689     | conserved hypothetical protein                                                                                                  | 589 |
| SAUSA300_1168     | RNA-metabolising metallo-beta-lactamase                                                                                         | 590 |
| SAUSA300_1011     | conserved hypothetical protein                                                                                                  | 591 |
| SAUSA300_1494     | conserved hypothetical protein                                                                                                  | 592 |
| SAUSA300_1807     | amino acid ABC transporter, ATP-binding protein                                                                                 | 593 |
| SAUSA300_1090     | conserved hypothetical protein<br>6-phosphogluconate dehydrogenase, decarboxylating (gnd) [1.1.1.44]                            | 594 |
| SAUSA300_1459     | transfer complex protein TraM (traM)                                                                                            | 595 |
| pUSA03_0022       | perfringolysin O regulator protein                                                                                              | 596 |
| SAUSA300_2471     | conserved hypothetical protein                                                                                                  | 597 |
| SAUSA300_0192     | conserved hypothetical protein                                                                                                  | 598 |
| SAUSA300_1169     | DNA translocase FtsK (ftsK)                                                                                                     | 599 |
| SAUSA300_1245     | glycine betaine transporter opuD (opuD)                                                                                         | 600 |
| SAUSA300_2113     | conserved hypothetical protein                                                                                                  | 601 |
| SAUSA300_1712     | riboflavin synthase, beta subunit (ribH) [6.3.3.-]                                                                              | 602 |
| SAUSA300_1600     | GTP-binding protein Obg/CgtA                                                                                                    | 603 |
| SAUSA300_2398     | putative membrane protein                                                                                                       | 604 |
| SAUSA300_1153     | undecaprenyl diphosphate synthase (upps) [2.5.1.31]                                                                             | 605 |
| SAUSA300_0204     | gamma-glutamyltranspeptidase (ggt) [2.3.2.2]                                                                                    | 606 |
| SAUSA300_0934     | membrane protein                                                                                                                | 607 |
| SAUSA300_1766     | lantibiotic epidermin biosynthesis protein EpiB (epiB)                                                                          | 608 |
| SAUSA300_1199     | putative aluminium resistance protein                                                                                           | 609 |

|                   |                                                                                                                             |     |
|-------------------|-----------------------------------------------------------------------------------------------------------------------------|-----|
| SAUSA300_2208     | DNA topoisomerase III (topB) [5.99.1.2]<br>2-oxoisovalerate dehydrogenase, E3 component,                                    | 610 |
| SAUSA300_1467     | lipoamide dehydrogenase (lpdA) [1.8.1.4]                                                                                    | 611 |
| SAUSA300_0194     | sucrose-specific PTS transporter protein<br>UDP-N-acetylenolpyruvoylglucosamine reductase (murB)<br>[1.1.1.158]             | 612 |
| SAUSA300_0722     | fmt protein (fmt) [3.5.2.6]                                                                                                 | 613 |
| SAUSA300_0959     | chaperone protein DnaJ (dnaJ)                                                                                               | 614 |
| SAUSA300_1539     | aminopeptidase PepS (pepS) [3.4.11.-]                                                                                       | 615 |
| SAUSA300_1860     | degV family protein                                                                                                         | 616 |
| SAUSA300_1327-s3  | cell surface protein                                                                                                        | 617 |
| SAUSA300_1327-s14 | cell surface protein                                                                                                        | 618 |
| SAUSA300_1327-s7  | cell surface protein                                                                                                        | 619 |
| SAUSA300_1327-s9  | cell surface protein                                                                                                        | 620 |
| SAUSA300_0733     | N-acetylglucosamine-6-phosphate deacetylase (nagA)<br>[3.5.1.25]                                                            | 621 |
| SAUSA300_0686     | cell surface protein                                                                                                        | 622 |
| SAUSA300_1327-s4  | cell surface protein                                                                                                        | 623 |
| SAUSA300_1067     | antibacterial protein                                                                                                       | 624 |
| SAUSA300_1411     | phiSLT ORF66-like protein                                                                                                   | 625 |
| SAUSA300_1082     | conserved hypothetical protein                                                                                              | 626 |
| SAUSA300_1619     | glutamyl-tRNA reductase (hemA) [1.2.1.-]                                                                                    | 627 |
| SAUSA300_1327-s12 | cell surface protein                                                                                                        | 628 |
| SAUSA300_2449     | putative transporter                                                                                                        | 629 |
| SAUSA300_1327-s8  | cell surface protein                                                                                                        | 630 |
| SAUSA300_0416     | staphylococcus tandem lipoprotein                                                                                           | 631 |
| SAUSA300_1390     | phiSLT ORF96-like protein<br>DNA-directed RNA polymerase, beta subunit (rpoC)                                               | 632 |
| SAUSA300_0528-s2  | [2.7.7.6]                                                                                                                   | 633 |
| SAUSA300_1794     | conserved hypothetical protein<br>UDP-N-acetylglucosamine 1-carboxyvinyltransferase<br>(murA) [2.5.1.7]                     | 634 |
| SAUSA300_2078     | cell surface protein                                                                                                        | 635 |
| SAUSA300_1327-s13 | cell surface protein                                                                                                        | 636 |
| SAUSA300_1327-s6  | cell surface protein                                                                                                        | 637 |
| SAUSA300_1928-s1  | phi77 ORF002-like protein, phage minor structural protein<br>DNA polymerase III, gamma and tau subunits (dnaX)<br>[2.7.7.7] | 638 |
| SAUSA300_0452     | cell surface protein                                                                                                        | 639 |
| SAUSA300_0948     | naphthoate synthase (menB) [4.1.3.36]                                                                                       | 640 |
| SAUSA300_0205     | staphylococcus tandem lipoprotein                                                                                           | 641 |
| SAUSA300_0963     | quinol oxidase, subunit II (qoxA) [1.9.3.-]                                                                                 | 642 |
| SAUSA300_2343-s2  | respiratory nitrate reductase, alpha subunit [1.7.99.4]                                                                     | 643 |
| SAUSA300_1327-s5  | cell surface protein                                                                                                        | 644 |
| pUSA03_0014       | transfer complex protein TraE (traE)                                                                                        | 645 |
| SAUSA300_1327-s10 | cell surface protein                                                                                                        | 646 |
| SAUSA300_1842     | transcriptional regulator, Fur family                                                                                       | 647 |
| SAUSA300_2475     | conserved hypothetical protein                                                                                              | 648 |
| SAUSA300_0690     | sensor histidine kinase SaeS (saeS) [2.7.3.-]                                                                               | 649 |
| SAUSA300_0417     | staphylococcus tandem lipoprotein<br>UDP-N-acetylmuramoylalanine--D-glutamate ligase (murD)<br>[6.3.2.9]                    | 650 |
| SAUSA300_1077     | phosphoribosylformylglycinamide cyclo-ligase (purM)<br>[6.3.3.1]                                                            | 651 |
| SAUSA300_0973     | cell surface protein                                                                                                        | 652 |
| SAUSA300_0511     | DNA repair protein RadA (radA)<br>PTS system, mannitol specific IIBC component (mtlF)                                       | 653 |
| SAUSA300_2105     | [2.7.1.69]                                                                                                                  | 654 |
| SAUSA300_1327-s11 | cell surface protein                                                                                                        | 655 |
| SAUSA300_2589-s3  | LPXTG-motif cell wall surface anchor family protein                                                                         | 656 |

|                  |                                                            |     |
|------------------|------------------------------------------------------------|-----|
|                  | anaerobic ribonucleotide reductase, small subunit (nrdG)   |     |
| SAUSA300_2550    | [1.97.1.4]                                                 | 657 |
| SAUSA300_1006    | conserved hypothetical protein                             | 658 |
|                  | capsular polysaccharide biosynthesis protein Cap5A         |     |
| SAUSA300_0152    | (cap5A)                                                    | 659 |
| SAUSA300_1866    | two-component sensor histidine kinase (vraS) [2.7.3.-]     | 660 |
| SAUSA300_2224    | molybdopterin biosynthesis protein A (moeA)                | 661 |
|                  | ribosomal-protein-alanine acetyltransferase (rimI)         |     |
| SAUSA300_2003    | [2.3.1.128]                                                | 662 |
| SAUSA300_2567    | carbamate kinase (arcC) [2.7.2.2]                          | 663 |
| SAUSA300_1385    | phiSLT ORF 99-like protein                                 | 664 |
| SAUSA300_0707    | osmoprotectant ABC transporter, permease [3.6.3.32]        | 665 |
| SAUSA300_1910    | putative membrane protein                                  | 666 |
| SAUSA300_0445-s1 | glutamate synthase, large subunit (gltB) [1.4.1.13]        | 667 |
| SAUSA300_1139    | succinyl-CoA synthetase, alpha subunit (sucD) [6.2.1.5]    | 668 |
|                  | phosphoribosylformylglycinamide synthase I (purQ)          |     |
| SAUSA300_0970    | [6.3.5.3]                                                  | 669 |
| SAUSA300_0056    | conserved hypothetical protein                             | 670 |
| SAUSA300_1739    | conserved hypothetical protein                             | 671 |
| SAUSA300_1376    | putative lipoprotein                                       | 672 |
| SAUSA300_1181    | conserved hypothetical protein                             | 673 |
| SAUSA300_1569    | peptidase, U32 family [3.4.-.-]                            | 674 |
| SAUSA300_0479    | ribosomal protein L25, Ctc-form                            | 675 |
| SAUSA300_0449    | alpha,alpha-phosphotrehalase (treC) [3.2.1.93]             | 676 |
| SAUSA300_0858    | conserved hypothetical protein                             | 677 |
| SAUSA300_2214    | FmhB protein                                               | 678 |
| SAUSA300_0424.1  | psmA4                                                      | 679 |
| SAUSA300_0771    | acetyltransferase, GNAT family [2.3.1.-]                   | 680 |
|                  | ribonucleoside-diphosphate reductase, beta subunit         |     |
| SAUSA300_0717    | [1.17.4.1]                                                 | 681 |
| SAUSA300_0045    | HNH endonuclease family protein                            | 682 |
| SAUSA300_2477    | pyruvate oxidase (cidC) [1.2.3.3]                          | 683 |
|                  | ribosomal large subunit pseudouridine synthase B, RluB     |     |
| SAUSA300_1443    | (rluB) [4.2.1.70]                                          | 684 |
| SAUSA300_1947    | phi77 ORF031-like protein                                  | 685 |
| SAUSA300_1460    | peptidase, M20/M25/M40 family                              | 686 |
| SAUSA300_0794    | Toprim domain protein                                      | 687 |
| SAUSA300_2515    | transcriptional regulator, TetR family                     | 688 |
| SAUSA300_0541    | deoxynucleoside kinase family protein [2.7.1.145 2.7.1.-]  | 689 |
| SAUSA300_1439    | conserved hypothetical protein, authentic frameshift       | 690 |
|                  | S-adenosylmethionine:tRNA ribosyltransferase-isomerase     |     |
| SAUSA300_1596    | (queA) [5.-.-.-]                                           | 691 |
| pUSA03_0028      | resolvase                                                  | 692 |
| SAUSA300_1452    | pyrroline-5-carboxylate reductase (proC) [1.5.1.2]         | 693 |
| SAUSA300_1284    | conserved hypothetical protein                             | 694 |
| SAUSA300_0318    | N-acetylmannosamine-6-phosphate 2-epimerase [5.1.3.9]      | 695 |
| SAUSA300_1906    | conserved hypothetical protein                             | 696 |
| SAUSA300_1562    | LamB/YcsF family protein                                   | 697 |
| SAUSA300_0303    | putative lipoprotein                                       | 698 |
| SAUSA300_1287    | aspartate semialdehyde dehydrogenase (asd) [1.2.1.11]      | 699 |
| SAUSA300_0231    | ABC transporter, substrate-binding protein                 | 700 |
| SAUSA300_0540    | HAD-superfamily hydrolase, subfamily IA, variant 1         | 701 |
| SAUSA300_1946    | phiPVL ORF057-like protein, transcriptional activator RinB | 702 |
| SAUSA300_1192    | glycerol kinase (glpK) [2.7.1.30]                          | 703 |
| SAUSA300_2541    | malate:quinone-oxidoreductase (mqo) [1.1.99.16]            | 704 |
| SAUSA300_2010    | 2-isopropylmalate synthase (leuA) [2.3.3.13]               | 705 |

|                  |                                                           |     |
|------------------|-----------------------------------------------------------|-----|
| SAUSA300_1544    | GTP-binding protein LepA (lepA)                           | 706 |
|                  | phosphotransferase system, fructose-specific IIBC         |     |
| SAUSA300_2576    | component [2.7.1.69]                                      | 707 |
| SAUSA300_0663    | putative lipoprotein                                      | 708 |
|                  | undecaprenyldiphospho-muramoylpentapeptide beta-N-        |     |
| SAUSA300_1311    | acetylglucosaminyltransferase (murG) [2.4.1.227]          | 709 |
|                  | UTP-glucose-1-phosphate uridylyltransferase (galU)        |     |
| SAUSA300_2439    | [2.7.7.9]                                                 | 710 |
| SAUSA300_2589-s4 | LPXTG-motif cell wall surface anchor family protein       | 711 |
| SAUSA300_0681    | conserved hypothetical protein                            | 712 |
| SAUSA300_0867    | signal peptidase IA (lepB) [3.4.21.89]                    | 713 |
| SAUSA300_0168    | conserved hypothetical protein                            | 714 |
| SAUSA300_0243    | conserved hypothetical protein                            | 715 |
| SAUSA300_1471    | exodeoxyribonuclease VII, small subunit (xseB) [3.1.11.6] | 716 |
| SAUSA300_1695    | conserved hypothetical protein                            | 717 |
| SAUSA300_1630    | primosomal protein DnaI (dnaI)                            | 718 |
| SAUSA300_2085    | conserved hypothetical protein                            | 719 |
| SAUSA300_2467    | sortase (srtA)                                            | 720 |
| SAUSA300_2529    | conserved hypothetical protein                            | 721 |
| SAUSA300_2430    | staphylococcus tandem lipoprotein                         | 722 |
| SAUSA300_2536    | alpha-acetolactate decarboxylase (budA) [4.1.1.5]         | 723 |
| SAUSA300_0208    | putative maltose ABC transporter, ATP-binding protein     | 724 |
| SAUSA300_0828    | 5-nucleotidase family protein                             | 725 |
| SAUSA300_1402    | phiSLT ORF257-like protein, putative prophage protease    | 726 |
| SAUSA300_1951    | phiPVL ORF052-like protein                                | 727 |
| SAUSA300_1204    | conserved hypothetical protein                            | 728 |
| SAUSA300_2489    | similar to antibiotic transport-associated protein        | 729 |
| SAUSA300_2106    | putative transcriptional regulator                        | 730 |
| SAUSA300_2024    | anti-sigma-B factor, antagonist (rsbV)                    | 731 |
| SAUSA300_1127-s3 | chromosome segregation protein SMC (smc)                  | 732 |
| SAUSA300_1254    | putative membrane protein                                 | 733 |
| pUSA03_0032      | oriT nickase (nes)                                        | 734 |
| SAUSA300_0809    | putative DNA primase                                      | 735 |
| SAUSA300_0941    | putative ferrichrome ABC transporter                      | 736 |
| SAUSA300_1612    | DNA-3-methyladenine glycosidase (tag) [3.2.2.-]           | 737 |
| SAUSA300_0523    | ribosomal protein L1 (rplA)                               | 738 |
| SAUSA300_0151    | alcohol dehydrogenase, iron-containing (adhE) [1.1.1.1]   | 739 |
| SAUSA300_0424.4  | psmA1                                                     | 740 |
| SAUSA300_0578    | conserved hypothetical protein                            | 741 |
| SAUSA300_1304    | conserved hypothetical protein                            | 742 |
| SAUSA300_0324    | conserved hypothetical protein                            | 743 |
| SAUSA300_2311    | conserved hypothetical protein                            | 744 |
| SAUSA300_2363    | cation efflux family protein                              | 745 |
| SAUSA300_1923    | autolysin [3.5.1.28]                                      | 746 |
| SAUSA300_2049    | phosphomethylpyrimidine kinase (thiD) [2.7.4.7]           | 747 |
| SAUSA300_1159    | transcription termination factor NusA (nusA)              | 748 |
| SAUSA300_0039    | conserved hypothetical protein                            | 749 |
| SAUSA300_2526    | dihydroorotate dehydrogenase (pyrD) [1.3.3.1]             | 750 |
| SAUSA300_0491    | cysteine synthase A (cysK) [2.5.1.47]                     | 751 |
| SAUSA300_1962    | phiPVL ORF39-like protein                                 | 752 |
|                  | molybdenum ABC transporter, permease protein ModB         |     |
| SAUSA300_2229    | (modB)                                                    | 753 |
|                  | glyceraldehyde-3-phosphate dehydrogenase, type I (gap)    |     |
| SAUSA300_0756    | [1.2.1.-]                                                 | 754 |
| SAUSA300_0765    | SsrA-binding protein (smpB)                               | 755 |
| SAUSA300_0298    | conserved hypothetical protein                            | 756 |



|               |                                                                |     |
|---------------|----------------------------------------------------------------|-----|
| SAUSA300_1715 | riboflavin biosynthesis protein (ribD) [3.5.4.26 1.1.1.193]    | 757 |
| SAUSA300_1165 | riboflavin biosynthesis protein ribF (ribF) [2.7.1.26 2.7.7.2] | 758 |
| SAUSA300_1765 | lantibiotic epidermin biosynthesis protein EpiC (epiC)         | 759 |
| SAUSA300_0834 | D-isomer specific 2-hydroxyacid dehydrogenase                  | 760 |
| SAUSA300_0910 | magnesium transporter (mgtE)                                   | 761 |
|               | oligopeptide ABC transporter, substrate-binding protein        |     |
| SAUSA300_0891 | (oppA)                                                         | 762 |
| SAUSA300_1720 | conserved hypothetical protein                                 | 763 |
| SAUSA300_0014 | DHH subfamily 1 protein                                        | 764 |
| SAUSA300_0625 | teichoic acid ABC transporter protein (tagG)                   | 765 |
| SAUSA300_0293 | conserved hypothetical protein                                 | 766 |
| SAUSA300_2239 | urease, beta subunit (ureB) [3.5.1.5]                          | 767 |
| SAUSA300_0327 | conserved hypothetical protein                                 | 768 |
| SAUSA300_2402 | conserved hypothetical protein                                 | 769 |
| SAUSA300_0668 | conserved hypothetical protein                                 | 770 |
| SAUSA300_0088 | hypothetical protein                                           | 771 |
| SAUSA300_2584 | preprotein translocase, secA protein                           | 772 |
| SAUSA300_2006 | dihydroxy-acid dehydratase (ilvD) [4.2.1.9]                    | 773 |
| SAUSA300_0412 | staphylococcus tandem lipoprotein, authentic frameshift        | 774 |
|               | peptide chain release factor 2, programmed frameshift          |     |
| SAUSA300_0738 | (prfB)                                                         | 775 |
| SAUSA300_0551 | conserved hypothetical protein                                 | 776 |
| SAUSA300_0007 | conserved hypothetical protein                                 | 777 |
| SAUSA300_0770 | conserved hypothetical protein                                 | 778 |
| SAUSA300_1068 | antibacterial protein                                          | 779 |
| SAUSA300_0504 | pyridoxine biosynthesis protein                                | 780 |
| SAUSA300_0574 | phosphomevalonate kinase [2.7.4.2]                             | 781 |
| SAUSA300_0225 | putative acyl-CoA acetyltransferase FadA                       | 782 |
| pUSA03_0012   | membrane protein TraC (traC)                                   | 783 |
| SAUSA300_2251 | dehydrogenase family protein                                   | 784 |
| SAUSA300_1323 | conserved hypothetical protein                                 | 785 |
| SAUSA300_1235 | guanosine monophosphate reductase (guaC) [1.7.1.7]             | 786 |
| SAUSA300_1520 | conserved hypothetical protein                                 | 787 |
| SAUSA300_1636 | DNA polymerase I superfamily (polA) [2.7.7.7]                  | 788 |
| SAUSA300_0514 | serine acetyltransferase (cysE) [2.3.1.30]                     | 789 |
| SAUSA300_1783 | uroporphyrinogen decarboxylase (hemE) [4.1.1.37]               | 790 |
| SAUSA300_1730 | S-adenosylmethionine synthetase (metK) [2.5.1.6]               | 791 |
| SAUSA300_1549 | ComE operon protein 1                                          | 792 |
| SAUSA300_1092 | uracil permease (pyrP)                                         | 793 |
| SAUSA300_2545 | choline dehydrogenase (betA) [1.1.99.1]                        | 794 |
| SAUSA300_2241 | urease accessory protein UreE (ureE)                           | 795 |
| SAUSA300_0980 | putative membrane protein                                      | 796 |
|               | phosphoenolpyruvate carboxykinase (ATP) (pckA)                 |     |
| SAUSA300_1731 | [4.1.1.49]                                                     | 797 |
| SAUSA300_0922 | membrane protein, TerC family                                  | 798 |
| SAUSA300_1986 | nitroreductase family protein                                  | 799 |
| SAUSA300_1302 | ATPase family protein                                          | 800 |
| SAUSA300_1136 | putative GTP-binding protein                                   | 801 |
| SAUSA300_0426 | conserved hypothetical protein                                 | 802 |
|               | transporter, monovalent cation:proton antiporter-2 (CPA2)      |     |
| SAUSA300_0911 | family protein                                                 | 803 |
| SAUSA300_0859 | NADH-dependent flavin oxidoreductase                           | 804 |
| SAUSA300_0748 | conserved hypothetical protein                                 | 805 |
| SAUSA300_0434 | cystathionine gamma-synthase (metB) [4.4.1.8]                  | 806 |
| SAUSA300_1798 | DNA-binding response regulator                                 | 807 |

|                  |                                                                               |     |
|------------------|-------------------------------------------------------------------------------|-----|
|                  | 2-oxoisovalerate dehydrogenase, E1 component, alpha subunit [1.2.4.1]         | 808 |
| SAUSA300_1466    | subunit [1.2.4.1]                                                             | 808 |
| SAUSA300_2539    | aminotransferase                                                              | 809 |
| SAUSA300_1112    | protein phosphatase 2C domain protein                                         | 810 |
| SAUSA300_1538    | ribosomal protein L11 methyltransferase (prmA) [2.1.1.-]                      | 811 |
| SAUSA300_1885    | DNA ligase (ligA) [6.5.1.2]                                                   | 812 |
| SAUSA300_0825    | oxidoreductase, 2-nitropropane dioxygenase family                             | 813 |
| SAUSA300_2644    | glucose-inhibited division protein B (gidB) [2.1.-.-]                         | 814 |
| SAUSA300_1576    | helicase, RecD/TraA family                                                    | 815 |
| pUSA03_0013      | TraD (traD)                                                                   | 816 |
| SAUSA300_1928    | phi77 ORF002-like protein, phage minor structural protein                     | 817 |
| SAUSA300_0087    | conserved hypothetical protein, authentic point mutation                      | 818 |
| SAUSA300_2513    | conserved hypothetical protein                                                | 819 |
| SAUSA300_0929    | conserved hypothetical protein                                                | 820 |
| SAUSA300_0865    | glucose-6-phosphate isomerase (pgi) [5.3.1.9]                                 | 821 |
| SAUSA300_1548    | ComE operon protein 2                                                         | 822 |
| SAUSA300_2298    | multidrug resistance protein B, drug resistance transporter                   | 823 |
| SAUSA300_0199    | conserved hypothetical protein                                                | 824 |
| SAUSA300_0532    | translation elongation factor G (fusA)                                        | 825 |
| SAUSA300_1992    | accessory gene regulator protein A (agrA)                                     | 826 |
| SAUSA300_0299    | conserved hypothetical protein                                                | 827 |
| SAUSA300_1852    | putative ABC transporter, ATP-binding protein                                 | 828 |
| SAUSA300_0301    | conserved hypothetical protein                                                | 829 |
| SAUSA300_1928-s3 | phi77 ORF002-like protein, phage minor structural protein                     | 830 |
| SAUSA300_0454    | recombination protein RecR (recR)                                             | 831 |
| SAUSA300_1200    | glutamine synthetase repressor (glnR)                                         | 832 |
| SAUSA300_2325    | conserved hypothetical protein                                                | 833 |
| SAUSA300_1676    | probable transglycosylase (sgtA)                                              | 834 |
| SAUSA300_2176    | ABC transporter, ATP-binding protein                                          | 835 |
| SAUSA300_0125    | pyridoxal-dependent decarboxylase                                             | 836 |
| SAUSA300_1587    | histidyl-tRNA synthetase (hisS) [6.1.1.21]                                    | 837 |
| SAUSA300_0706    | putative osmoprotectant ABC transporter, ATP-binding protein                  | 838 |
| SAUSA300_2391    | glycine betaine/carnitine/choline ABC transporter (opuCc) [3.6.3.32]          | 839 |
| SAUSA300_1507    | glucokinase (glk) [2.7.1.2]                                                   | 840 |
| SAUSA300_1560    | conserved hypothetical protein                                                | 841 |
| SAUSA300_0146    | conserved hypothetical protein                                                | 842 |
| SAUSA300_0478    | ribose-phosphate pyrophosphokinase (prs) [2.7.6.1]                            | 843 |
| SAUSA300_0295    | conserved hypothetical protein                                                | 844 |
| SAUSA300_0994    | pyruvate dehydrogenase E1 component, beta subunit (pdhB) [1.2.4.1]            | 845 |
| SAUSA300_2192    | 50S ribosomal protein L5 (rplE)                                               | 846 |
| SAUSA300_0757    | phosphoglycerate kinase (pgk) [2.7.2.3]                                       | 847 |
| SAUSA300_0079    | putative lipoprotein                                                          | 848 |
| SAUSA300_1681    | acetoin utilization protein AcuC (acuC) [1.2.4.1]                             | 849 |
| SAUSA300_0857    | conserved hypothetical protein                                                | 850 |
| SAUSA300_1571    | O-methyltransferase family protein [2.1.1.-]                                  | 851 |
| SAUSA300_0190    | indole-3-pyruvate decarboxylase (ipdC) [4.1.1.74]                             | 852 |
| SAUSA300_1627    | translation initiation factor IF-3 (infC)                                     | 853 |
| SAUSA300_0601    | hydrolase, alpha/beta hydrolase fold family [3.4.11.5]                        | 854 |
| SAUSA300_2061    | ATP synthase F1, delta subunit (atpH) [3.6.3.14]                              | 855 |
| SAUSA300_1793    | conserved hypothetical protein                                                | 856 |
| SAUSA300_2038    | UDP-N-acetylmuramoyl-tripeptide--D-alanyl-D- alanine ligase (murF) [6.3.2.10] | 857 |

|                  |                                                            |     |
|------------------|------------------------------------------------------------|-----|
| SAUSA300_1269    | methicillin resistance protein FemA (femA)                 | 858 |
|                  | DNA internalization-related competence protein             |     |
| SAUSA300_1547    | ComEC/Rec2                                                 | 859 |
|                  | UDP-N-acetylmuramoylalanyl-D-glutamate--2, 6-              |     |
| SAUSA300_0919    | diaminopimelate ligase (murE)                              | 860 |
| SAUSA300_2344    | uroporphyrin-III C-methyl transferase                      | 861 |
| SAUSA300_0373    | conserved hypothetical protein                             | 862 |
| SAUSA300_0481-s1 | transcription-repair coupling factor (mfd)                 | 863 |
|                  | phosphonate ABC transporter, phosphonate-binding           |     |
| SAUSA300_0145    | protein                                                    | 864 |
|                  | L-serine dehydratase, iron-sulfur-dependent, alpha subunit |     |
| SAUSA300_2469    | (sdaAA) [4.3.1.17]                                         | 865 |
| SAUSA300_0723    | conserved hypothetical protein                             | 866 |
| SAUSA300_2187    | 30S ribosomal protein S5 (rpsE)                            | 867 |
| SAUSA300_0132    | glycosyl transferase, group 1 family protein               | 868 |
| SAUSA300_0137    | transcriptional regulator, GntR family                     | 869 |
| SAUSA300_2560    | conserved hypothetical protein                             | 870 |
| SAUSA300_1133    | tRNA (guanine-N1)-methyltransferase (trmD) [2.1.1.31]      | 871 |
|                  | DNA-directed RNA polymerase, beta subunit (rpoC)           |     |
| SAUSA300_0528-s1 | [2.7.7.6]                                                  | 872 |
| SAUSA300_1594    | preprotein translocase, YajC subunit (yajC)                | 873 |
| SAUSA300_0424.3  | psmA2                                                      | 874 |
| SAUSA300_2282    | putative membrane protein                                  | 875 |
| SAUSA300_0603    | conserved hypothetical protein                             | 876 |
| SAUSA300_0139    | putative tetracycline resistance protein                   | 877 |
| SAUSA300_0284    | conserved hypothetical protein                             | 878 |
| SAUSA300_0202    | peptide ABC transporter, permease protein                  | 879 |
| SAUSA300_0283-s1 | essC protein                                               | 880 |
| SAUSA300_1957    | phiPVL ORF046-like protein                                 | 881 |
| SAUSA300_1371    | ATP-dependent DNA helicase RecQ (recQ) [3.6.1.-]           | 882 |
| SAUSA300_2562    | conserved hypothetical protein                             | 883 |
| SAUSA300_0795    | putative thioredoxin                                       | 884 |
| SAUSA300_2289    | conserved hypothetical protein                             | 885 |
| SAUSA300_0004    | DNA replication and repair protein recF (recF)             | 886 |
| SAUSA300_0252    | glycosyl transferase, group 2 family protein               | 887 |
| SAUSA300_2330    | conserved hypothetical protein                             | 888 |
| SAUSA300_2378    | conserved hypothetical protein                             | 889 |
| SAUSA300_1102    | guanylate kinase (gmk) [2.7.4.8]                           | 890 |
| SAUSA300_0275    | putative membrane protein                                  | 891 |
| SAUSA300_1441    | staphylococcal respiratory response protein, SrrB (srrB)   | 892 |
| SAUSA300_0644    | conserved hypothetical protein                             | 893 |
| SAUSA300_0133    | putative membrane protein                                  | 894 |
|                  | phiSLT ORF2067-like protein, phage tail tape measure       |     |
| SAUSA300_1393-s1 | protein                                                    | 895 |
| SAUSA300_2444    | gluconate operon transcriptional repressor (gntR)          | 896 |
| SAUSA300_0101    | staphylococcus tandem lipoprotein                          | 897 |
| SAUSA300_0649    | conserved hypothetical protein                             | 898 |
| SAUSA300_1370    | cell surface elastin binding protein (ebpS)                | 899 |
| SAUSA300_1649-s1 | DNA polymerase III, alpha subunit (dnaE) [2.7.7.7]         | 900 |
| SAUSA300_1474    | conserved hypothetical protein                             | 901 |
| SAUSA300_0356    | conserved hypothetical protein                             | 902 |
| SAUSA300_0410    | staphylococcus tandem lipoprotein                          | 903 |
| SAUSA300_1389    | phiSLT ORF636-like protein                                 | 904 |
| SAUSA300_0311    | PfkB family carbohydrate kinase                            | 905 |
| SAUSA300_0938    | conserved hypothetical protein                             | 906 |
| SAUSA300_2600    | intercellular adhesion protein A (icaA) [2.4.1.-]          | 907 |

|               |                                                                            |     |
|---------------|----------------------------------------------------------------------------|-----|
| SAUSA300_0219 | putative iron compound A C transporter, iron compound-binding protein      | 908 |
| SAUSA300_2130 | UTP-glucose-1-phosphate uridylyltransferase family protein [2.7.7.23]      | 909 |
| SAUSA300_2491 | 1-pyrroline-5-carboxylate dehydrogenase                                    | 910 |
| SAUSA300_2296 | similar to esterase                                                        | 911 |
| SAUSA300_2465 | ABC transporter, ATP-binding protein                                       | 912 |
| SAUSA300_2165 | alpha-acetolactate decarboxylase (budA) [4.1.1.5]                          | 913 |
| SAUSA300_0338 | glyoxalase family protein                                                  | 914 |
| SAUSA300_1447 | tyrosine recombinase XerD (xerD)                                           | 915 |
| SAUSA300_0286 | conserved hypothetical protein                                             | 916 |
| SAUSA300_2382 | conserved hypothetical protein                                             | 917 |
| SAUSA300_0272 | conserved hypothetical protein                                             | 918 |
| SAUSA300_0467 | methionyl-tRNA synthetase (metS) [6.1.1.10]                                | 919 |
| SAUSA300_1444 | segregation and condensation protein B (scpB)                              | 920 |
| SAUSA300_2083 | acetyltransferase, GNAT family                                             | 921 |
| SAUSA300_2030 | putative membrane protein                                                  | 922 |
| SAUSA300_2413 | conserved hypothetical protein                                             | 923 |
| SAUSA300_2163 | conserved hypothetical protein                                             | 924 |
| SAUSA300_2271 | phosphosugar-binding transcriptional regulator                             | 925 |
| SAUSA300_1801 | fumarate hydratase, class II (fumC) [4.2.1.2]                              | 926 |
| SAUSA300_0568 | integral membrane protein                                                  | 927 |
| SAUSA300_1332 | putative 5-3 exonuclease                                                   | 928 |
| SAUSA300_0234 | putative flavohemoprotein                                                  | 929 |
| SAUSA300_1528 | cytidine deaminase (cdd) [3.5.4.5]                                         | 930 |
| SAUSA300_1856 | conserved hypothetical protein                                             | 931 |
| SAUSA300_1517 | endonuclease IV [3.1.21.2]                                                 | 932 |
| SAUSA300_0128 | conserved hypothetical protein                                             | 933 |
| SAUSA300_1216 | cardiolipin synthetase [2.7.8.-]                                           | 934 |
| SAUSA300_1762 | lantibiotic epidermin immunity protein F (epiF)                            | 935 |
| pUSA03_0021   | transfer complex protein TraL (traL)                                       | 936 |
| SAUSA300_2362 | 2,3-bisphosphoglycerate-dependent phosphoglycerate mutase (gpmA) [5.4.2.1] | 937 |
| SAUSA300_0682 | ybaK/ebcC protein (ybaK)                                                   | 938 |
| SAUSA300_0329 | putative oxidoreductase                                                    | 939 |
| SAUSA300_2072 | peptide chain release factor 1 (prfA)                                      | 940 |
| SAUSA300_2173 | tRNA pseudouridine synthase A (truA) [4.2.1.70]                            | 941 |
| SAUSA300_0640 | putative membrane protein                                                  | 942 |
| SAUSA300_0820 | cysteine desulfurases, SufS subfamily subfamily (sufs)                     | 943 |
| SAUSA300_0897 | tryptophanyl-tRNA synthetase (trpS) [6.1.1.2]                              | 944 |
| SAUSA300_1771 | conserved hypothetical protein                                             | 945 |
| SAUSA300_0730 | GGDEF domain protein                                                       | 946 |
| SAUSA300_0171 | cation efflux family protein                                               | 947 |
| SAUSA300_0527 | DNA-directed RNA polymerase, beta subunit (rpoB) [2.7.7.6]                 | 948 |
| SAUSA300_1908 | conserved hypothetical protein                                             | 949 |
| SAUSA300_2092 | general stress protein 20U (dps) [1.16.3.1]                                | 950 |
| SAUSA300_0185 | arginine biosynthesis bifunctional protein ArgJ (argJ) [2.3.1.35]          | 951 |
| SAUSA300_2546 | glycine betaine aldehyde dehydrogenase (betB) [1.2.1.8]                    | 952 |
| SAUSA300_1145 | tyrosine recombinase xerC (xerC)                                           | 953 |
| SAUSA300_2184 | preprotein translocase, SecY subunit                                       | 954 |
| SAUSA300_1615 | delta-aminolevulinic acid dehydratase (hemB) [4.2.1.24]                    | 955 |
| SAUSA300_1982 | 60 kDa chaperonin (groL)                                                   | 956 |
| SAUSA300_2569 | ornithine carbamoyltransferase (arcB) [2.1.3.3]                            | 957 |
| SAUSA300_0425 | NADH dehydrogenase I, F subunit                                            | 958 |

|                  |                                                                                                                   |      |
|------------------|-------------------------------------------------------------------------------------------------------------------|------|
| SAUSA300_0071    | ISSep1-like transposase                                                                                           | 959  |
| SAUSA300_1141    | endopeptidase resistance gene<br>1,4-dihydroxy-2-naphthoate octaprenyltransferase (menA)                          | 960  |
| SAUSA300_0944    | [2.5.-.]                                                                                                          | 961  |
| SAUSA300_2586    | accessory secretory protein Asp2                                                                                  | 962  |
| SAUSA300_1225    | aspartate kinase [2.7.2.4]                                                                                        | 963  |
| SAUSA300_0184    | acetylglutamate kinase (argB) [2.7.2.8]                                                                           | 964  |
| SAUSA300_1393-s2 | phiSLT ORF2067-like protein, phage tail tape measure<br>protein                                                   | 965  |
| SAUSA300_1152    | ribosome recycling factor (rrf)                                                                                   | 966  |
| SAUSA300_1250    | DNA topoisomerase IV, subunit B (parE) [5.99.1.-]<br>lantibiotic epidermin biosynthesis protein EpiD (epiD)       | 967  |
| SAUSA300_1764    | [4.1.1.36]                                                                                                        | 968  |
| SAUSA300_2004    | conserved hypothetical protein                                                                                    | 969  |
| SAUSA300_0593    | conserved hypothetical protein                                                                                    | 970  |
| SAUSA300_0097-s2 | conserved hypothetical protein                                                                                    | 971  |
| SAUSA300_0691    | DNA-binding response regulator SaeR (saeR)                                                                        | 972  |
| SAUSA300_0294    | conserved hypothetical protein                                                                                    | 973  |
| SAUSA300_1364    | GTP-binding protein EngA (engA) [1.1.1.95]                                                                        | 974  |
| SAUSA300_2421    | conserved hypothetical protein                                                                                    | 975  |
| SAUSA300_2170    | endonuclease/methylase LlaGI, degenerate                                                                          | 976  |
| SAUSA300_2079    | fructose bisphosphate aldolase (fba) [4.1.2.13]                                                                   | 977  |
| SAUSA300_0661    | conserved hypothetical protein                                                                                    | 978  |
| SAUSA300_0481-s2 | transcription-repair coupling factor (mfd)                                                                        | 979  |
| SAUSA300_2528    | conserved hypothetical protein                                                                                    | 980  |
| SAUSA300_0292    | conserved hypothetical protein                                                                                    | 981  |
| SAUSA300_1391    | phiSLT ORF527-like protein                                                                                        | 982  |
| SAUSA300_2605    | histidine biosynthesis bifunctional protein hisIE (hisIE)<br>manganese-dependent inorganic pyrophosphatase (ppaC) | 983  |
| SAUSA300_1900    | [3.6.1.1]                                                                                                         | 984  |
| SAUSA300_0887    | oligopeptide ABC transporter, permease protein (oppB)                                                             | 985  |
| SAUSA300_0040    | conserved hypothetical protein                                                                                    | 986  |
| SAUSA300_2432    | hydrolase, MutT/nudix family [3.6.1.-]                                                                            | 987  |
| SAUSA300_0367    | single-strand binding protein (ssb)                                                                               | 988  |
| pUSA02_0002      | plasmid recombination enzyme<br>glyceraldehyde-3-phosphate dehydrogenase, type I (gap)                            | 989  |
| SAUSA300_1633    | [1.2.1.-]                                                                                                         | 990  |
| pUSA03_0030      | conserved hypothetical protein                                                                                    | 991  |
| SAUSA300_1009    | GTP-binding protein (typA)                                                                                        | 992  |
| SAUSA300_2403    | putative lipoprotein                                                                                              | 993  |
| SAUSA300_0787    | 3-dehydroquinate dehydratase, type I (aroD) [4.2.1.10]                                                            | 994  |
| SAUSA300_1740    | conserved hypothetical protein                                                                                    | 995  |
| SAUSA300_1193    | glycerol-3-phosphate dehydrogenase (glpD) [1.1.99.5]                                                              | 996  |
| SAUSA300_1239    | transketolase (tkt) [2.2.1.1]                                                                                     | 997  |
| SAUSA300_1592    | single-stranded-DNA-specific exonuclease RecJ (recJ) [3.1.-<br>.-]                                                | 998  |
|                  | rRNA adenine N-6-methyltransferase (Macrolide-<br>lincosamide-streptogramin B resistance protein) (ermC)          |      |
| pUSA03_0007      | [2.1.1.48]                                                                                                        | 999  |
| SAUSA300_0126    | conserved hypothetical protein                                                                                    | 1000 |
| SAUSA300_1335    | conserved hypothetical protein<br>3-isopropylmalate dehydratase, large subunit (leuC)                             | 1001 |
| SAUSA300_2012    | [4.2.1.33]                                                                                                        | 1002 |
| SAUSA300_1234    | 30S ribosomal protein S14-2. (rpmN)                                                                               | 1003 |
| SAUSA300_2637    | conserved hypothetical protein                                                                                    | 1004 |
| SAUSA300_1581    | conserved hypothetical protein                                                                                    | 1005 |

|                  |                                                                                                                |      |
|------------------|----------------------------------------------------------------------------------------------------------------|------|
| SAUSA300_1014-s2 | pyruvate carboxylase (pyc) [6.4.1.1]<br>putative iron compound ABC transporter, iron compound-binding protein  | 1006 |
| SAUSA300_0598    | recombination protein U (recU)                                                                                 | 1007 |
| SAUSA300_1340    | ABC transporter, ATP-binding protein, MsbA family                                                              | 1008 |
| SAUSA300_0671    | conserved hypothetical protein                                                                                 | 1009 |
| SAUSA300_0287    | conserved hypothetical protein                                                                                 | 1010 |
| SAUSA300_1519    | conserved hypothetical protein                                                                                 | 1011 |
| SAUSA300_0221    | pyruvate formate-lyase activating enzyme (pflA) [1.97.1.4]                                                     | 1012 |
| SAUSA300_1637    | putative membrane protein                                                                                      | 1013 |
| SAUSA300_1260    | prephenate dehydrogenase [1.3.1.12]                                                                            | 1014 |
| SAUSA300_1896    | prephenate dehydratase (pheA) [4.2.1.51]                                                                       | 1015 |
| SAUSA300_1550    | conserved hypothetical protein                                                                                 | 1016 |
| SAUSA300_0407    | exotoxin                                                                                                       | 1017 |
| SAUSA300_1987    | hydrolase, carbon-nitrogen family                                                                              | 1018 |
| SAUSA300_1516    | ABC transporter, ATP-binding protein                                                                           | 1019 |
| SAUSA300_2075    | transcription termination factor Rho (rho)                                                                     | 1020 |
| SAUSA300_1310    | PAP2 family protein [3.1.3.27]<br>Isoleucyl-tRNA synthetase, mupirocin resistant protein (ileS) [6.1.1.5]      | 1021 |
| pUSA03_0003-s2   | putative negative regulator of genetic competence                                                              | 1022 |
| SAUSA300_0899    | D-alanine-activating enzyme/D-alanine-D-alanyl, dltD protein (dltD)                                            | 1023 |
| SAUSA300_0838    | exonuclease RexA (rexA)                                                                                        | 1024 |
| SAUSA300_0870    | polypeptide deformylase (def) [3.5.1.88]                                                                       | 1025 |
| SAUSA300_1108    | beta-lactamase                                                                                                 | 1026 |
| SAUSA300_2386    | conserved hypothetical protein                                                                                 | 1027 |
| SAUSA300_1018    | conserved hypothetical protein                                                                                 | 1028 |
| SAUSA300_2415    | conserved hypothetical protein                                                                                 | 1029 |
| SAUSA300_0727    | peptidase T (pepT) [3.4.11.4]                                                                                  | 1030 |
| SAUSA300_0524    | ribosomal protein L10 (rplJ)                                                                                   | 1031 |
| SAUSA300_1659    | thiol peroxidase (tpx) [1.11.1.-]<br>carbamoyl-phosphate synthase, large subunit (carB) [6.3.5.5]              | 1032 |
| SAUSA300_1096    | ABC transporter, ATP-binding protein                                                                           | 1033 |
| SAUSA300_0796    | pantothenate kinase (coaA) [2.7.1.33]                                                                          | 1034 |
| SAUSA300_2084    | molybdopterin-guanine dinucleotide biosynthesis protein A (mobA)                                               | 1035 |
| SAUSA300_2220    | amidohydrolase                                                                                                 | 1036 |
| SAUSA300_0534    | conserved hypothetical protein                                                                                 | 1037 |
| SAUSA300_2404    | amidohydrolase family protein                                                                                  | 1038 |
| SAUSA300_2517    | serine protease (htrA)                                                                                         | 1039 |
| SAUSA300_0923    | acetyl-CoA acetyltransferase [2.3.1.9]                                                                         | 1040 |
| SAUSA300_0355    | transcription antitermination factor NusB (nusB)                                                               | 1041 |
| SAUSA300_1473    | ribosome small subunit-dependent GTPase A (rsgA)                                                               | 1042 |
| SAUSA300_1114    | phiSLT ORF129-like protein                                                                                     | 1043 |
| SAUSA300_1387    | 30S ribosomal protein S1 (rpsA)                                                                                | 1044 |
| SAUSA300_1365    | tRNA-i(6)A37 thiotransferase enzyme MiaB (miaB)                                                                | 1045 |
| SAUSA300_1185    | type I restriction-modification enzyme, R subunit (hsdR)                                                       | 1046 |
| SAUSA300_0196    | DNA-binding response regulator, LuxR family                                                                    | 1047 |
| SAUSA300_1220    | conserved hypothetical protein                                                                                 | 1048 |
| SAUSA300_1658    | conserved hypothetical protein                                                                                 | 1049 |
| SAUSA300_0282    | conserved hypothetical protein                                                                                 | 1050 |
| SAUSA300_1417    | phiSLT ORF 175-like protein                                                                                    | 1051 |
| SAUSA300_2323    | transporter, CorA family (cobI)                                                                                | 1052 |
| SAUSA300_0510    | endopeptidase (clpC) [3.4.21.-]<br>glycerol-3-phosphate dehydrogenase, NAD-dependent (gpsA) [1.1.1.94 1.1.1.8] | 1053 |
| SAUSA300_1363    | thymidylate synthase (thyA) [2.1.1.45]                                                                         | 1054 |
| SAUSA300_1320    |                                                                                                                | 1055 |

|                  |                                                                                                                            |      |
|------------------|----------------------------------------------------------------------------------------------------------------------------|------|
| SAUSA300_1105    | primosomal protein N` (priA)                                                                                               | 1056 |
| SAUSA300_1157    | DNA polymerase III, alpha subunit (polC) [2.7.7.7]                                                                         | 1057 |
| SAUSA300_1393    | phiSLT ORF2067-like protein, phage tail tape measure protein                                                               | 1058 |
| SAUSA300_0162    | capsular polysaccharide biosynthesis protein Cap5K (cap5K)                                                                 | 1059 |
| SAUSA300_0420    | conserved hypothetical protein                                                                                             | 1060 |
| SAUSA300_1526    | DNA repair protein RecO (recO)                                                                                             | 1061 |
| SAUSA300_0445    | glutamate synthase, large subunit (gltB) [1.4.1.13]                                                                        | 1062 |
| SAUSA300_0097-s1 | conserved hypothetical protein                                                                                             | 1063 |
| SAUSA300_1442    | staphylococcal respiratory response protein, SrrA (srrA) putative 5-methyltetrahydrofolate--homocysteine methyltransferase | 1064 |
| SAUSA300_0358    | adenylate kinase (adk) [2.7.4.3]                                                                                           | 1065 |
| SAUSA300_2183    | glycosyl transferase, group 1 family protein                                                                               | 1066 |
| SAUSA300_0550    | transposase, IS30 family, authentic frameshift                                                                             | 1067 |
| SAUSA300_1477    | putative membrane protein                                                                                                  | 1068 |
| SAUSA300_1334    | siderophore biosynthesis protein, lucC family                                                                              | 1069 |
| SAUSA300_0123    | ribosomal large subunit pseudouridine synthase, RluD subfamily                                                             | 1070 |
| SAUSA300_1800    | oxidoreductase, short chain dehydrogenase/reductase family                                                                 | 1071 |
| SAUSA300_2275    | glutamyl-aminopeptidase [3.4.11.7]                                                                                         | 1072 |
| SAUSA300_1691    | glycosyl transferase, group 1 family protein [2.4.1.-]                                                                     | 1073 |
| SAUSA300_1349    | intercellular adhesion protein B (icaB)                                                                                    | 1074 |
| SAUSA300_2601    | phosphopantothoenylcysteine decarboxylase/phosphopantothenate--cysteine ligase (coaBC) [4.1.1.36 6.3.2.5]                  | 1075 |
| SAUSA300_1104    | conserved hypothetical protein                                                                                             | 1076 |
| SAUSA300_2209    | sucrose-6-phosphate hydrolase (scrB) [3.2.1.26]                                                                            | 1077 |
| SAUSA300_1994    | phosphoglucosamine mutase (glmM) [5.4.2.10]                                                                                | 1078 |
| SAUSA300_2111    | capsular polysaccharide biosynthesis protein Cap5E (cap5E) [5.1.3.- 4.2.1.-]                                               | 1079 |
| SAUSA300_0156    | aldo/keto reductase family protein [1.1.1.218]                                                                             | 1080 |
| SAUSA300_2159    | conserved hypothetical protein                                                                                             | 1081 |
| SAUSA300_1780    | ABC transporter, ATP-binding protein                                                                                       | 1082 |
| SAUSA300_1913    | Aspartyl/glutamyl-tRNA amidotransferase subunit B (gatB) [6.3.5.-]                                                         | 1083 |
| SAUSA300_1880    | conserved hypothetical protein                                                                                             | 1084 |
| SAUSA300_0085    | conserved hypothetical protein                                                                                             | 1085 |
| SAUSA300_1403    | phiSLT ORF412-like protein, portal protein                                                                                 | 1086 |

**Supplementary Table S4: Reactivity values of the 100 most IgG-reactive *S. aureus* antigen by protein immunoarray.** IgG reactivity for each antigen was determined across all patients and samples, with ranking determined by overall mean reactivity, in addition to the presence of reactivity in each patient at each time point (see Methods).



| ID               | Description                                                        | Average | 28729 v1 | 28729 v2 | 28729 v3 | 67029 v1 | 67029 v2 | 67029 v3 | 78202 v1 | 78202 v2 | 78202 v3 | 99361 v1 | 99361 v2 | 99361 v3 | HSS46713 v1 | HSS46713 v2 | HSS46713 v3 | Vander 06 v1 | Vander 06 v2 | Vander 06 v3 | Vander 07 v1 | Vander 07 v2 | Vander 07 v3 |       |
|------------------|--------------------------------------------------------------------|---------|----------|----------|----------|----------|----------|----------|----------|----------|----------|----------|----------|----------|-------------|-------------|-------------|--------------|--------------|--------------|--------------|--------------|--------------|-------|
| SAUSA300_0113    | immunoglobulin G binding protein A precursor                       | 6.370   | 5.871    | 5.542    | 5.932    | 6.766    | 6.121    | 6.443    | 5.554    | 6.443    | 5.554    | 6.285    | 5.427    | 6.508    | 6.162       | 6.201       | 6.339       | 6.199        | 7.634        | 7.722        | 7.768        | 7.802        | 6.982        | 6.538 |
| SAUSA300_0398    | superantigen-like protein S51A                                     | 6.212   | 5.841    | 5.560    | 5.863    | 6.797    | 6.150    | 6.505    | 5.694    | 5.051    | 5.491    | 5.407    | 6.492    | 6.085    | 6.167       | 6.339       | 6.074       | 6.391        | 6.774        | 7.426        | 7.905        | 7.674        | 6.886        | 6.412 |
| SAUSA300_0947    | superantigen-like protein S51B                                     | 6.210   | 5.829    | 5.607    | 5.898    | 6.745    | 6.113    | 6.466    | 5.327    | 4.700    | 5.415    | 5.114    | 6.492    | 6.089    | 6.172       | 6.349       | 6.080       | 6.380        | 6.740        | 7.405        | 7.893        | 7.628        | 6.872        | 6.411 |
| SAUSA300_2366    | gamma-hemolysin component C (HgcC)                                 | 6.185   | 5.624    | 5.468    | 5.866    | 6.595    | 5.965    | 6.338    | 5.337    | 4.857    | 5.271    | 5.225    | 6.522    | 6.020    | 6.004       | 6.153       | 5.912       | 6.304        | 7.456        | 8.531        | 9.347        | 8.618        | 6.273        | 6.273 |
| SAUSA300_2579    | N-acetylmuramoyl-L-alanine amidase domain protein                  | 6.123   | 5.944    | 5.532    | 5.840    | 6.388    | 5.706    | 6.130    | 5.611    | 4.963    | 6.201    | 5.031    | 6.276    | 5.865    | 6.251       | 6.336       | 6.104       | 6.592        | 6.466        | 6.993        | 7.749        | 6.910        | 6.411        | 6.411 |
| SAUSA300_0883    | MAP domain-containing protein, extracellular adherence protein Eap | 6.086   | 5.095    | 5.106    | 5.314    | 6.520    | 5.998    | 6.314    | 5.422    | 4.909    | 6.401    | 5.190    | 6.262    | 5.886    | 6.027       | 6.211       | 6.125       | 7.224        | 7.232        | 6.440        | 7.281        | 6.670        | 6.610        | 5.859 |
| SAUSA300_2364    | IgG-binding protein S51 (sb1)                                      | 6.039   | 5.753    | 5.427    | 5.772    | 6.402    | 5.820    | 6.234    | 5.272    | 4.536    | 6.096    | 4.888    | 6.207    | 5.793    | 6.239       | 6.322       | 6.077       | 6.956        | 7.448        | 6.147        | 7.216        | 6.358        | 6.622        | 6.122 |
| SAUSA300_1029    | non-regulated surface determinant Protein A (IsdA)                 | 6.031   | 5.688    | 5.341    | 5.695    | 6.350    | 5.819    | 6.079    | 5.255    | 4.723    | 5.018    | 5.006    | 6.311    | 5.865    | 5.968       | 6.054       | 5.906       | 6.329        | 7.088        | 7.324        | 6.243        | 7.383        | 6.613        | 5.907 |
| SAUSA300_1028    | non-regulated surface determinant Protein B (IsdB)                 | 6.028   | 5.709    | 5.422    | 5.811    | 6.290    | 5.695    | 6.025    | 5.531    | 4.988    | 6.352    | 5.144    | 6.377    | 5.868    | 6.067       | 6.145       | 5.964       | 6.469        | 6.937        | 7.702        | 7.279        | 6.671        | 6.621        | 6.147 |
| SAUSA300_1920    | chemotaxis-inhibiting protein CHPS (chs)                           | 5.947   | 5.628    | 5.282    | 5.596    | 6.543    | 5.872    | 6.219    | 5.096    | 4.503    | 5.840    | 4.955    | 6.232    | 5.833    | 5.874       | 6.125       | 5.819       | 6.893        | 7.043        | 6.104        | 7.084        | 6.422        | 6.528        | 6.128 |
| SAUSA300_1382    | Panton-Valentine leukocidin, LukS-PV (lukS-PV)                     | 5.857   | 5.372    | 5.273    | 5.768    | 6.197    | 5.769    | 6.188    | 4.946    | 4.944    | 6.413    | 4.800    | 6.423    | 5.808    | 5.806       | 6.121       | 5.743       | 6.119        | 6.918        | 5.687        | 6.481        | 6.267        | 5.414        | 5.414 |
| SAUSA300_2367    | gamma-hemolysin component B (HgbB)                                 | 5.854   | 5.245    | 5.116    | 5.499    | 6.155    | 5.712    | 6.076    | 5.336    | 4.884    | 6.182    | 5.026    | 6.258    | 5.863    | 5.601       | 5.800       | 5.646       | 6.409        | 7.122        | 5.879        | 6.835        | 6.501        | 5.799        | 5.799 |
| SAUSA300_1768    | leukotoxin LukD (lukD)                                             | 5.850   | 5.416    | 5.207    | 5.573    | 6.158    | 5.746    | 6.128    | 5.500    | 4.999    | 6.356    | 5.115    | 6.397    | 5.970    | 5.815       | 5.954       | 5.814       | 5.852        | 6.783        | 5.411        | 6.698        | 6.315        | 5.648        | 5.648 |
| SAUSA300_1917    | map protein, programmed frameshift (map)                           | 5.828   | 5.166    | 4.961    | 5.295    | 6.172    | 5.801    | 5.975    | 5.256    | 4.632    | 5.046    | 4.867    | 6.157    | 5.817    | 6.054       | 5.900       | 5.844       | 7.005        | 7.196        | 6.094        | 6.602        | 6.142        | 5.431        | 5.431 |
| SAUSA300_0651    | CHAP domain family                                                 | 5.802   | 4.236    | 4.071    | 3.766    | 6.428    | 5.811    | 6.101    | 5.156    | 4.529    | 6.010    | 4.776    | 6.007    | 5.993    | 6.021       | 5.962       | 5.901       | 7.315        | 7.307        | 6.459        | 7.348        | 6.644        | 6.121        | 6.121 |
| SAUSA300_0951    | V8 protease (sspA) [3.4.21.19]                                     | 5.800   | 4.470    | 4.777    | 5.057    | 5.963    | 5.492    | 5.801    | 5.441    | 4.777    | 6.195    | 4.765    | 6.240    | 5.701    | 5.645       | 5.675       | 5.585       | 7.066        | 6.933        | 6.022        | 7.312        | 6.787        | 6.089        | 6.089 |
| SAUSA300_0408    | heme uptake protein (IsdI)                                         | 5.792   | 5.377    | 4.944    | 4.988    | 5.560    | 5.853    | 6.359    | 5.246    | 4.752    | 6.113    | 5.021    | 6.275    | 5.773    | 5.599       | 5.642       | 5.200       | 5.966        | 6.093        | 5.469        | 7.399        | 6.732        | 6.287        | 6.287 |
| SAUSA300_0438    | CHAP domain family                                                 | 5.766   | 4.207    | 3.900    | 3.719    | 6.528    | 5.883    | 6.225    | 5.008    | 4.492    | 6.002    | 4.901    | 6.144    | 5.889    | 6.012       | 6.126       | 5.953       | 7.069        | 6.977        | 6.022        | 6.320        | 7.192        | 6.604        | 6.185 |
| SAUSA300_0409    | putative exported protein                                          | 5.763   | 5.093    | 4.896    | 5.419    | 6.590    | 5.778    | 6.272    | 4.730    | 4.201    | 5.817    | 4.853    | 6.228    | 5.705    | 6.015       | 6.128       | 5.943       | 6.387        | 6.960        | 5.607        | 6.766        | 6.210        | 5.333        | 5.333 |
| SAUSA300_0693    | putative lipoprotein                                               | 5.747   | 5.150    | 4.935    | 5.714    | 5.769    | 5.446    | 5.760    | 5.128    | 4.802    | 6.121    | 5.361    | 6.472    | 6.042    | 6.164       | 6.218       | 6.050       | 6.395        | 7.079        | 5.917        | 6.076        | 6.018        | 4.071        | 4.071 |
| SAUSA300_0214    | Sugar phosphate isomerase/epimerase PFAM family PF07582            | 5.730   | 4.909    | 4.895    | 5.253    | 6.037    | 5.674    | 5.967    | 5.149    | 4.662    | 6.074    | 4.860    | 6.173    | 5.624    | 5.537       | 5.691       | 5.535       | 6.537        | 6.986        | 5.924        | 6.660        | 6.364        | 5.793        | 5.793 |
| SAUSA300_2506    | immunomodulator staphylococcal antigen A precursor (isaA)          | 5.655   | 4.982    | 4.599    | 5.191    | 6.383    | 5.749    | 6.121    | 4.627    | 4.214    | 5.431    | 4.878    | 6.094    | 5.693    | 5.973       | 5.935       | 5.841       | 6.413        | 6.309        | 5.145        | 6.698        | 6.379        | 5.819        | 5.819 |
| SAUSA300_1058    | alpha-hemolysin precursor                                          | 5.599   | 5.358    | 5.112    | 5.618    | 6.215    | 5.757    | 6.032    | 5.256    | 4.828    | 6.100    | 5.072    | 6.225    | 5.837    | 5.827       | 5.926       | 5.882       | 3.890        | 4.641        | 4.090        | 7.342        | 6.524        | 6.048        | 6.048 |
| SAUSA300_0548-v2 | sdrE protein (sdrE)                                                | 5.592   | 4.758    | 4.452    | 4.642    | 6.870    | 6.090    | 6.535    | 5.726    | 5.055    | 6.538    | 4.014    | 5.335    | 4.724    | 5.823       | 5.940       | 5.192       | 6.644        | 6.676        | 6.148        | 5.908        | 5.568        | 5.026        | 5.026 |
| SAUSA300_0276    | zinc metalloprotease precursor (nucl) [3.1.3.1.1]                  | 5.558   | 4.000    | 3.813    | 3.691    | 6.124    | 6.563    | 5.883    | 5.077    | 4.504    | 5.831    | 4.920    | 6.098    | 5.705    | 5.554       | 5.608       | 5.573       | 6.772        | 6.906        | 6.045        | 6.867        | 6.225        | 5.639        | 5.639 |
| SAUSA300_0947-v1 | superantigen (sdrE)                                                | 5.498   | 4.098    | 4.012    | 3.692    | 6.022    | 6.049    | 6.415    | 5.629    | 4.709    | 5.808    | 4.815    | 6.368    | 5.845    | 6.142       | 5.839       | 6.359       | 6.489        | 6.389        | 6.412        | 6.863        | 6.412        | 6.409        | 6.409 |
| SAUSA300_2572    | zinc metalloprotease aureolysin (aur) [3.4.24.29]                  | 5.494   | 3.505    | 3.541    | 3.649    | 6.060    | 6.382    | 5.911    | 4.327    | 3.937    | 5.117    | 5.349    | 6.151    | 6.145    | 5.924       | 5.874       | 6.604       | 6.676        | 6.506        | 5.265        | 5.486        | 5.626        | 5.626        | 5.626 |
| SAUSA300_0370    | SEP staphylococcal enterotoxin                                     | 5.445   | 5.103    | 4.857    | 5.184    | 6.301    | 5.858    | 6.199    | 4.917    | 4.351    | 5.766    | 5.183    | 6.213    | 5.890    | 5.849       | 6.011       | 5.849       | 4.417        | 6.157        | 2.651        | 6.284        | 5.910        | 5.401        | 5.401 |
| SAUSA300_1030    | iron transport associated domain protein                           | 5.418   | 4.930    | 5.023    | 5.469    | 6.449    | 5.848    | 6.174    | 5.121    | 4.637    | 6.082    | 4.487    | 5.507    | 5.105    | 5.708       | 5.894       | 5.676       | 6.514        | 7.034        | 6.026        | 6.406        | 4.514        | 3.184        | 3.184 |
| SAUSA300_1476    | acetyl-CoA carboxylase, biotin carboxyl carrier protein (accB)     | 5.411   | 5.099    | 4.693    | 4.899    | 6.438    | 5.763    | 6.121    | 4.613    | 3.979    | 5.305    | 4.372    | 5.688    | 5.153    | 5.592       | 5.725       | 5.440       | 5.973        | 6.392        | 5.293        | 6.280        | 5.695        | 5.111        | 5.111 |
| SAUSA300_1322    | phospholipase precursor (sdr)                                      | 5.328   | 5.122    | 4.979    | 5.278    | 6.404    | 5.824    | 6.124    | 5.242    | 4.541    | 5.948    | 4.461    | 6.246    | 5.712    | 5.948       | 6.145       | 6.145       | 6.274        | 6.846        | 6.923        | 6.846        | 6.923        | 6.846        | 6.923 |
| SAUSA300_0862    | glucosylphosphoryl diester phosphodiesterase (gpD) [3.1.4.46]      | 5.268   | 4.757    | 4.393    | 4.839    | 6.859    | 5.411    | 5.693    | 3.958    | 3.210    | 4.682    | 4.297    | 5.504    | 4.979    | 5.180       | 5.144       | 5.050       | 6.544        | 6.669        | 5.697        | 6.745        | 6.200        | 5.804        | 5.804 |
| SAUSA300_1055    | fibronogen-binding protein (efb)                                   | 5.217   | 4.956    | 4.653    | 4.957    | 5.933    | 5.504    | 5.705    | 4.415    | 3.897    | 5.293    | 4.277    | 5.249    | 4.838    | 5.383       | 5.469       | 5.331       | 6.086        | 6.727        | 5.378        | 5.587        | 5.285        | 4.631        | 4.631 |
| SAUSA300_1481    | putative membrane protein                                          | 5.172   | 4.055    | 3.864    | 3.983    | 5.535    | 5.194    | 5.377    | 4.890    | 4.405    | 5.975    | 4.218    | 5.517    | 5.176    | 5.967       | 5.968       | 5.810       | 6.163        | 6.734        | 5.205        | 5.377        | 5.234        | 4.315        | 4.315 |
| SAUSA300_0955-v1 | autolysin (atl) [3.5.1.28]                                         | 5.170   | 3.664    | 3.408    | 3.277    | 6.138    | 5.676    | 5.905    | 4.485    | 3.940    | 5.382    | 4.666    | 5.812    | 5.410    | 5.399       | 5.499       | 5.341       | 6.077        | 6.232        | 5.424        | 5.914        | 5.681        | 5.024        | 5.024 |
| SAUSA300_0774    | secretory extracellular matrix and plasma binding protein (empbA)  | 5.170   | 5.319    | 5.022    | 5.336    | 6.315    | 6.133    | 5.202    | 4.643    | 4.154    | 4.495    | 5.786    | 4.603    | 4.995    | 5.832       | 5.514       | 5.517       | 4.856        | 5.217        | 5.294        | 4.893        | 4.426        | 4.206        | 4.206 |
| SAUSA300_1596    | alpha-hemolysin precursor (sdrB) [3.4.22.48]                       | 5.136   | 4.592    | 4.286    | 4.399    | 6.198    | 5.768    | 6.052    | 4.539    | 4.299    | 5.491    | 4.768    | 6.472    | 4.836    | 5.375       | 5.497       | 5.888       | 6.297        | 6.923        | 6.297        | 6.923        | 6.297        | 6.923        | 6.923 |
| SAUSA300_1381    | Panton-Valentine leukocidin, LukF-PV (lukF-PV)                     | 5.127   | 4.998    | 4.821    | 5.115    | 6.405    | 4.982    | 5.395    | 5.182    | 4.647    | 5.896    | 4.728    | 6.080    | 5.617    | 5.161       | 5.149       | 5.271       | 3.834        | 5.911        | 4.121        | 5.722        | 5.656        | 4.979        | 4.979 |
| SAUSA300_2441    | fibronectin-binding protein A (fbaA)                               | 5.124   | 5.087    | 4.886    | 5.196    | 6.065    | 5.400    | 5.828    | 4.562    | 3.827    | 5.536    | 4.586    | 5.922    | 5.421    | 5.557       | 5.840       | 5.677       | 4.309        | 4.211        | 4.126        | 5.719        | 5.371        | 4.766        | 4.766 |
| SAUSA300_2136    | iron compound ABC transporter, iron compound-binding protein       | 5.048   | 5.340    | 5.123    | 5.502    | 6.172    | 5.695    | 5.986    | 4.433    | 3.706    | 4.950    | 4.369    | 5.444    | 5.012    | 5.345       | 5.143       | 4.914       | 2.871        | 6.744        | 3.692        | 5.168        | 4.733        | 4.648        | 4.648 |
| SAUSA300_2440    | fibronectin-binding protein B (fbaB)                               | 5.013   | 4.795    | 4.632    | 4.875    | 5.860    | 5.346    | 5.698    | 4.616    | 4.199    | 5.408    | 4.627    | 5.854    | 5.414    | 5.305       | 5.141       | 5.266       | 4.076        | 4.111        | 3.684        | 5.122        | 5.532        | 4.859        | 4.859 |
| SAUSA300_        |                                                                    |         |          |          |          |          |          |          |          |          |          |          |          |          |             |             |             |              |              |              |              |              |              |       |

**Supplementary Table S5. Protein subsets based on differential IgG reactivity between infection groups.** Proteins identified in each group of the Venn Diagram in Figure 1B. The cutoff for each group was an average reactivity for that infection group of 1 or above.

**Supplementary Table S6: *S. aureus* patient isolates sequencing data.** Patient infecting *S. aureus* isolates were collected at the time of presentation and sequenced as described in Methods. Key: -: negative; +: positive; ACME: arginine catabolic mobile element; CC: clonal complex; *pvl*: Pantone-Valentine leukocidin; *SCCmec*: staphylococcal chromosome cassette *mec*.

<sup>a</sup> Strains were assigned to clonal complexes using the MLST mapping feature at the Ridom SpaServer (<http://spa.ridom.de/mlst.shtml>), or a combination of typing methods<sup>1</sup>.

| Patient ID | Kreiswith/Ridom<br><i>spa</i> type | <i>spa</i> motif | MRSA | <i>SCCmec</i> | <i>pvl</i> | ACME | CC <sup>a</sup> |
|------------|------------------------------------|------------------|------|---------------|------------|------|-----------------|
| SSTI 1     | 59/t211                            | YHGGFMBQBLO      | +    | 4             | +          | +    | CC8             |
| SSTI 2     | 1/t008                             | YHGFMBQBLO       | +    | 4             | +          | +    | CC8             |
| SSTI 3     | 1/t008                             | YHGFMBQBLO       | -    | -             | +          | -    | CC8             |
| SSTI 4     | t665                               | WGKKAKAO         | +    | 4             | +          | -    | CC30            |
| PJI 1      | 7/t064                             | YHGCMBQBLO       | +    | 4             | -          | -    | CC8             |
| PHO 1      | 536/t046                           | XKAKAOMQQQ       | -    | -             | -          | -    | CC30            |
| PHO 2      | 42/t065                            | A2AKBEMBKB       | -    | -             | -          | -    | CC45            |

### Supplementary References:

- 1 Mendes, R. E. *et al.* Characterization of methicillin-resistant *Staphylococcus aureus* strains recovered from a phase IV clinical trial for linezolid versus vancomycin for treatment of nosocomial pneumonia. *J Clin Microbiol* **50**, 3694-3702, doi:10.1128/JCM.02024-12 (2012).
